# Supplementary material
Source: PubMed Central journal article supplement (PMC7476038)
Supplement: jo0c01501_si_001.pdf [file jo0c01501_si_001.pdf]

Supporting Information

# Visible Light-mediated Photochemical Reactions of 2-(2'-Alkenyloxy)cycloalk-2-enones

Raphaela Graßl, Christian Jandl, Thorsten Bach\*

Department Chemie and Catalysis Research Center (CRC), Technische Universität München,  
Lichtenbergstr. 4, 85747 Garching, Germany

## Corresponding Author

\*Email: [thorsten.bach@ch.tum.de](mailto:thorsten.bach@ch.tum.de)

## Contents

|                                                                                                                                           |     |
|-------------------------------------------------------------------------------------------------------------------------------------------|-----|
| 1. Sensitizers and Catalyst Loadings Tested in Initial Studies.....                                                                       | S2  |
| 2. Side Product <b>S1</b> Formed from <b>4d</b> .....                                                                                     | S3  |
| 3. Phosphorescence Spectrum of <b>1a</b> .....                                                                                            | S4  |
| 4. Important NOE Contacts Obtained from NOESY Spectra of Compounds <b>8b</b> , <b>9b-e</b> , <b>11</b> , <b>13</b> and <b>16a-c</b> ..... | S6  |
| 5. 420 nm Fluorescent Light Tube Emission Spectrum .....                                                                                  | S8  |
| 6. NMR Spectra of All Compounds .....                                                                                                     | S9  |
| 7. UV/vis Spectra of All Irradiation Precursors .....                                                                                     | S52 |
| 8. X-ray Crystallographic Details.....                                                                                                    | S58 |
| 9. References .....                                                                                                                       | S65 |

## 1. Sensitizers and Catalyst Loadings Tested in Initial Studies

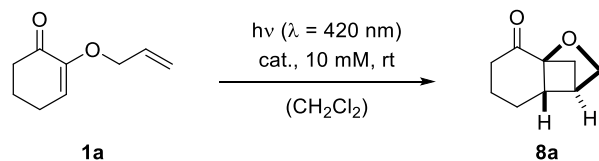

| # | Kat.                                                 | [mol%] | $E_T$ [kJ/mol]   | T [h] | Y [%] |
|---|------------------------------------------------------|--------|------------------|-------|-------|
| 1 | -*                                                   | -      | -                | 2.5   | 35    |
| 2 | Benzophenone*                                        | 10     | 290 <sup>1</sup> | 2.0   | 61    |
| 3 | Txt                                                  | 10     | 268 <sup>2</sup> | 2.5   | 73    |
| 4 | Txt                                                  | 5.0    | 268              | 2.5   | 72    |
| 5 | Txt                                                  | 2.5    | 268              | 2.5   | 70    |
| 6 | <sup>F</sup> Irpic                                   | 2.5    | 256 <sup>3</sup> | 2.5   | 81    |
| 7 | Ir(pFppy) <sub>3</sub>                               | 2.5    | 245 <sup>4</sup> | 3.0   | 69    |
| 8 | Ir(ppy) <sub>3</sub>                                 | 2.5    | 231 <sup>4</sup> | 5.0   | 85    |
| 9 | Ru(bpy) <sub>3</sub> (PF <sub>6</sub> ) <sub>2</sub> | 2.5    | 193 <sup>5</sup> | 27    | (rsm) |

\* irradiation performed at 350 nm

## 2. Side Product **S1** Formed from **4d**

In analogy to compound **2d**: KOH (85 wt%, 283 mg, 4.28 mmol, 1.0 equiv.) was dissolved in methallylic alcohol (1.5 mL, 1.29 mg, 17.9 mmol, 4.2 equiv.). A solution of epoxide **4d** (603 mg, 4.30 mmol, 1.0 equiv.) in methallylic alcohol (1.0 mL, 0.851 mg, 11.8 mmol, 2.8 equiv.) was then added dropwise and the reaction mixture was stirred at room temperature over night. Subsequently the reaction mixture was diluted with 15 mL CH<sub>2</sub>Cl<sub>2</sub> and quenched by the addition of 15 mL H<sub>2</sub>O. The layers were separated and the aqueous layer was extracted with CH<sub>2</sub>Cl<sub>2</sub> (3 × 30 mL). The combined organic layers were washed with brine (1 × 150 mL), dried over Na<sub>2</sub>SO<sub>4</sub>, filtrated and the solvent as well as the remaining volatiles were removed under reduced pressure. The irradiation precursor **2d** was dissolved in a minimum of Et<sub>2</sub>O and subjected to flash column chromatography. The remaining colorless solid was filtered off. It is insoluble in Et<sub>2</sub>O and poorly soluble in CH<sub>2</sub>Cl<sub>2</sub>. Single crystals were obtained from a saturated solution of **S1** in CH<sub>2</sub>Cl<sub>2</sub>. The structure and relative configuration of **S1** were determined by data obtained from SC-XRD measurements.

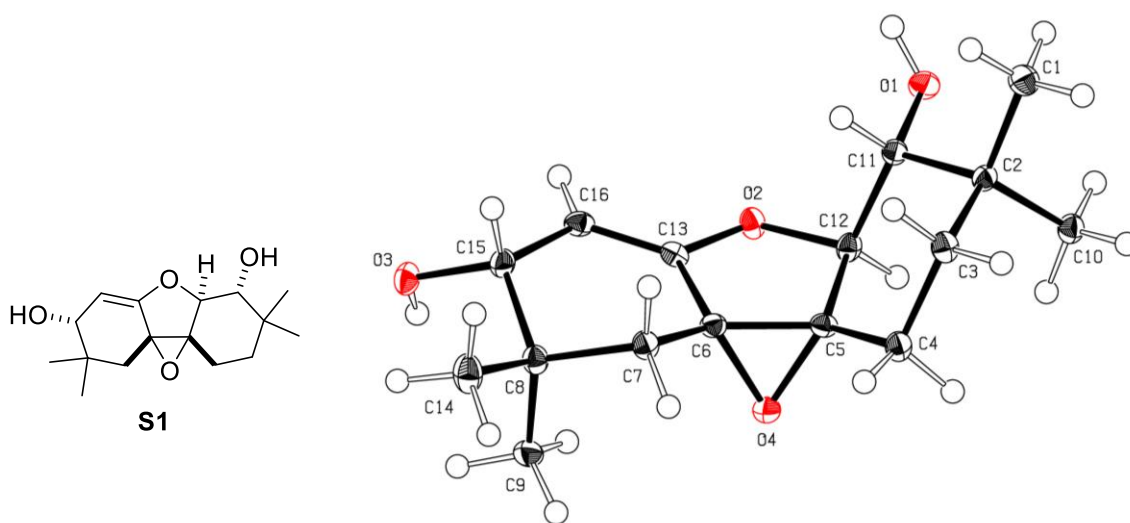

FIGURE S1. Structure of side product **S1** obtained by dimerization of epoxide **4d**. Ellipsoids in the ORTEP structure are displayed at the 50% probability level.

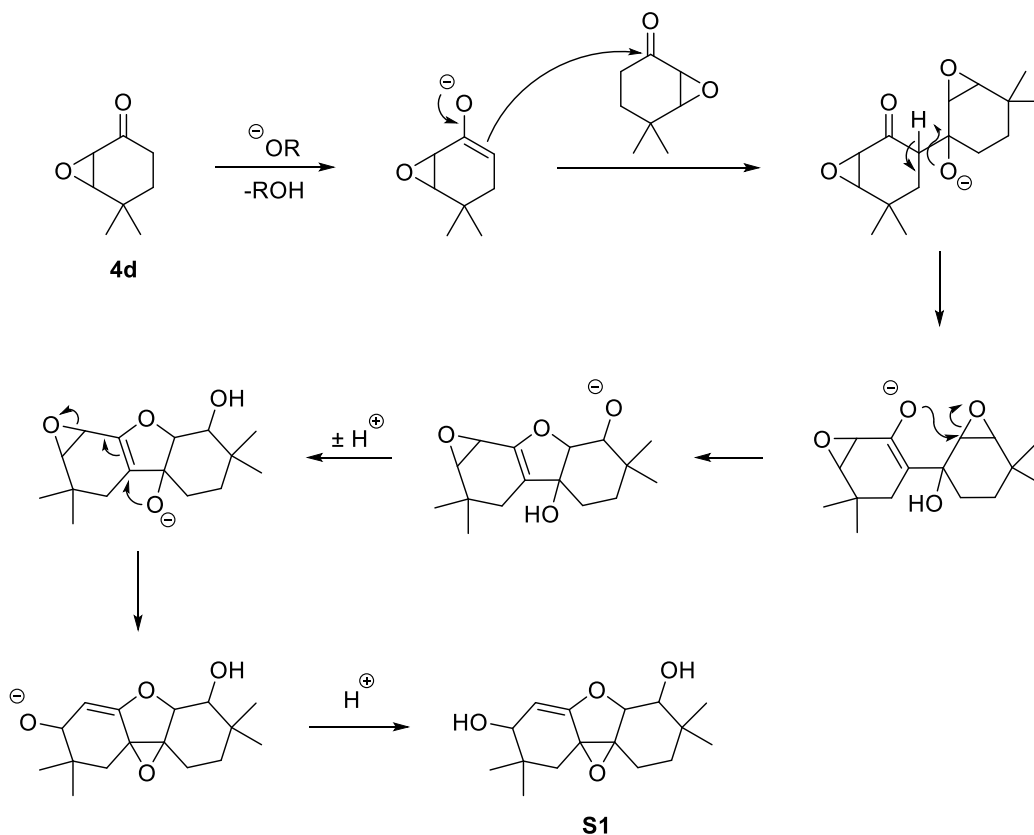

SCHEME S1. Mechanistic proposal for the formation of **S1**.

### 3. Phosphorescence Spectrum of **1a**

Luminescence Measurements were performed on a *Horiba Scientific FluoroMax-4P* instrument equipped with a continuous Xe source for steady state measurements and a Xe flashlight source for the observation of phosphorescence spectra. Fluorescence spectra were recorded at ambient conditions in 10×10 mm quartz cuvettes (*Hellma, Suprasil*). Luminescence spectra at cryogenic conditions (77 K) were recorded in quartz tubes (inner  $\varnothing = 4$  mm) in a small quartz Dewar vessel which was filled with liquid nitrogen. All solutions were handled under dry nitrogen and degassed (15 min in an ultrasoundbath) to exclude oxygen as triplet quencher. A longpass filter (*Schott Advanced Optics, WG300* or *Hebo Spezialglass, UV280*) was introduced in the emission-

beam path to prevent the excitation light to pass the emission monochromator at higher order wavelengths where necessary.

a)

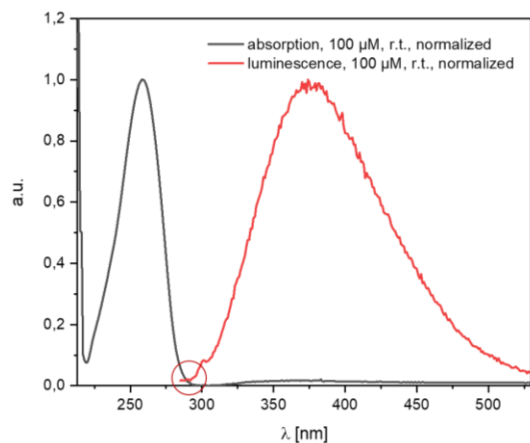

b)

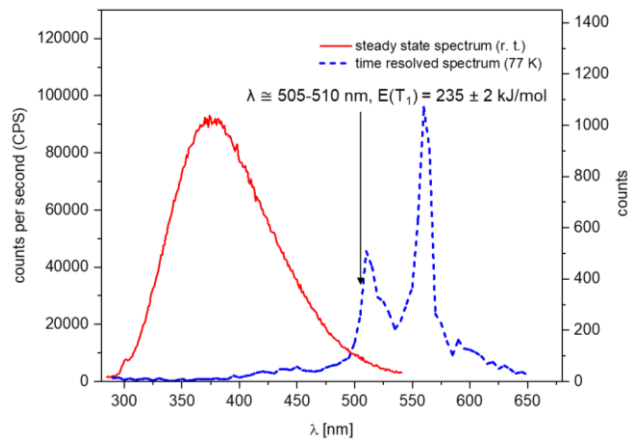

FIGURE S2. (a) Recorded UV/VIS of **1a** in  $\text{CH}_2\text{Cl}_2$  ( $c = 100 \mu\text{M}$ ), normalized to  $A_{259 \text{ nm}}$ ; recorded luminescence (UV280 filter glass applied) of **1a** in  $\text{CH}_2\text{Cl}_2$  ( $c = 100 \mu\text{M}$ ) at ambient conditions, normalized to  $I_{374 \text{ nm}}$ . (b) Steady state spectrum of **1a** in  $\text{CH}_2\text{Cl}_2$  ( $c = 100 \mu\text{M}$ ) at ambient conditions (UV280 filter glass applied) given in counts per second (red, solid line); time resolved spectrum (WG300 filter glass applied) of **1a** in  $\text{CH}_2\text{Cl}_2$  ( $c = 100 \mu\text{M}$ ) after 50  $\mu\text{s}$  delay at 77 K in counts (blue, dashed line).

4. Important NOE Contacts Obtained from NOESY Spectra of Compounds **8b**, **9b-e**, **11**, **13** and **16a-c**

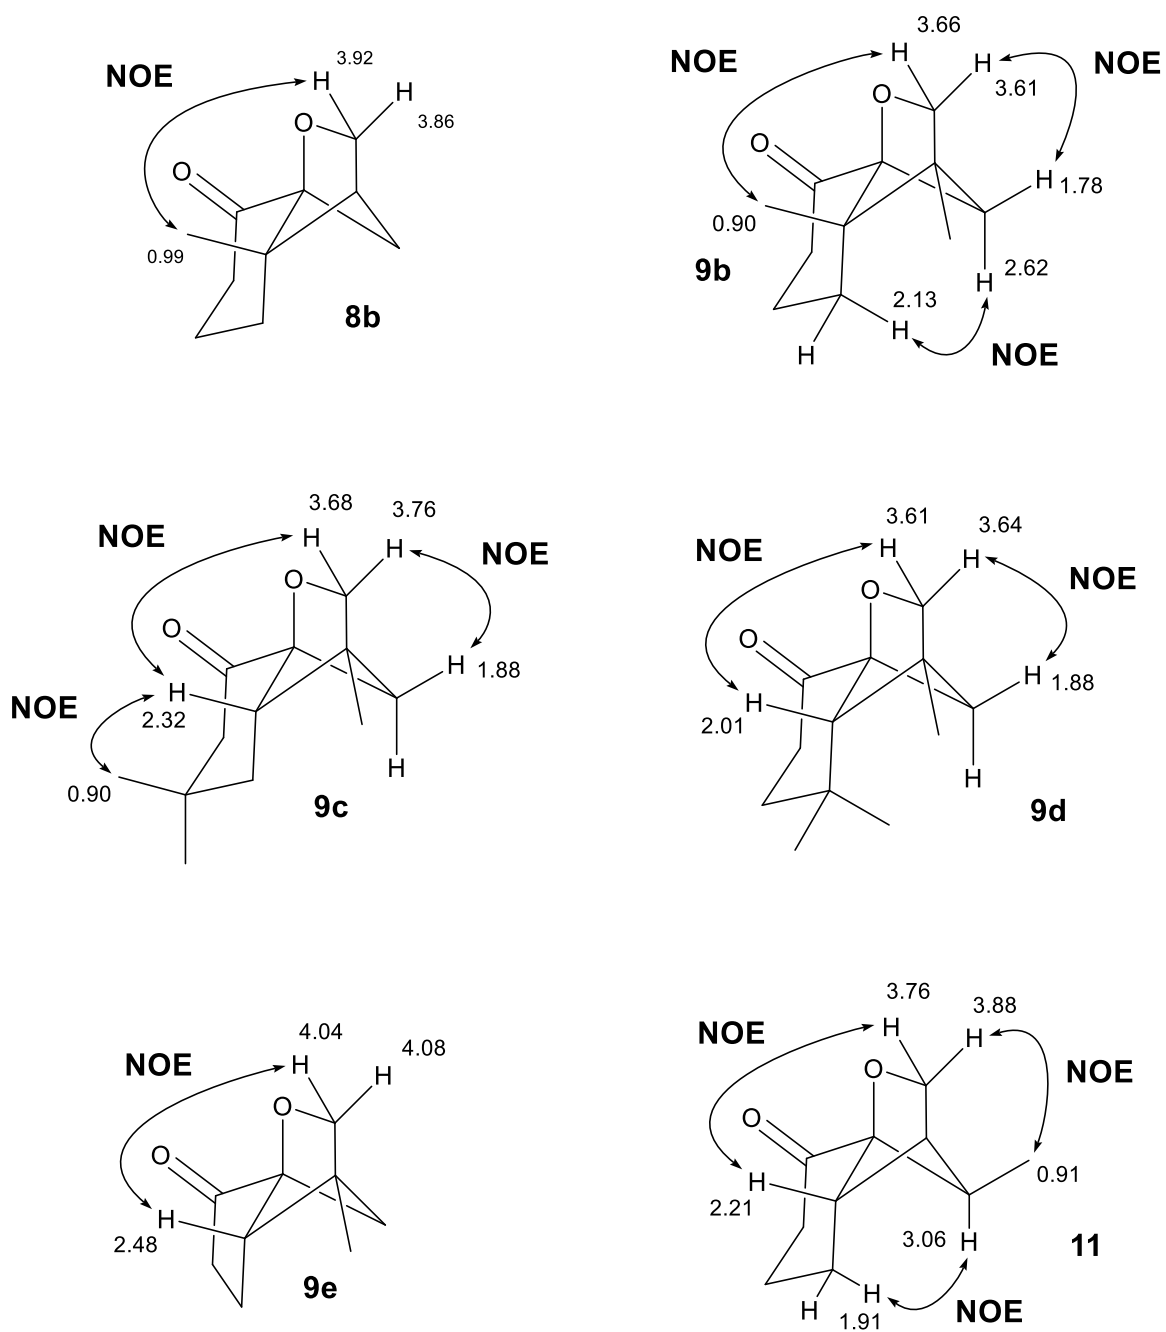

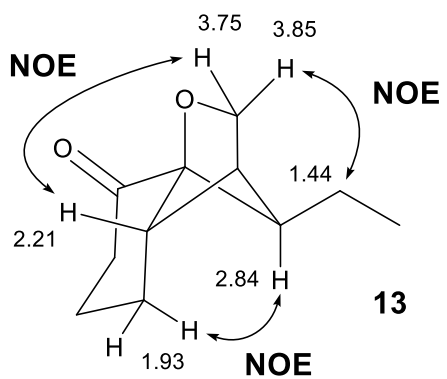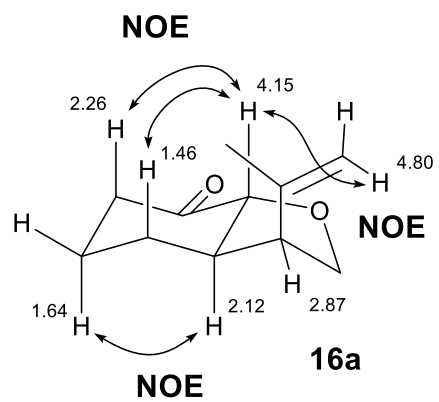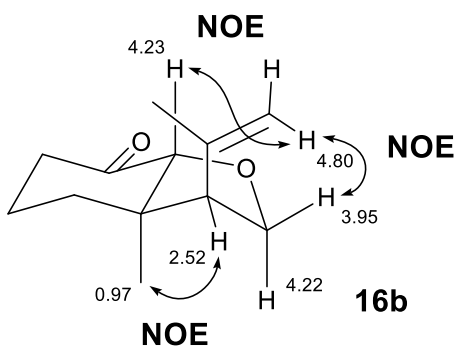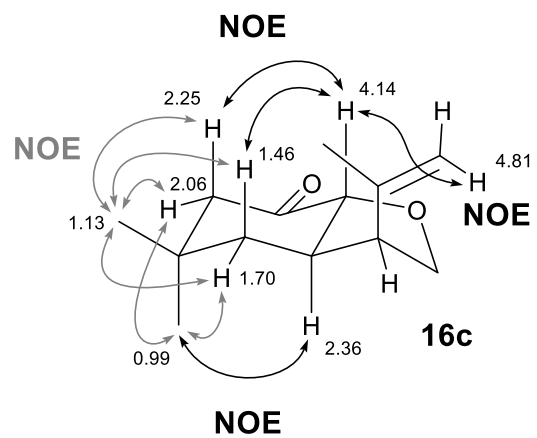

## 5. 420 nm Fluorescent Light Tube Emission Spectrum

| Lehrstuhl OC 1 - TUM                 |                                                                                                                                                                                                        | 200 nm   250 nm   300 nm   350 nm   400 nm   450 nm   500 nm   550 nm   600 nm   650 nm |  |
|--------------------------------------|--------------------------------------------------------------------------------------------------------------------------------------------------------------------------------------------------------|-----------------------------------------------------------------------------------------|--|
| <b>Datasheet FLT022</b>              |                                                                                                                                                                                                        | <b>LZC-420</b>                                                                          |  |
| <b>Basic Information</b>             |                                                                                                                                                                                                        |                                                                                         |  |
| Type                                 | Fluorescent light tube                                                                                                                                                                                 |                                                                                         |  |
| Description                          | Luzchem LZC-420                                                                                                                                                                                        |                                                                                         |  |
| Manufacturer / Supplier              | n/a / Luzchem                                                                                                                                                                                          |                                                                                         |  |
| Order number / Date of purch.        | n/a / 07/2017                                                                                                                                                                                          |                                                                                         |  |
| Internal lot / serial number         | 2017-07 / FLT022                                                                                                                                                                                       |                                                                                         |  |
| <b>Specification Manufacturer</b>    |                                                                                                                                                                                                        |                                                                                         |  |
| Type / size                          | T5 tube, G5 socket                                                                                                                                                                                     |                                                                                         |  |
| Mechanical specification             | 16 mm diameter, 288 mm length                                                                                                                                                                          |                                                                                         |  |
| Electrical specification             | 8 W                                                                                                                                                                                                    |                                                                                         |  |
| Wavelength (range, typ.)             | 400 - 440 nm                                                                                                                                                                                           |                                                                                         |  |
| Spectral width (FWHM)                | ~ 30 nm                                                                                                                                                                                                |                                                                                         |  |
| Datasheet                            | LES-420-016                                                                                                                                                                                            |                                                                                         |  |
| <b>Characterization</b>              |                                                                                                                                                                                                        |                                                                                         |  |
| Description of measurement           | Measured with Ocean-optics USB4000 spectrometer using a calibrated setup (cosine corrector/fibre).<br>The cosine corrector was placed at 20 mm distance from a single fluorescent tube at half height. |                                                                                         |  |
| Measured dominant wavelength / Int.  | 421 nm                                                                                                                                                                                                 | 121 $\mu\text{W}/\text{mm}^2\text{nm}$                                                  |  |
| Measured spectral width (FWHM)       | 30 nm                                                                                                                                                                                                  |                                                                                         |  |
| Integral Reference intensity / range | 4142 $\mu\text{W}/\text{cm}^2$                                                                                                                                                                         | 350-500 nm                                                                              |  |

### Spectrum

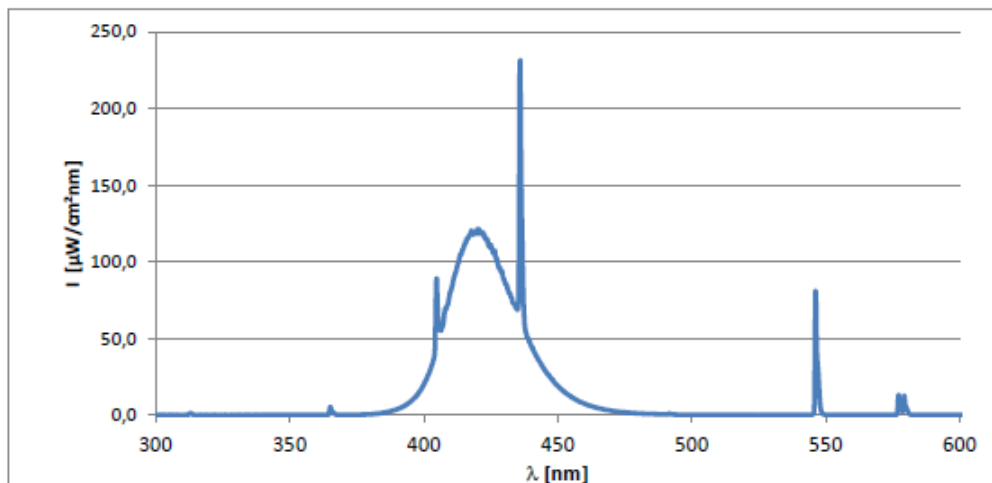



## 6. NMR Spectra of All Compounds

$^1\text{H}$  (400 MHz) and  $^{13}\text{C}\{^1\text{H}\}$  NMR (101 MHz) spectra of compound **1a** ( $\text{CDCl}_3$ )

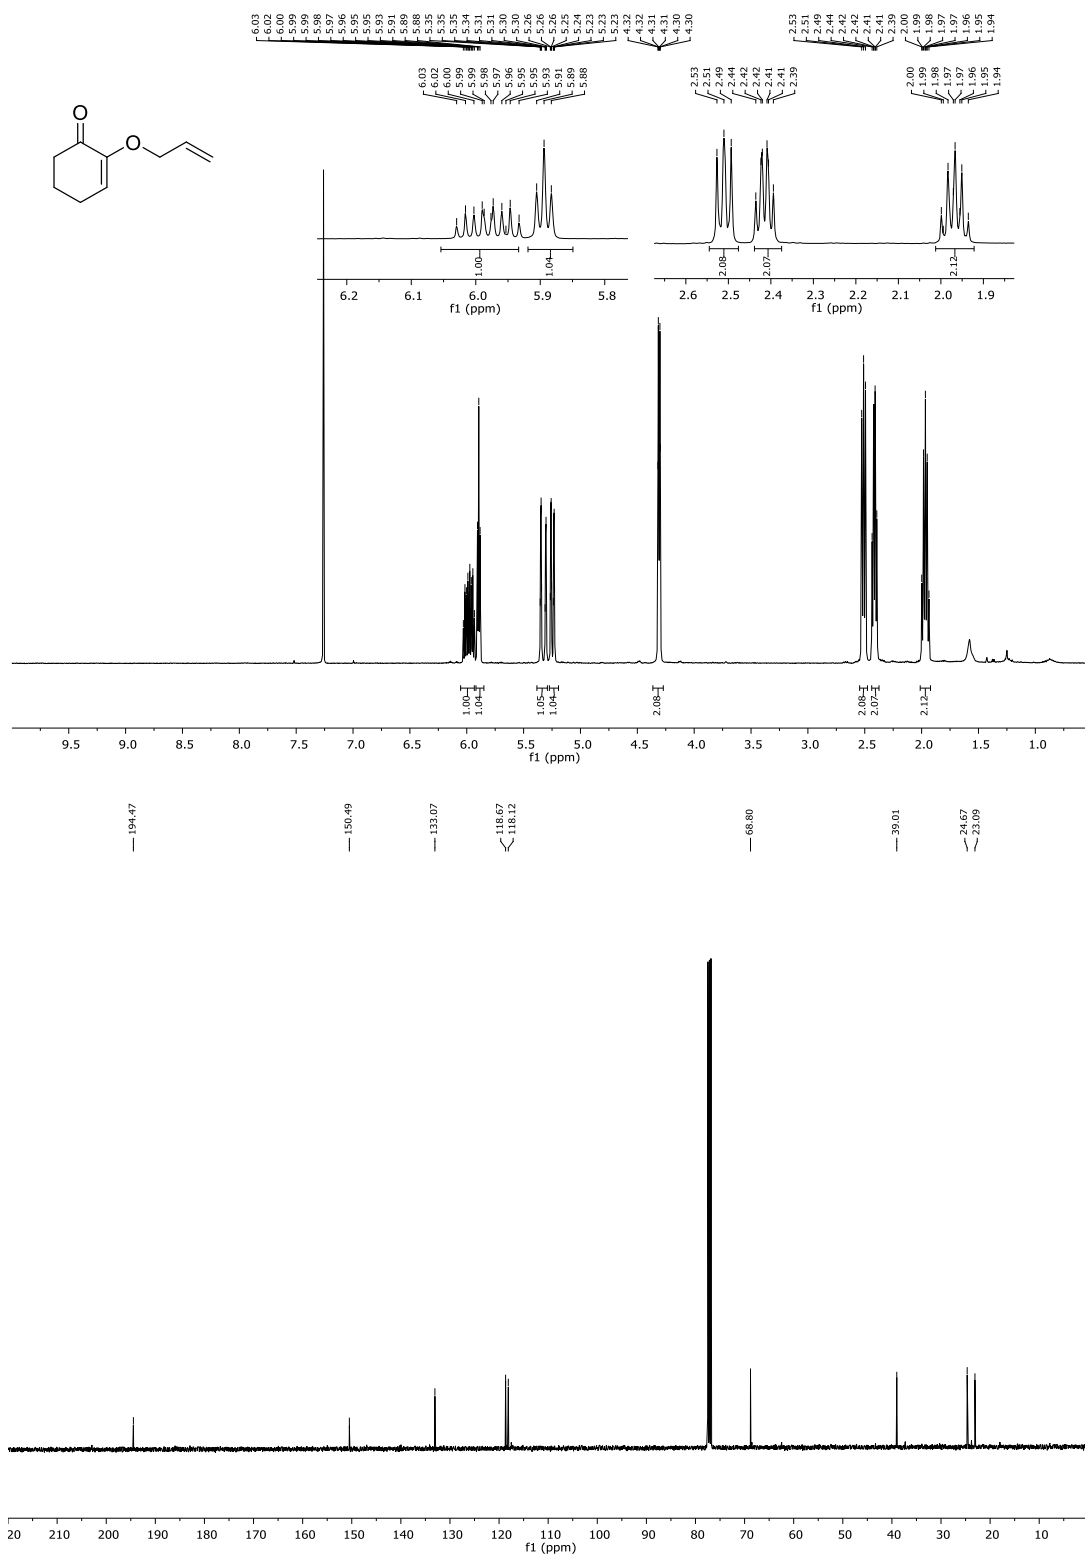

$^1\text{H}$  (500 MHz) and  $^{13}\text{C}\{^1\text{H}\}$  NMR (101 MHz) spectra of compound **1b** ( $\text{CDCl}_3$ )

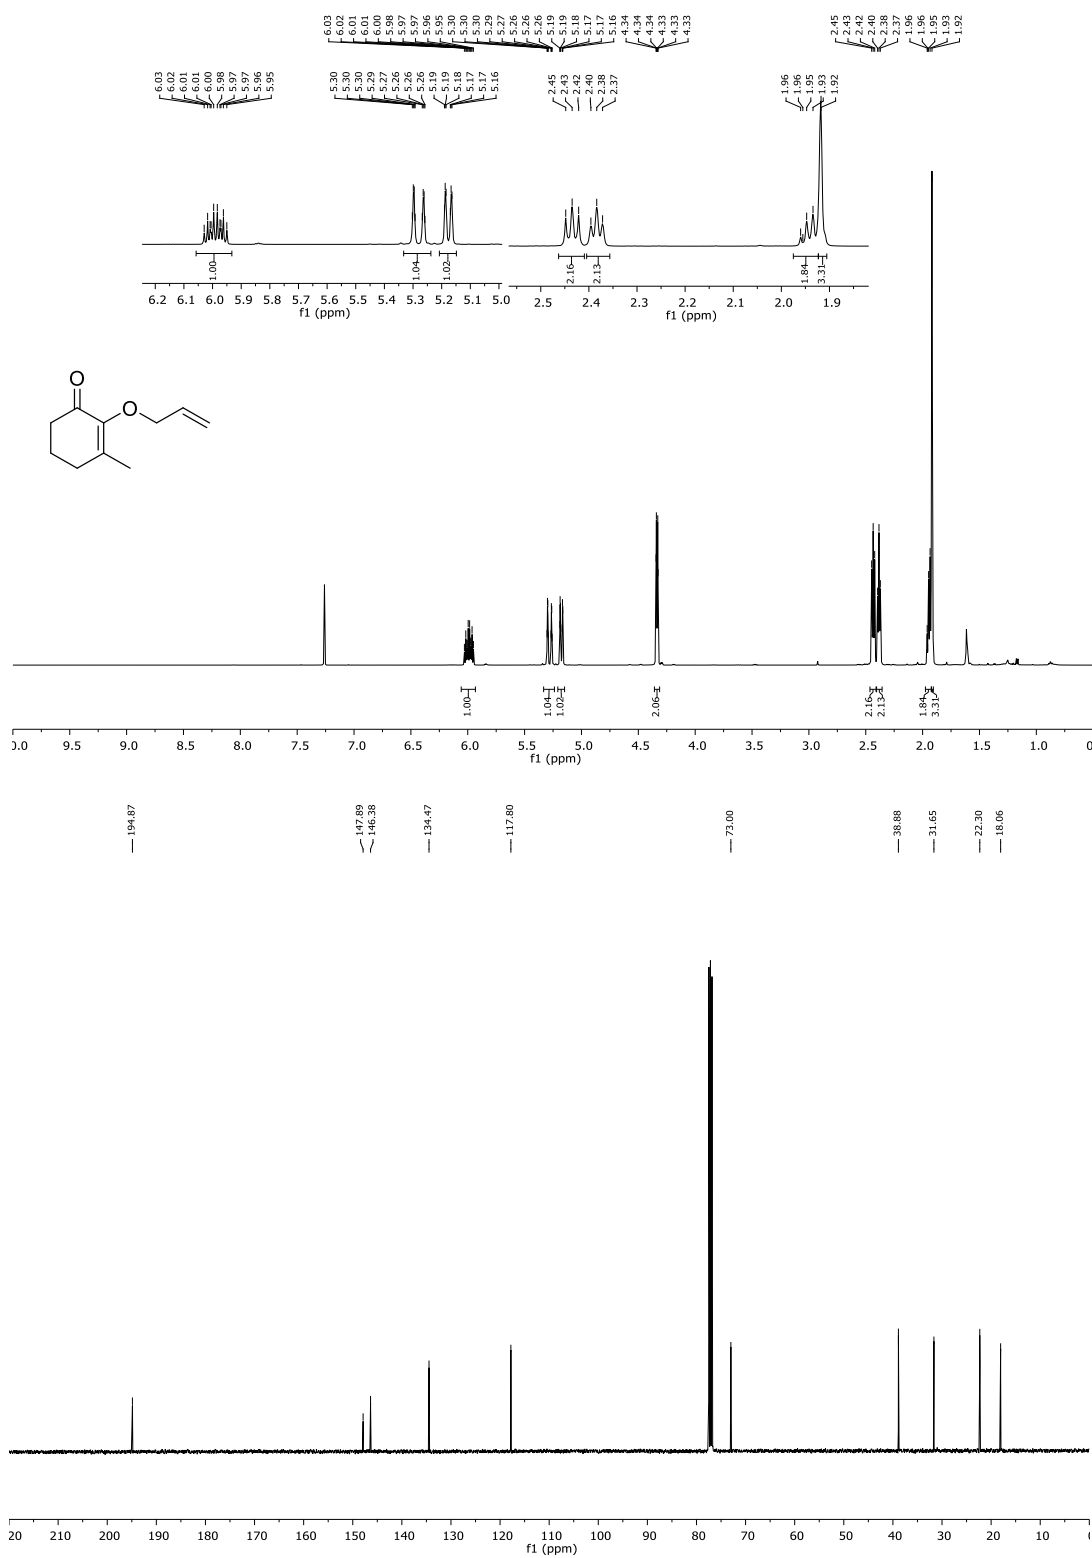

$^1\text{H}$  (500 MHz) and  $^{13}\text{C}\{^1\text{H}\}$  NMR (126 MHz) spectra of compound **1c** ( $\text{CDCl}_3$ )

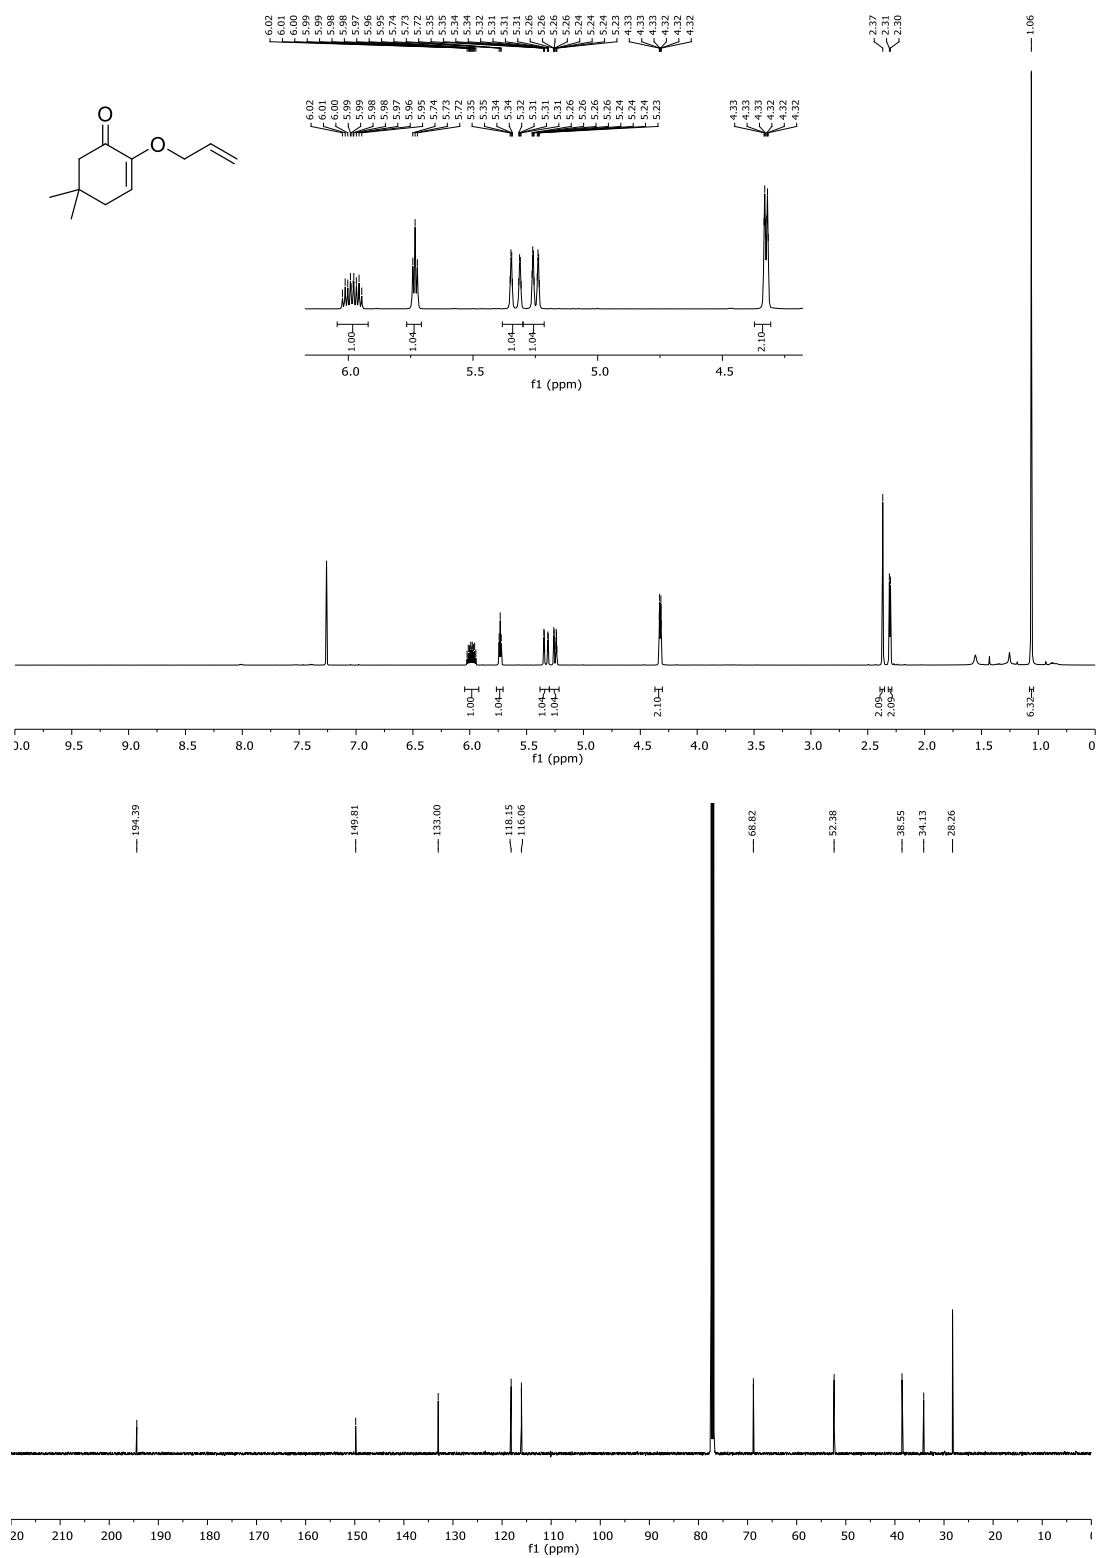

$^1\text{H}$  (500 MHz) and  $^{13}\text{C}\{^1\text{H}\}$  NMR (126 MHz) spectra of compound **1d** ( $\text{CDCl}_3$ )

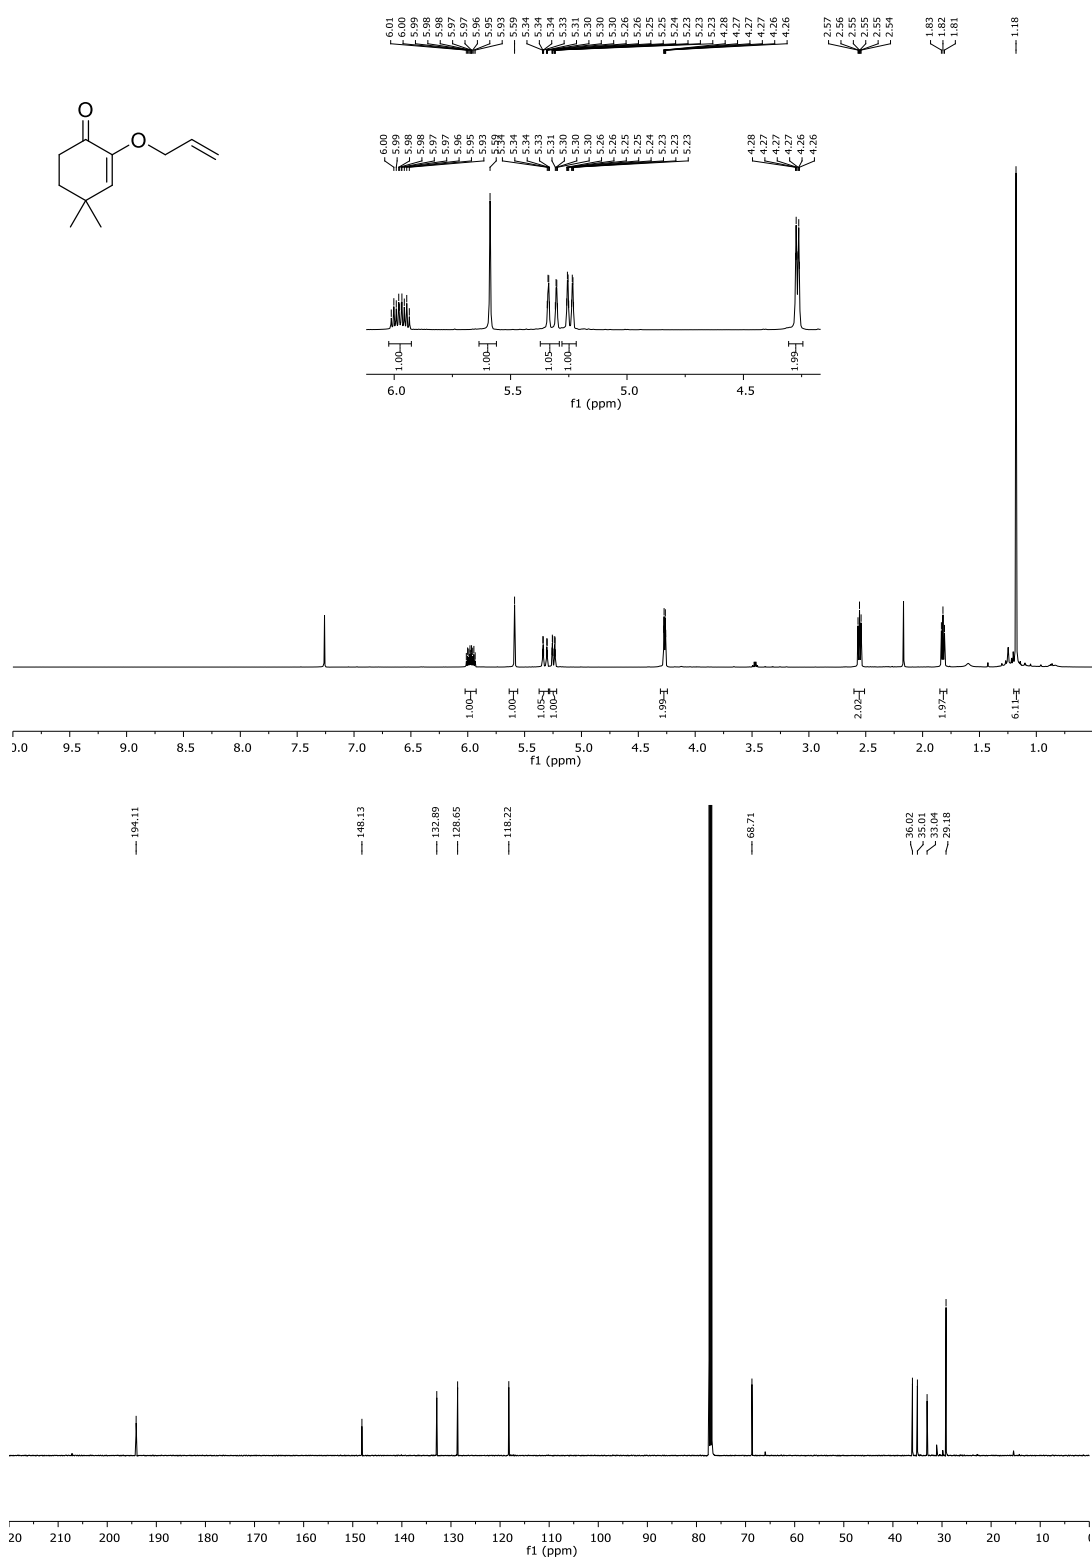

$^1\text{H}$  (500 MHz) and  $^{13}\text{C}\{^1\text{H}\}$  NMR (126 MHz) spectra of compound **1e** ( $\text{CDCl}_3$ )

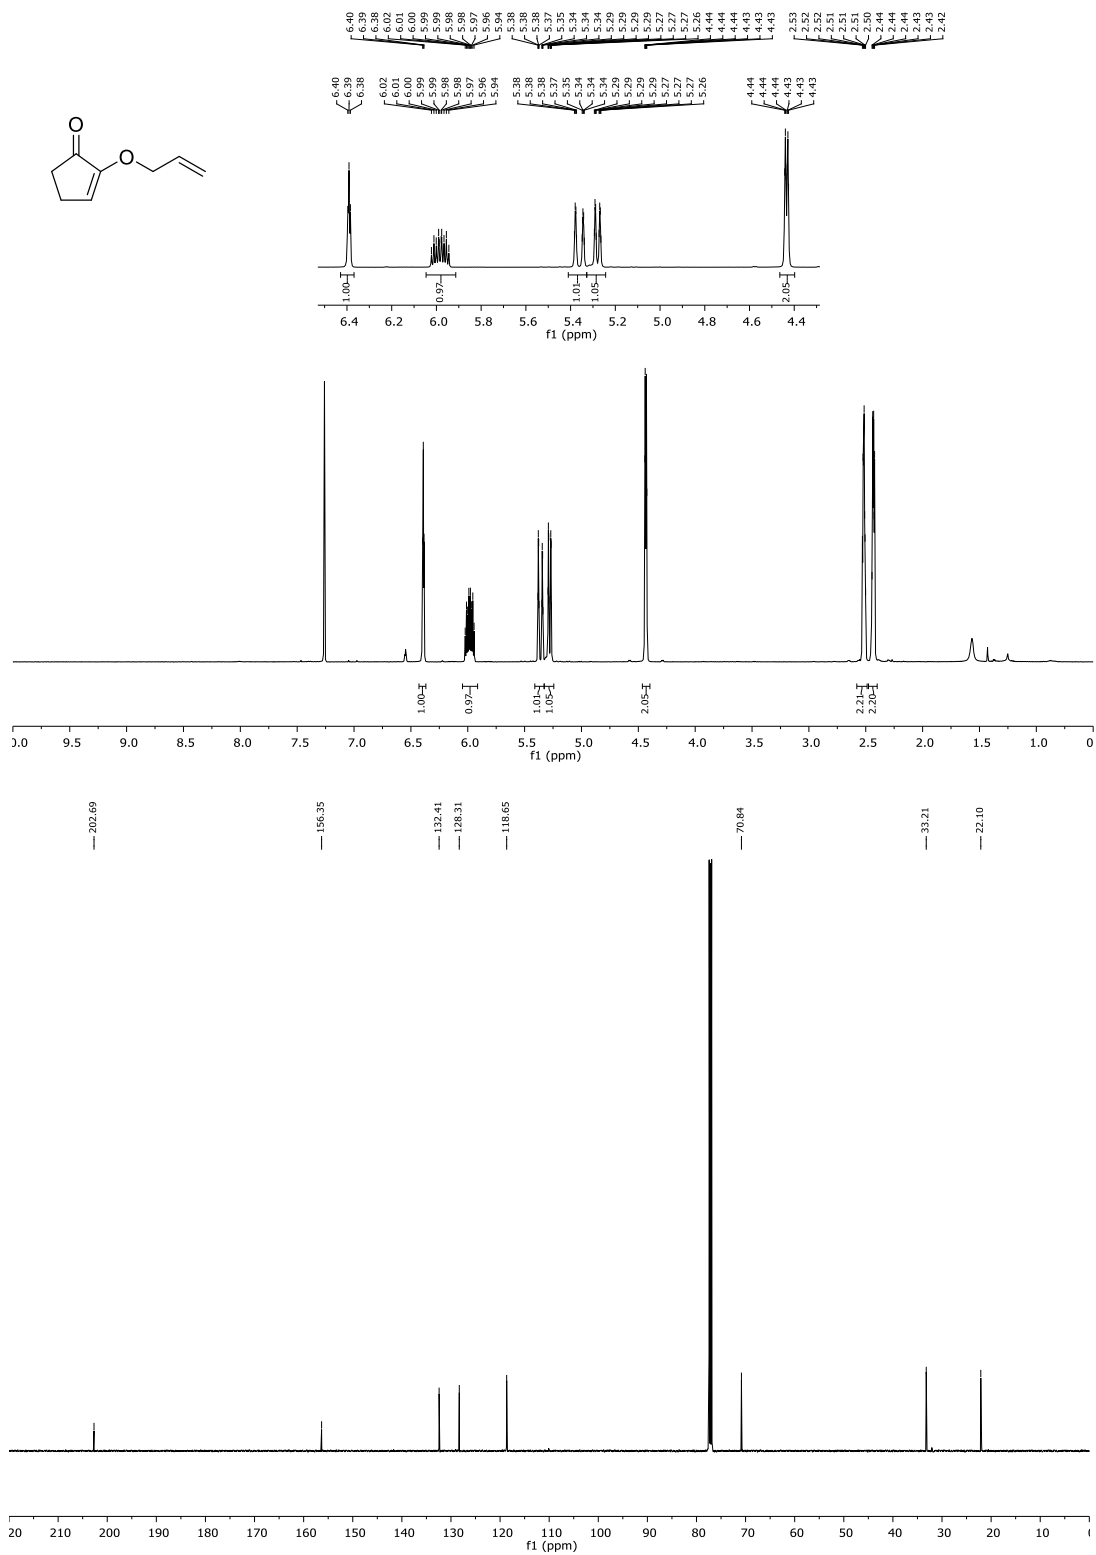

$^1\text{H}$  (400 MHz) and  $^{13}\text{C}\{^1\text{H}\}$  NMR (101 MHz) spectra of compound **1f** ( $\text{CDCl}_3$ )

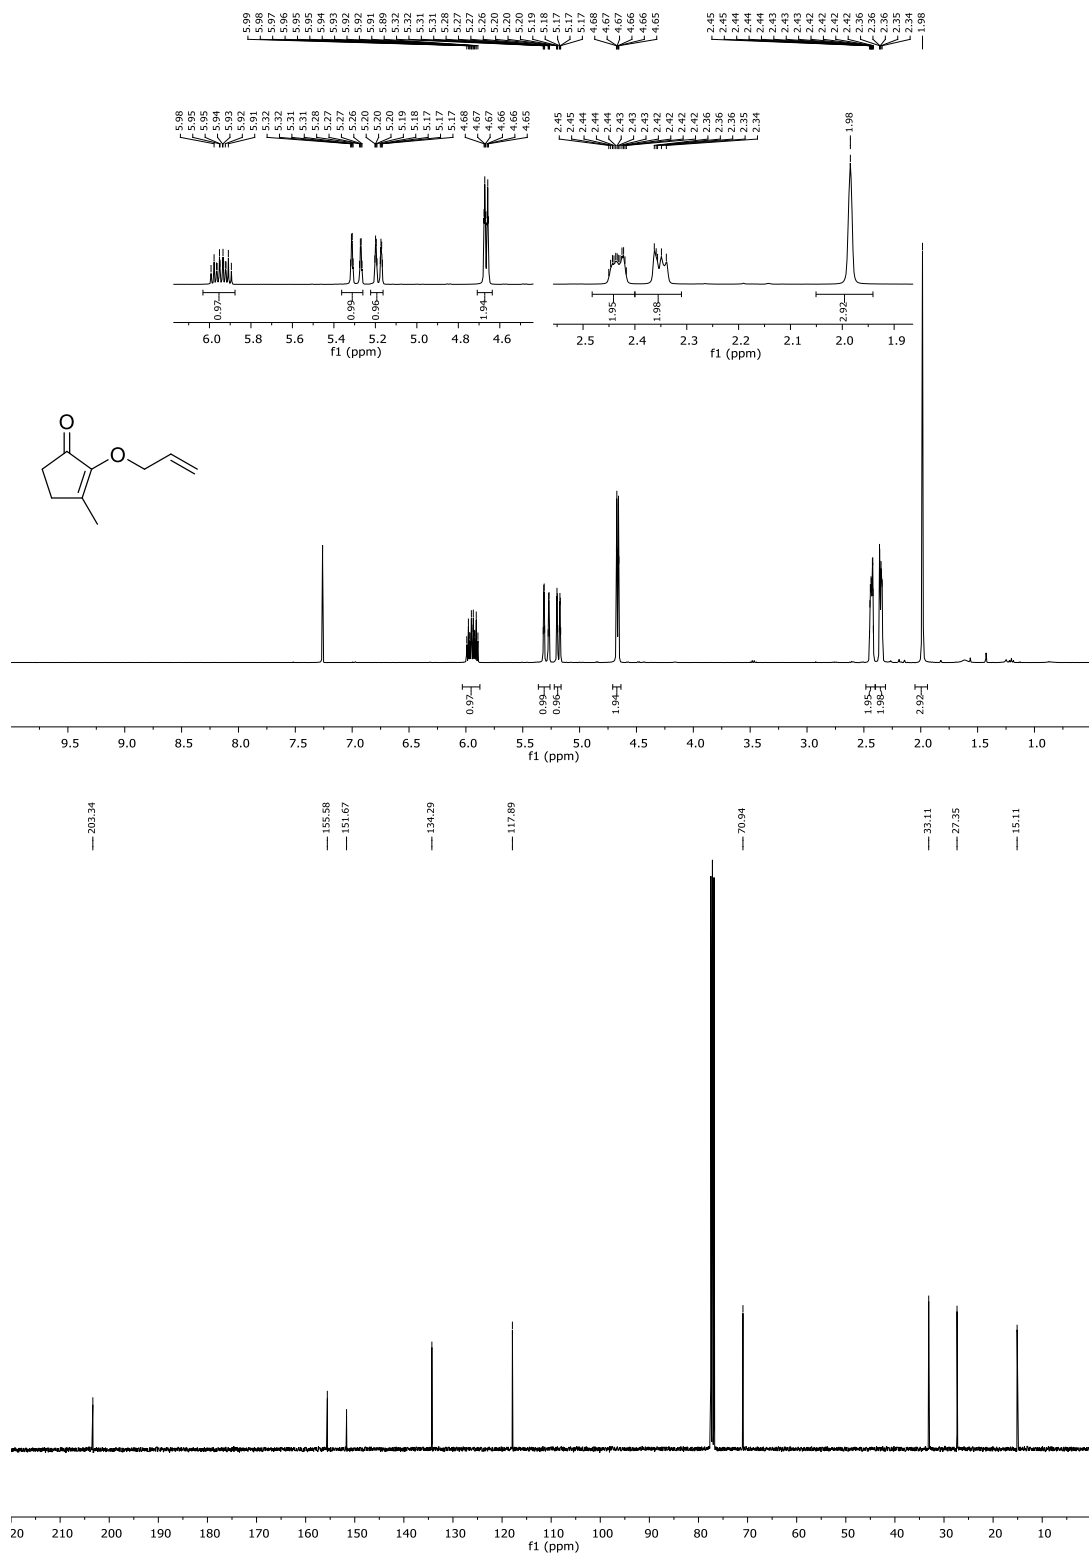

$^1\text{H}$  (500 MHz) and  $^{13}\text{C}\{^1\text{H}\}$  NMR (75 MHz) spectra of compound **2a** ( $\text{C}_6\text{D}_6$ )

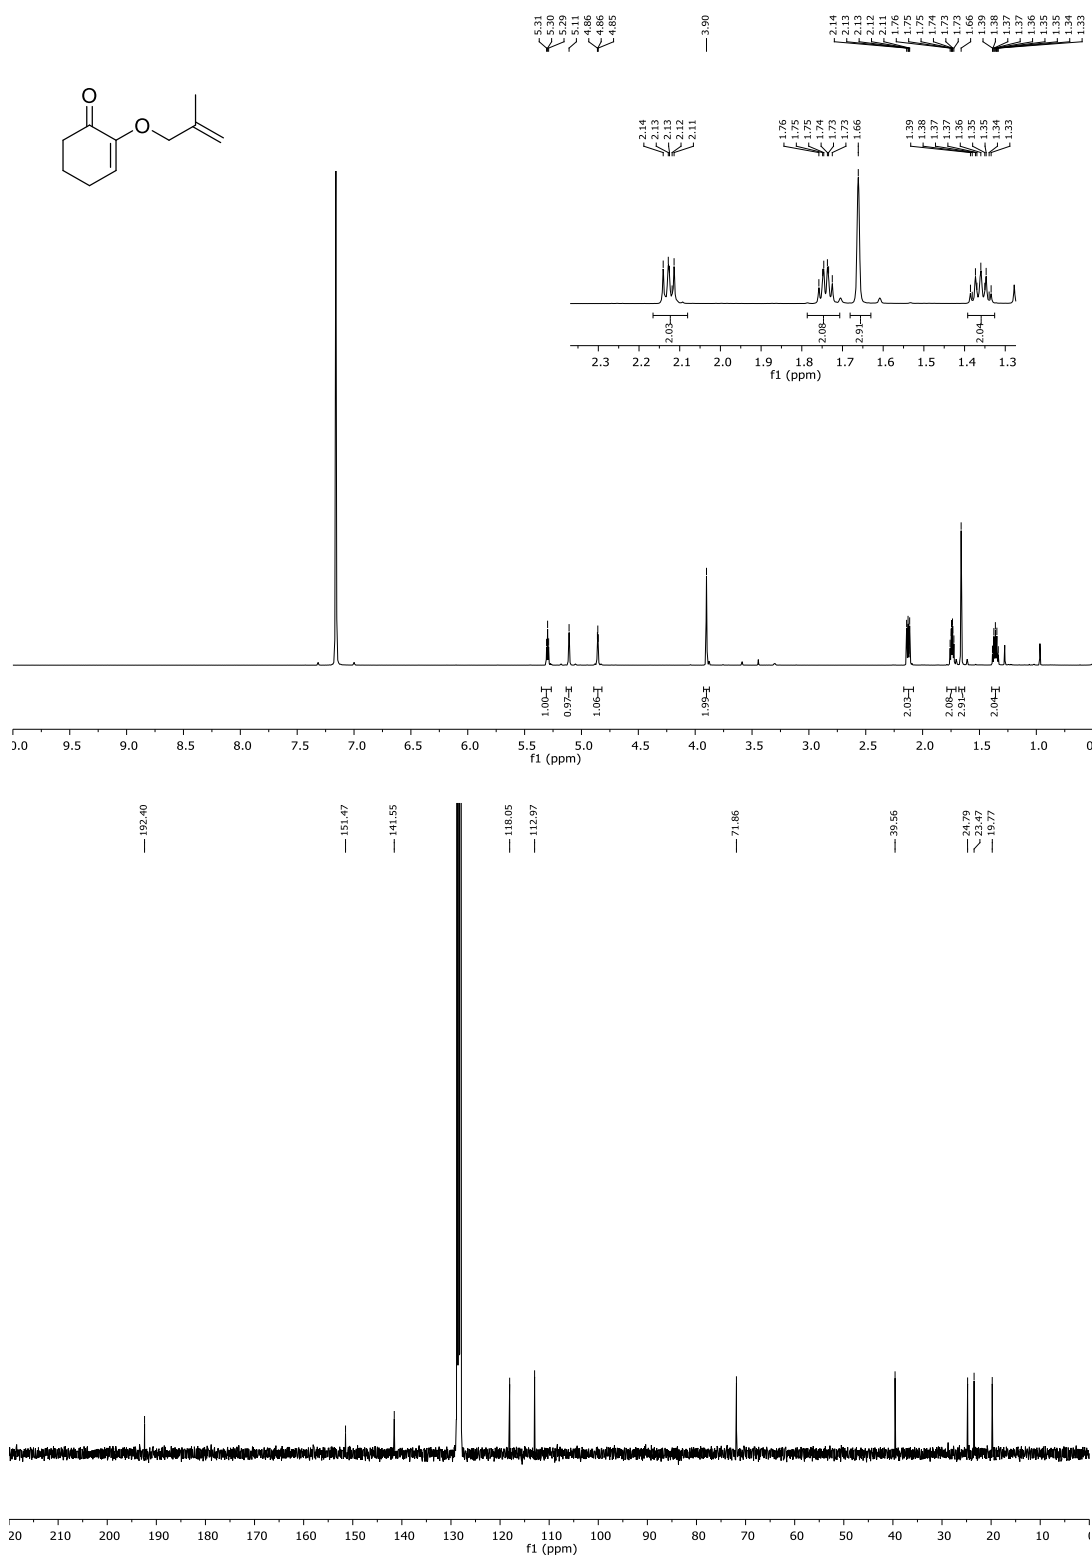

$^1\text{H}$  (500 MHz) and  $^{13}\text{C}\{^1\text{H}\}$  NMR (126 MHz) spectra of compound **2b** ( $\text{CDCl}_3$ )

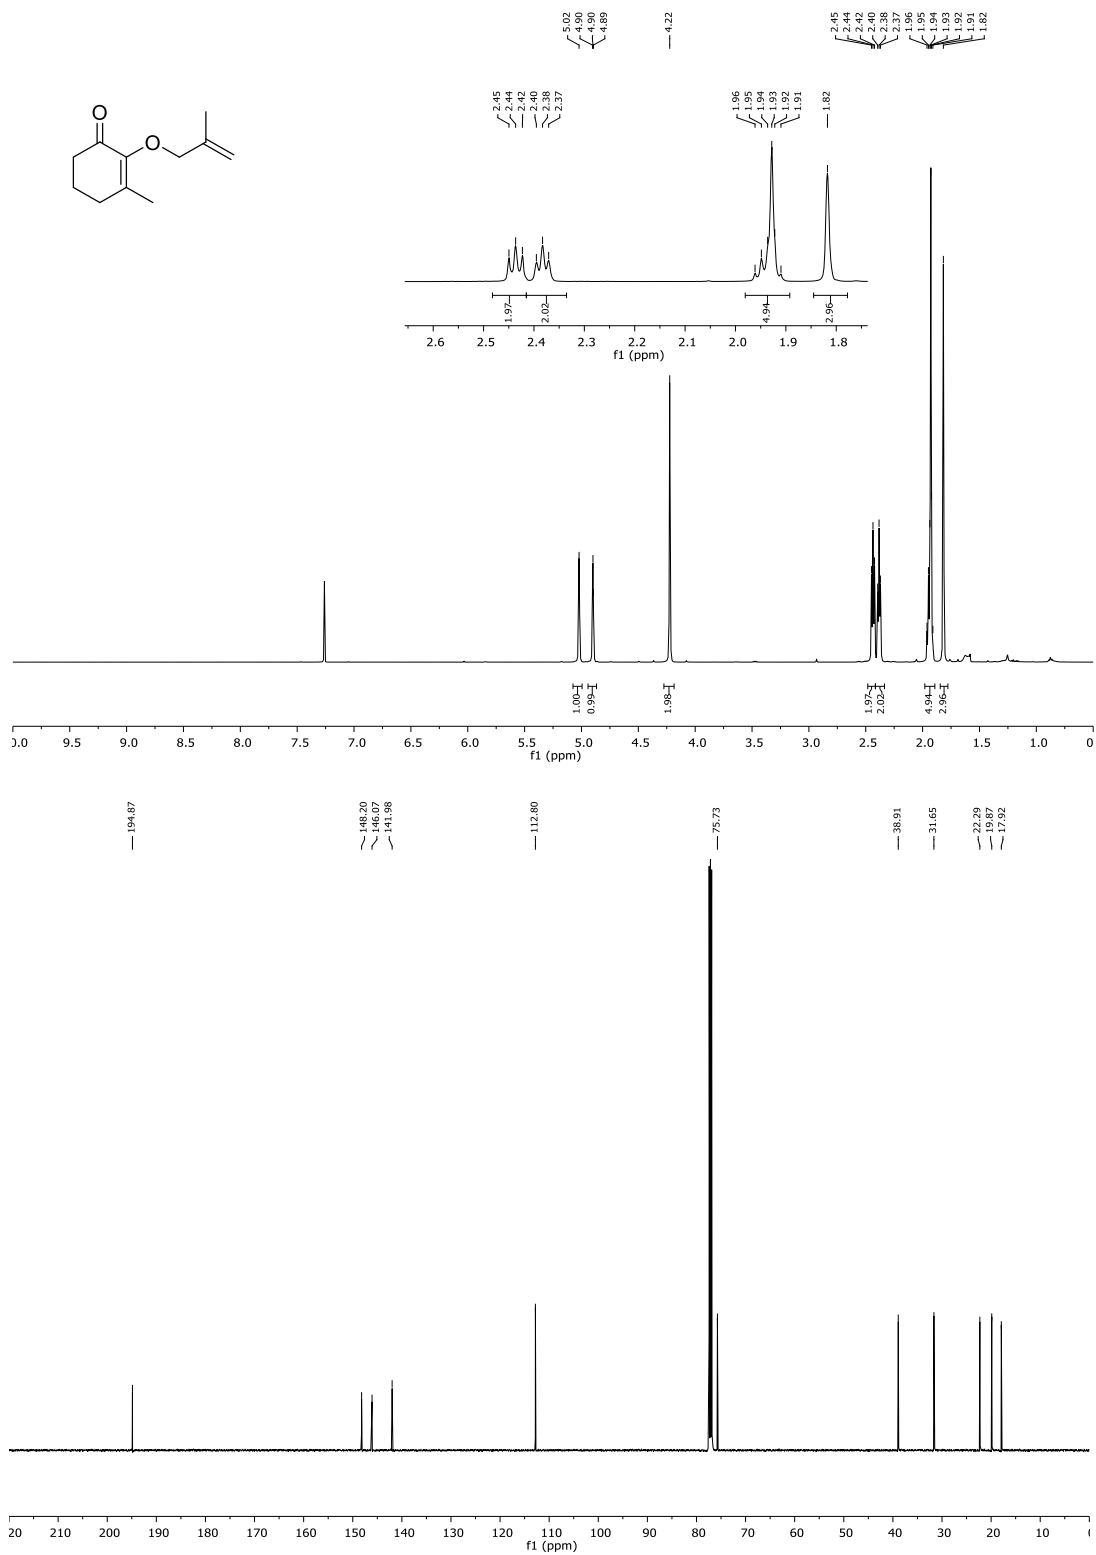



$^1\text{H}$  (500 MHz) and  $^{13}\text{C}\{^1\text{H}\}$  NMR (126 MHz) spectra of compound **2c** ( $\text{CDCl}_3$ )

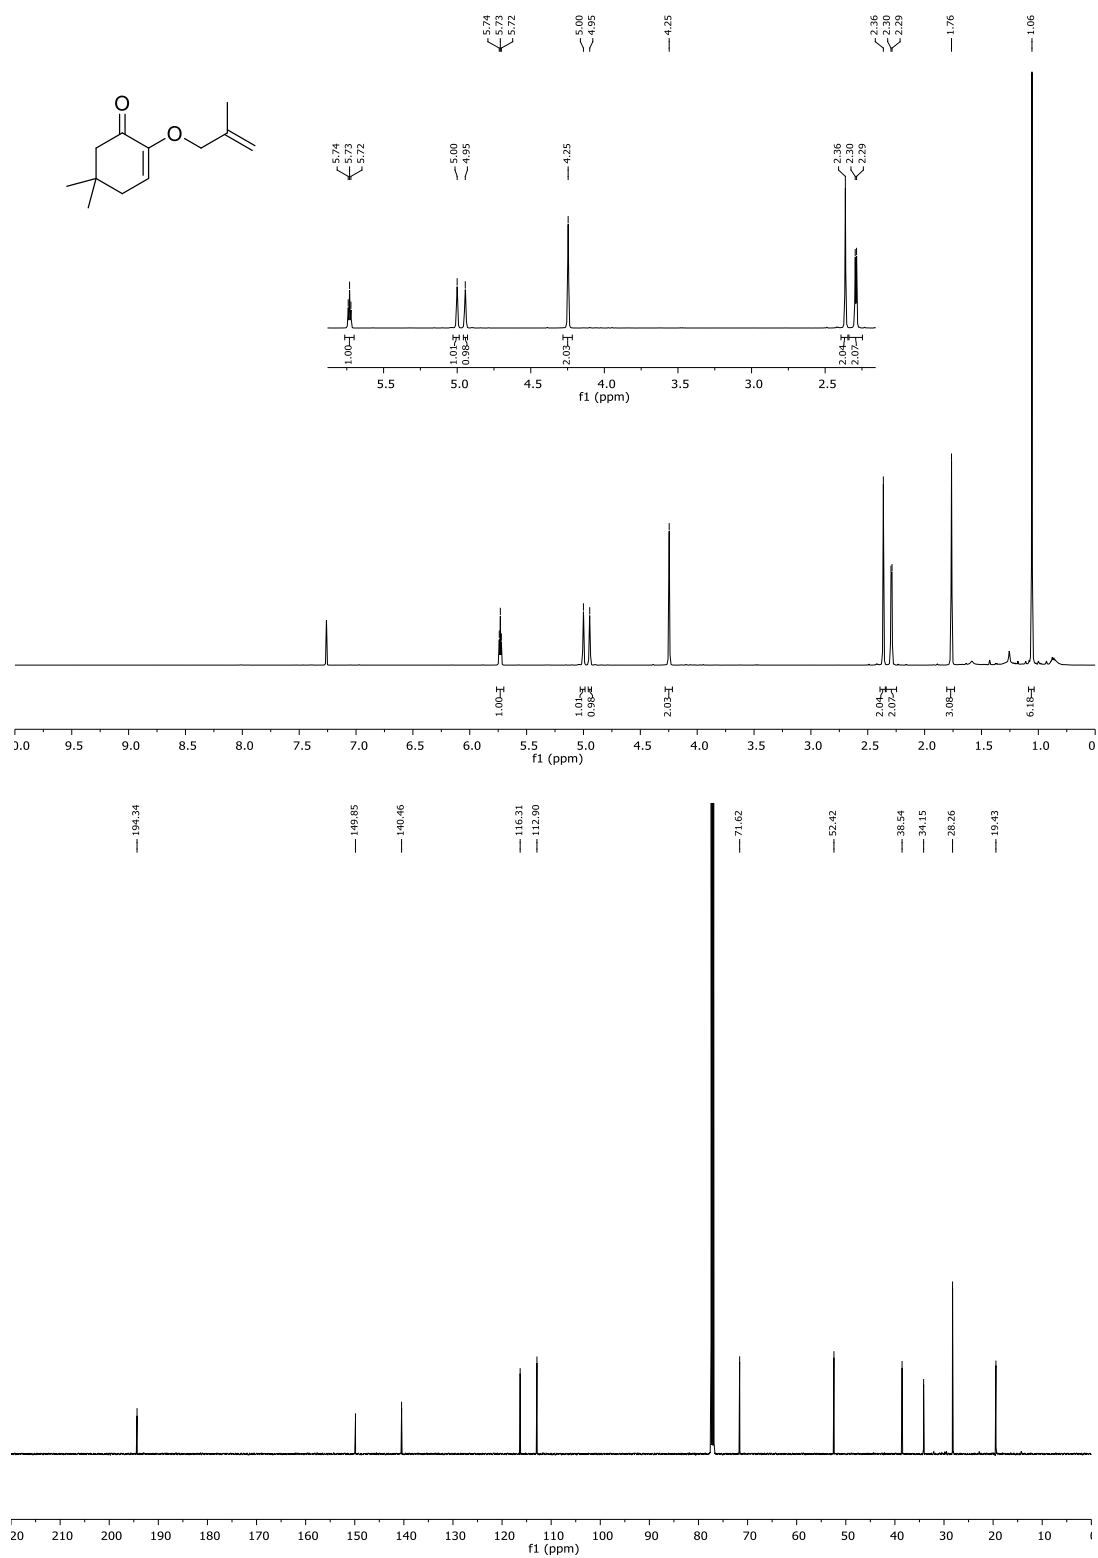

$^1\text{H}$  (500 MHz) and  $^{13}\text{C}\{^1\text{H}\}$  NMR (126 MHz) spectra of compound **2d** ( $\text{CDCl}_3$ )

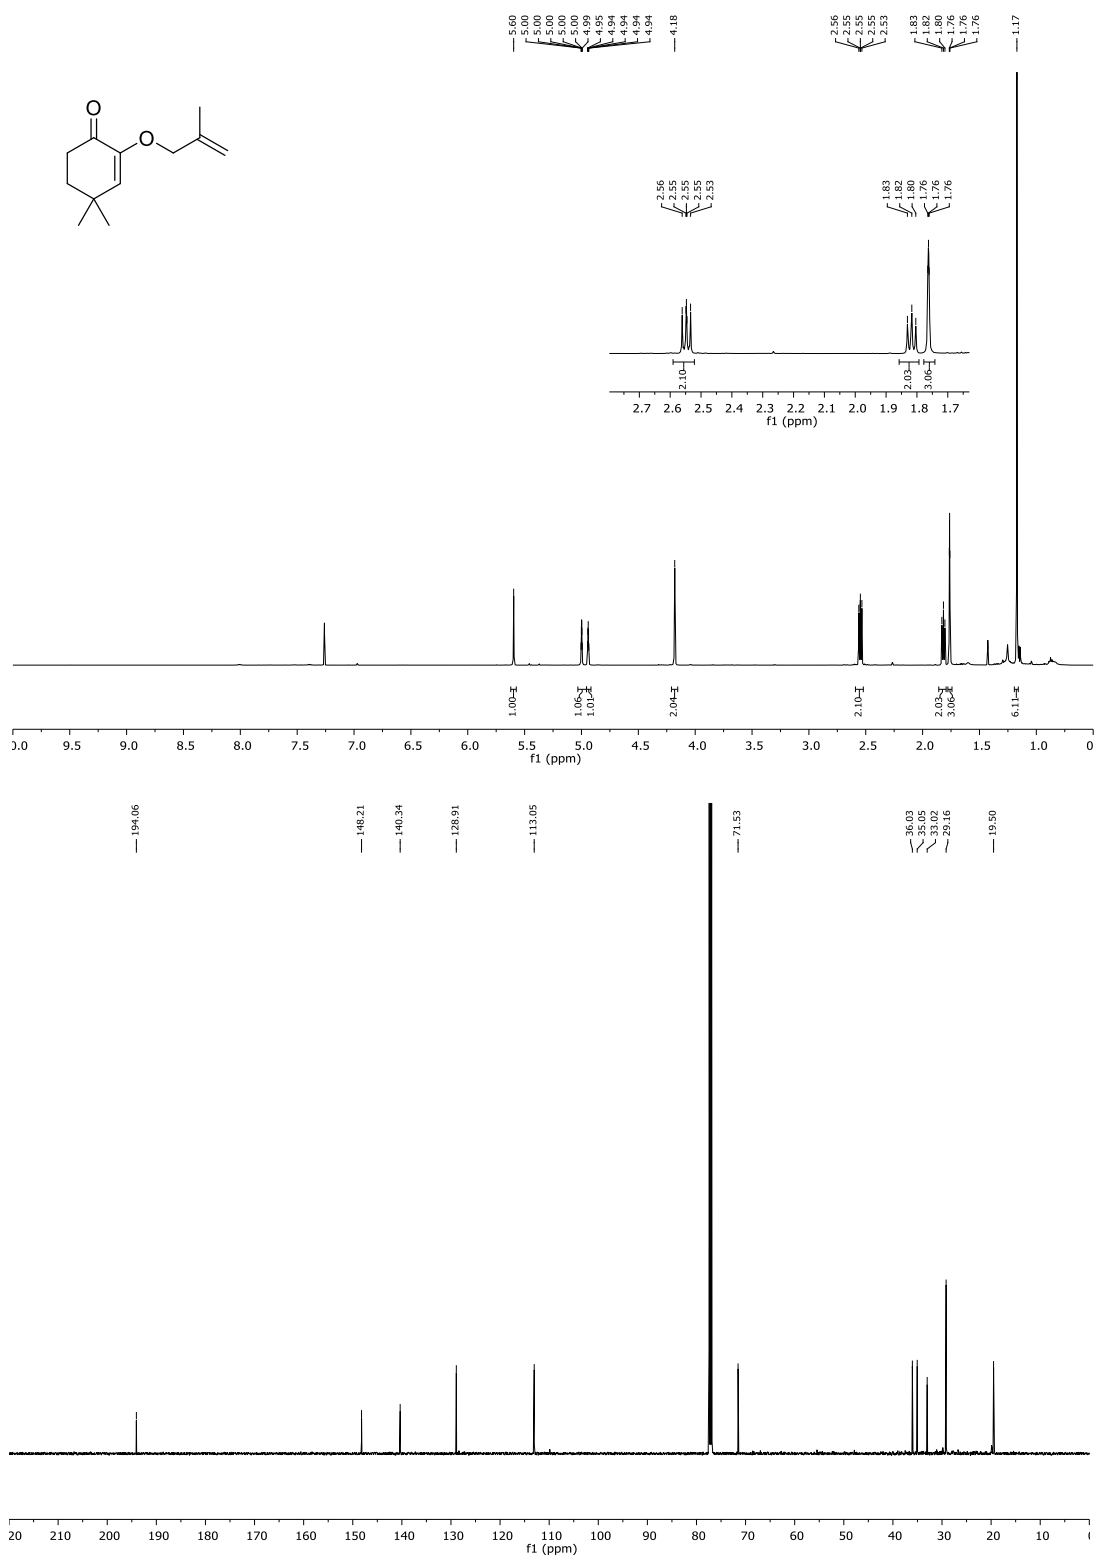

$^1\text{H}$  (500 MHz) and  $^{13}\text{C}\{^1\text{H}\}$  NMR (101 MHz) spectra of compound **2e** ( $\text{CDCl}_3$ )

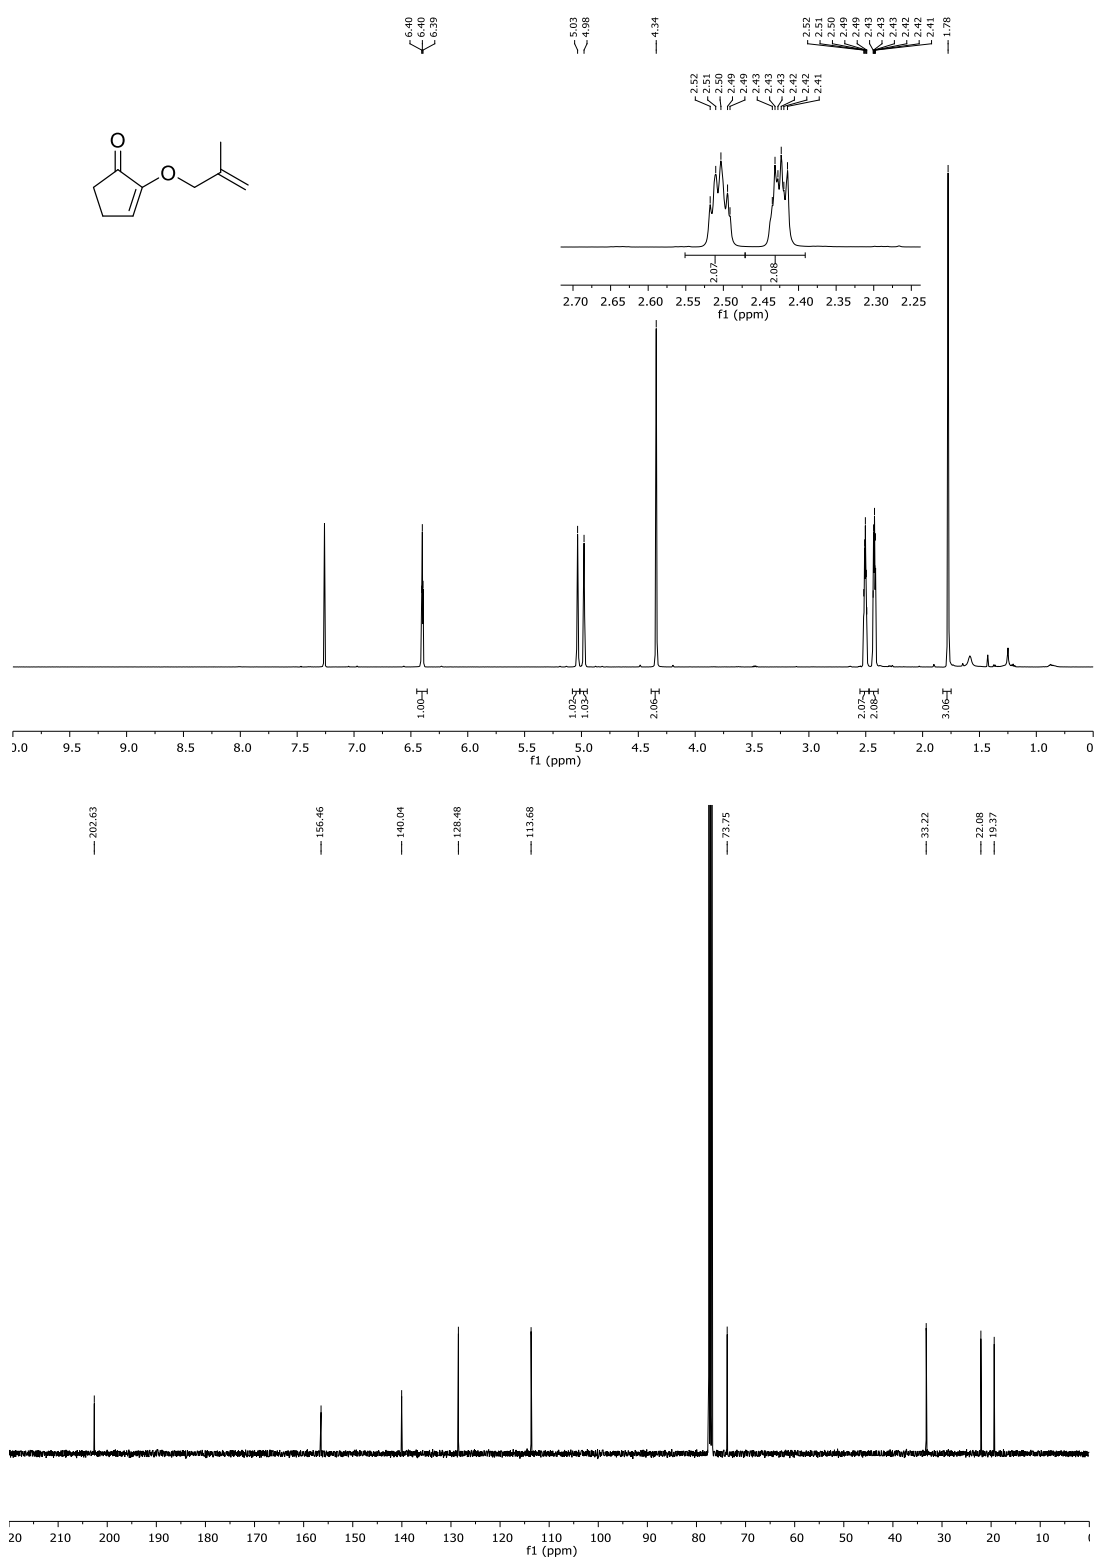

$^1\text{H}$  (300 MHz) and  $^{13}\text{C}\{^1\text{H}\}$  NMR (75 MHz) spectra of compound **2f** ( $\text{C}_6\text{D}_6$ )

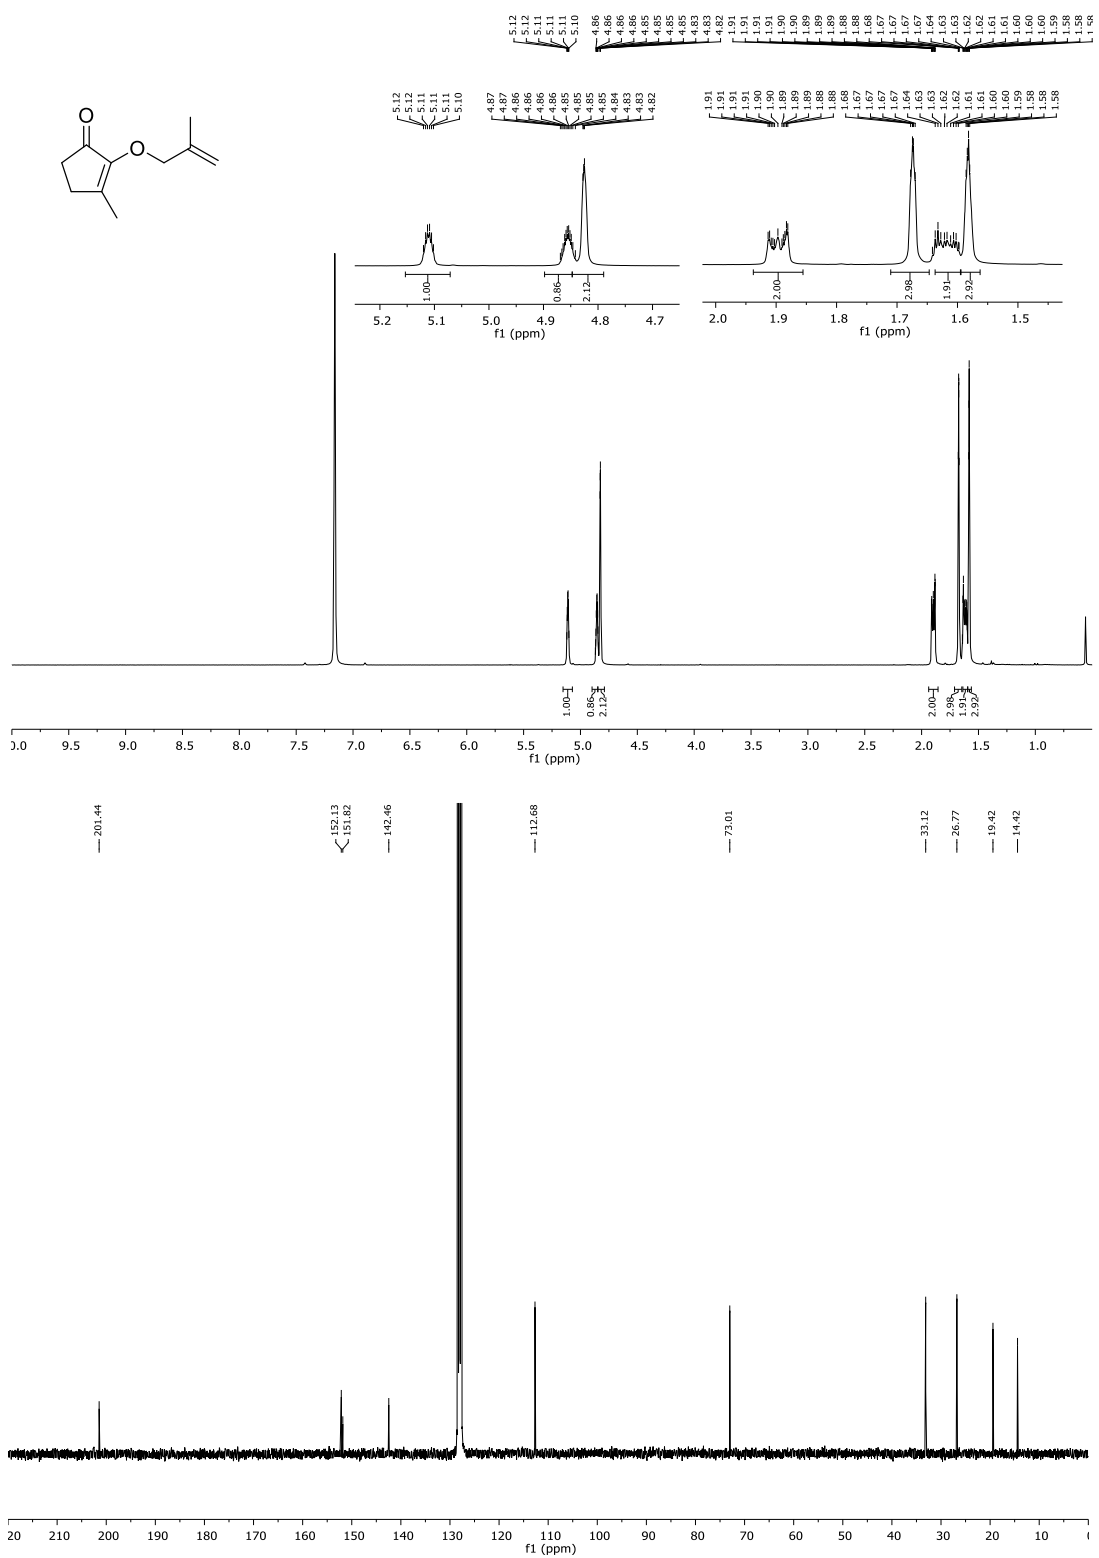

$^1\text{H}$  (500 MHz) and  $^{13}\text{C}\{^1\text{H}\}$  NMR (101 MHz) spectra of compound **3a** ( $\text{CDCl}_3$ )

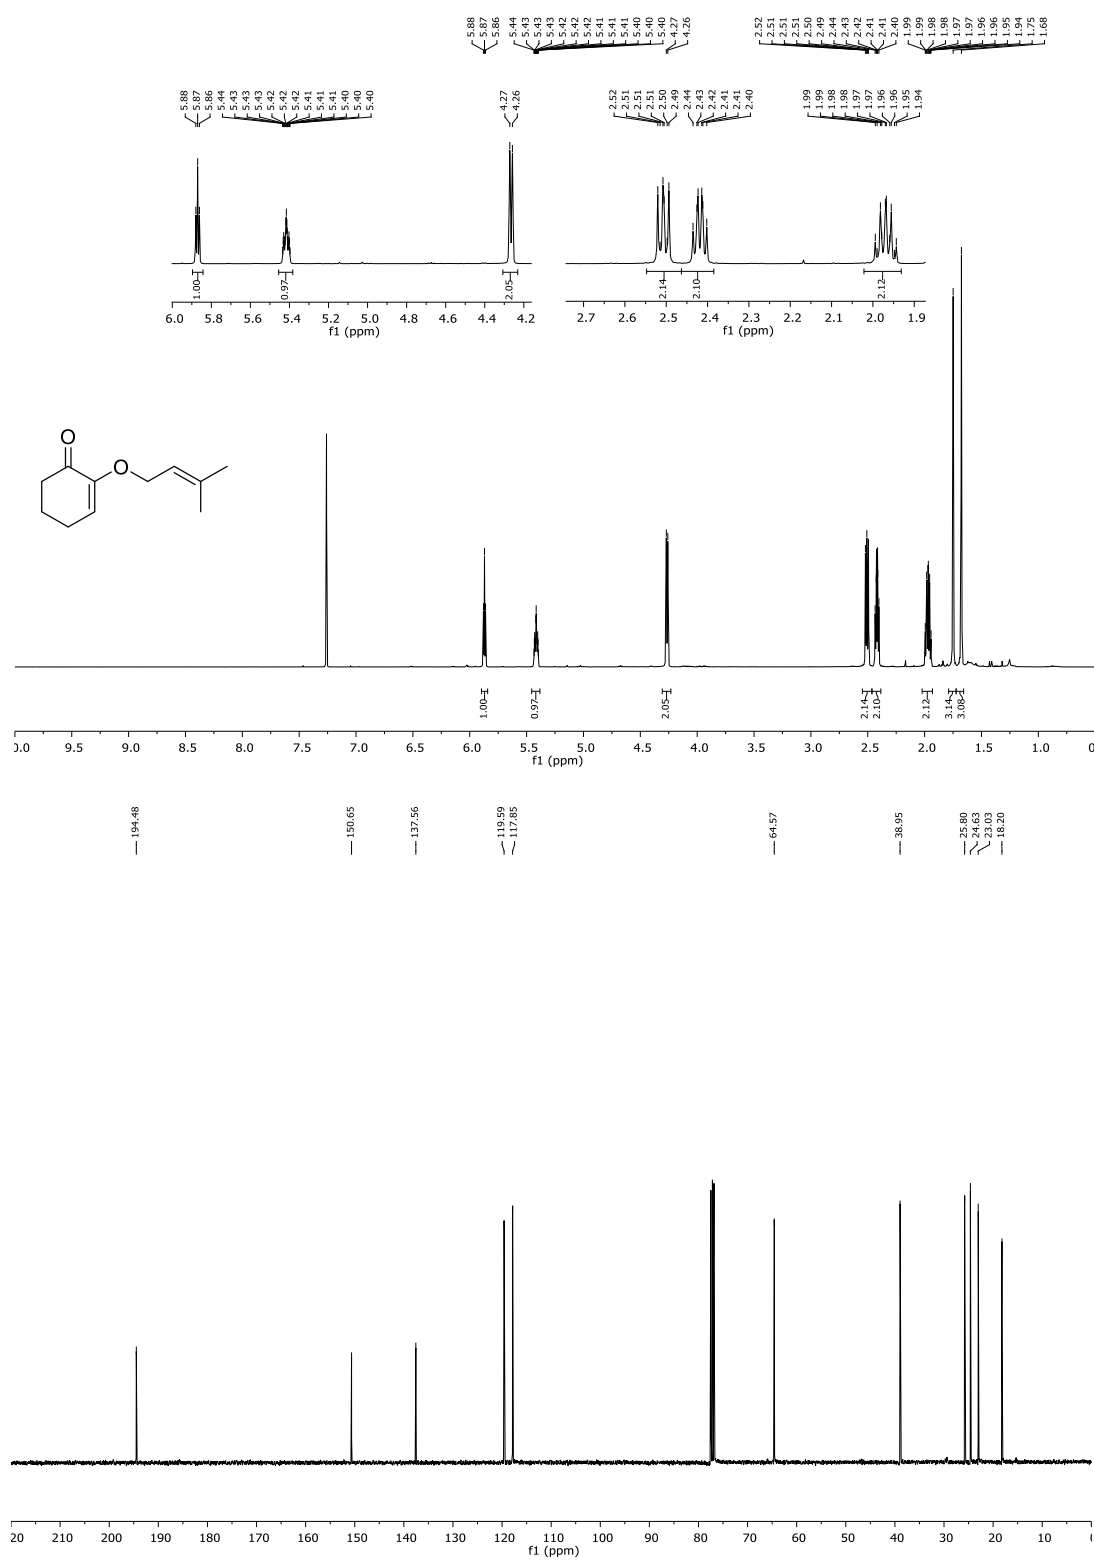

$^1\text{H}$  (500 MHz) and  $^{13}\text{C}\{^1\text{H}\}$  NMR (126 MHz) spectra of compound **3b** ( $\text{CDCl}_3$ )

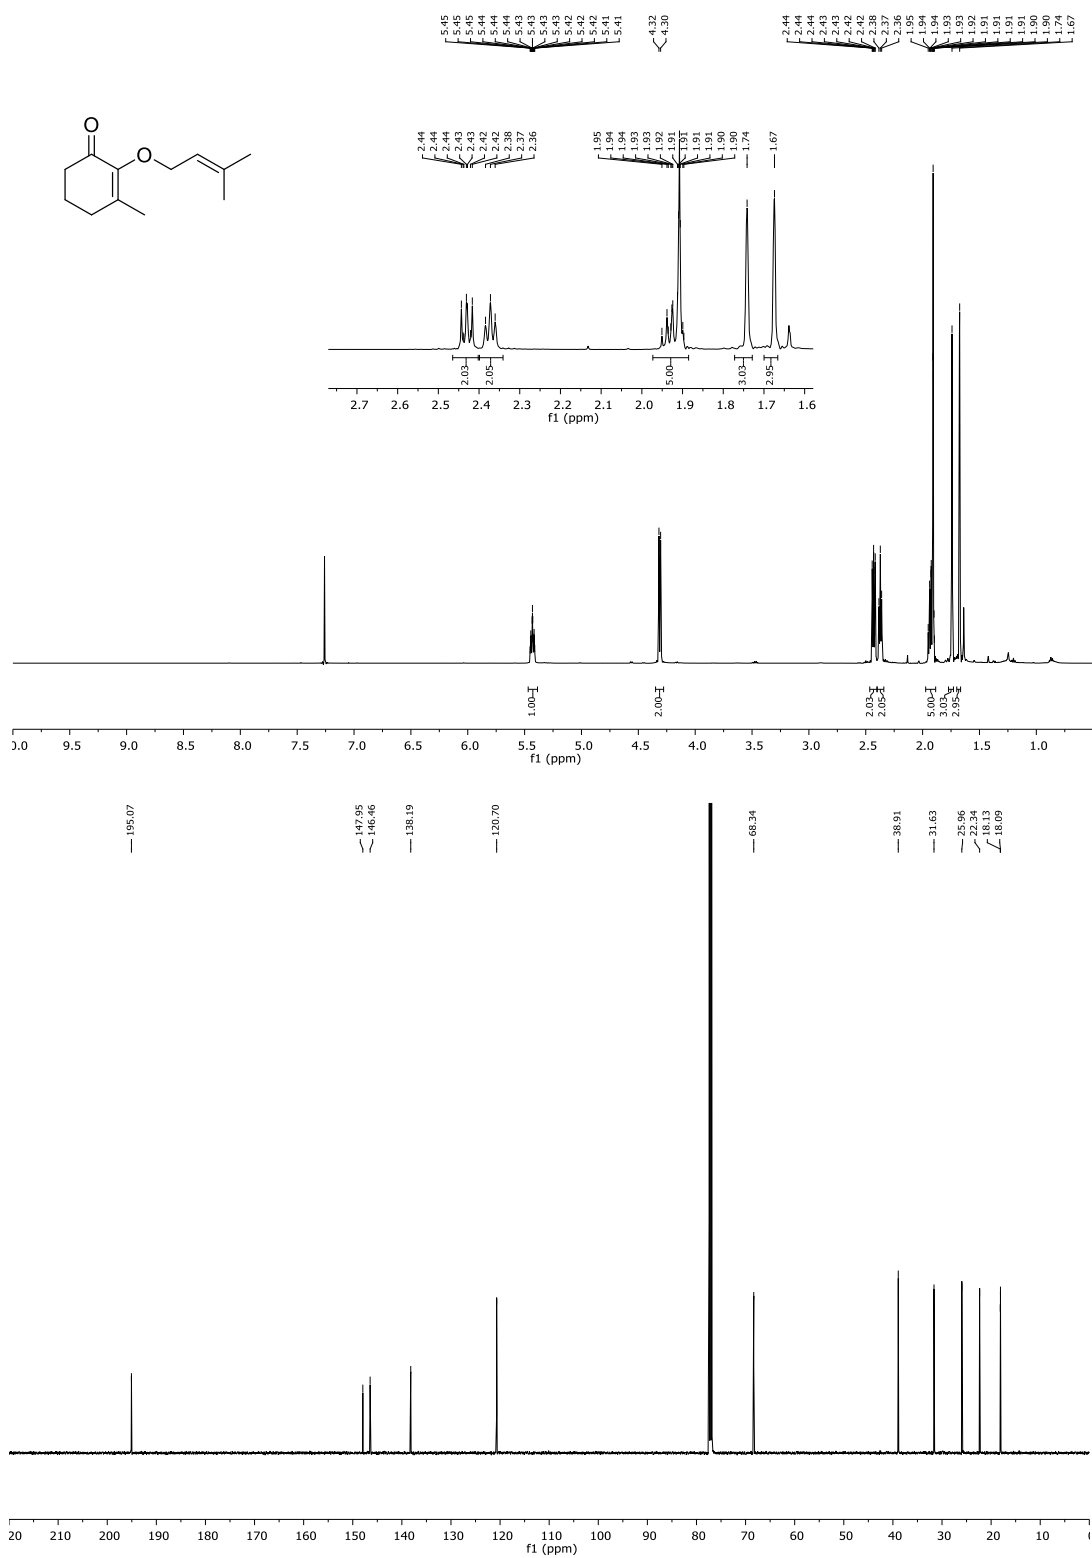

$^1\text{H}$  (500 MHz) and  $^{13}\text{C}\{^1\text{H}\}$  NMR (126 MHz) spectra of compound **3c** ( $\text{CDCl}_3$ )

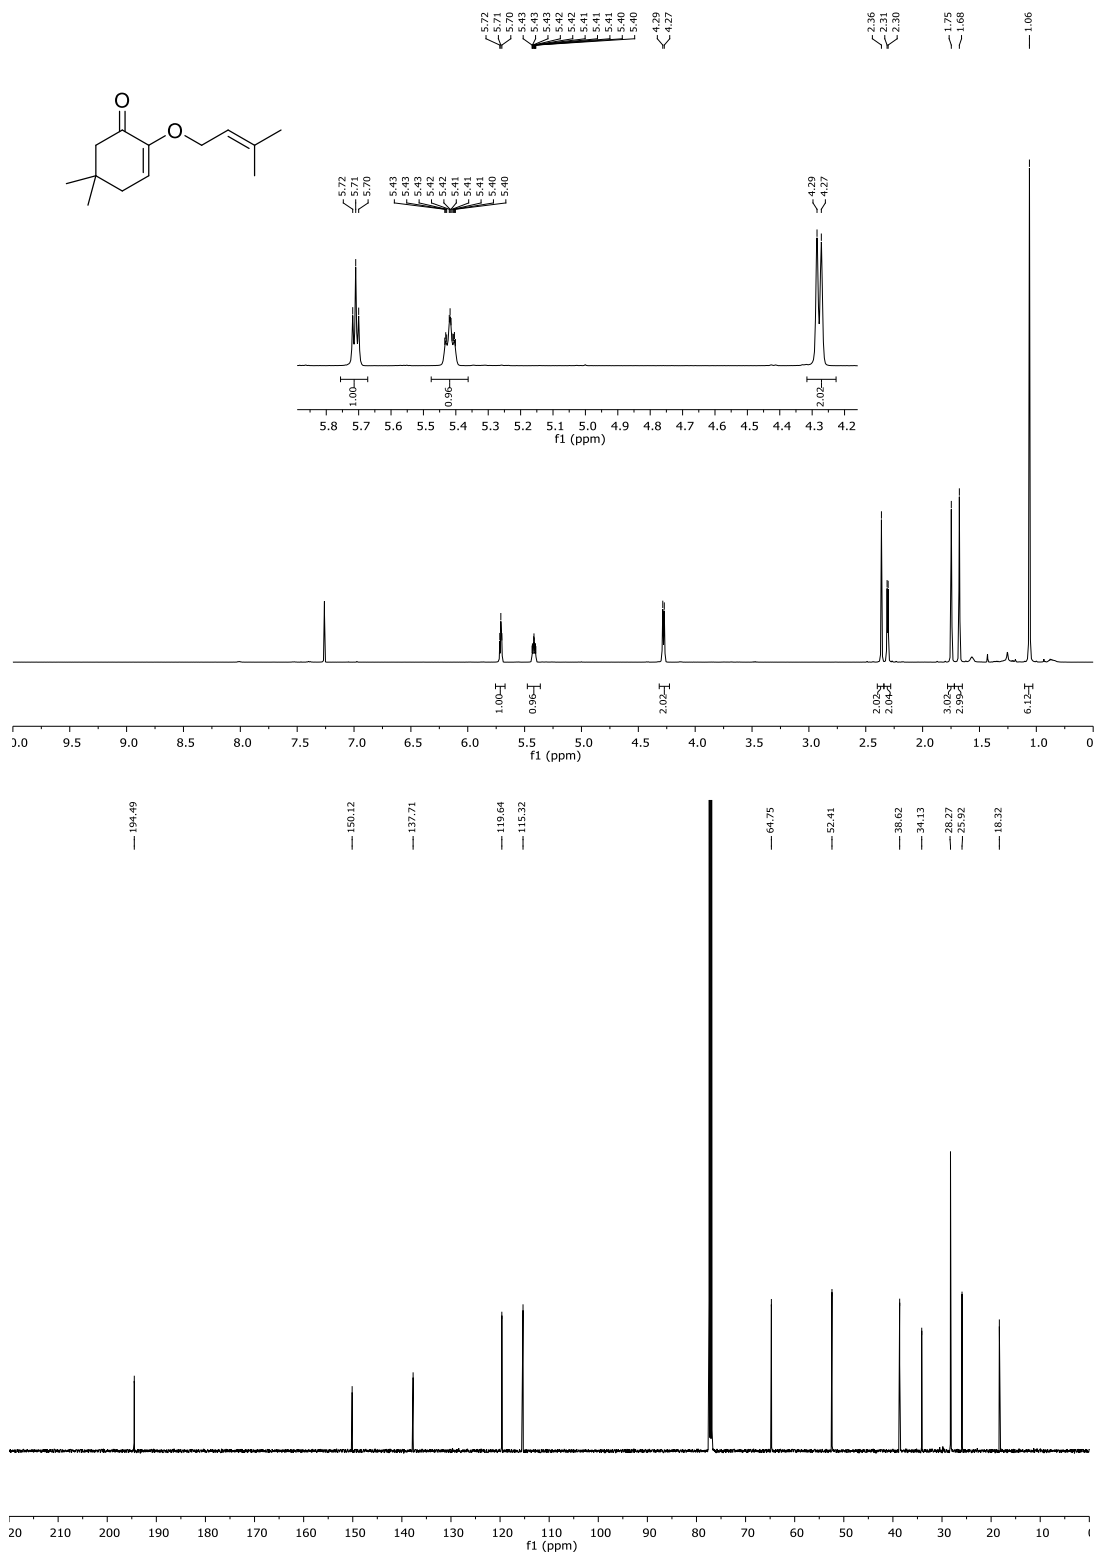

$^1\text{H}$  (500 MHz) and  $^{13}\text{C}\{^1\text{H}\}$  NMR (126 MHz) spectra of compound **3e** ( $\text{CDCl}_3$ )

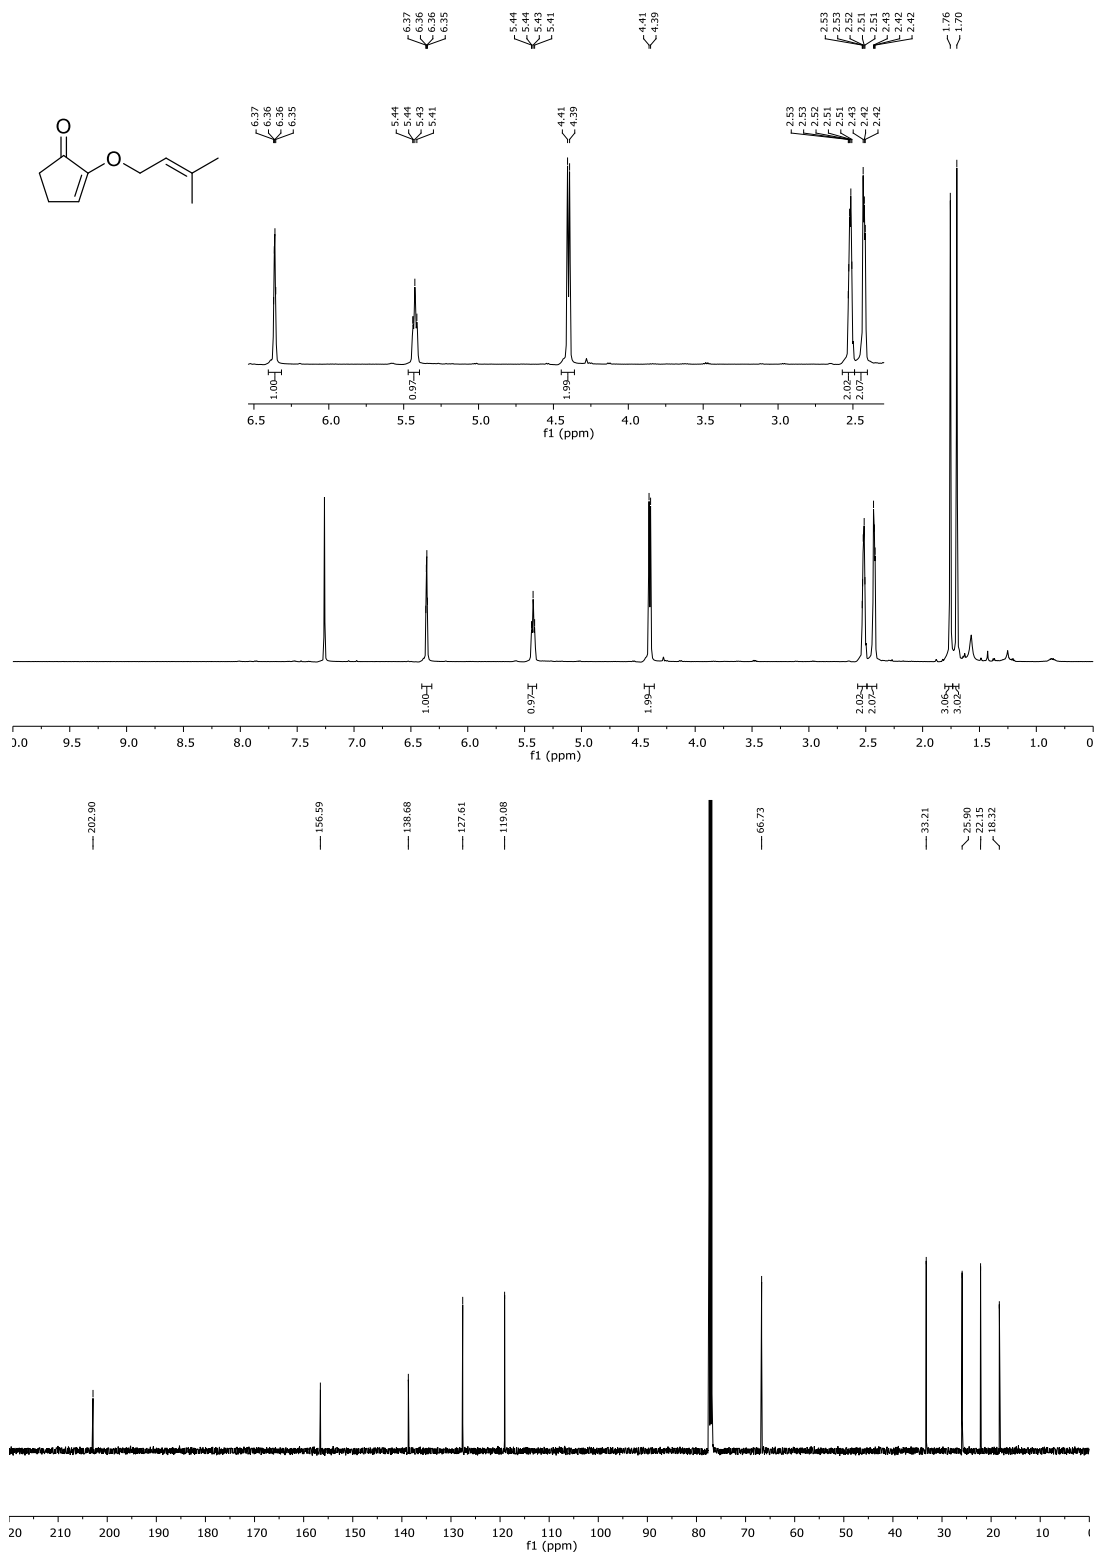





$^1\text{H}$  (300 MHz) and  $^{13}\text{C}\{^1\text{H}\}$  NMR (75 MHz) spectra of **3-Ethoxy-5,5-dimethylcyclohex-2-en-1-one** ( $\text{CDCl}_3$ )

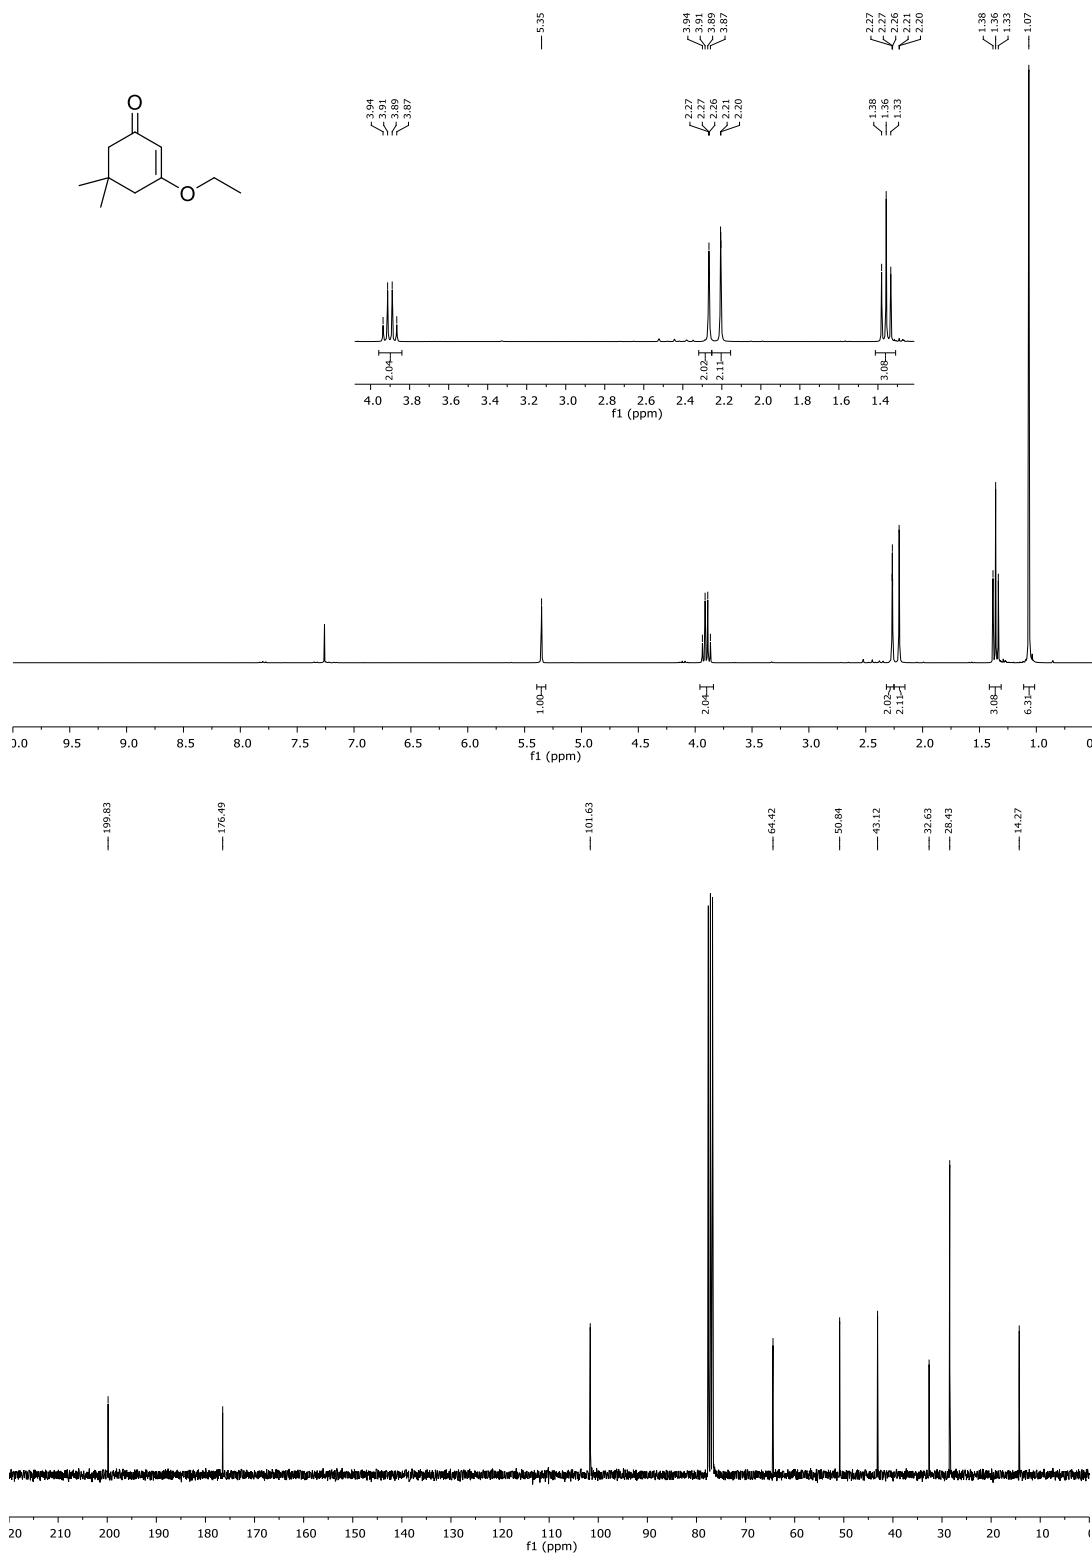

$^1\text{H}$  (400 MHz) and  $^{13}\text{C}\{^1\text{H}\}$  NMR (101 MHz) spectra of **5,5-Dimethylcyclohex-2-en-1-one**  
( $\text{CDCl}_3$ )

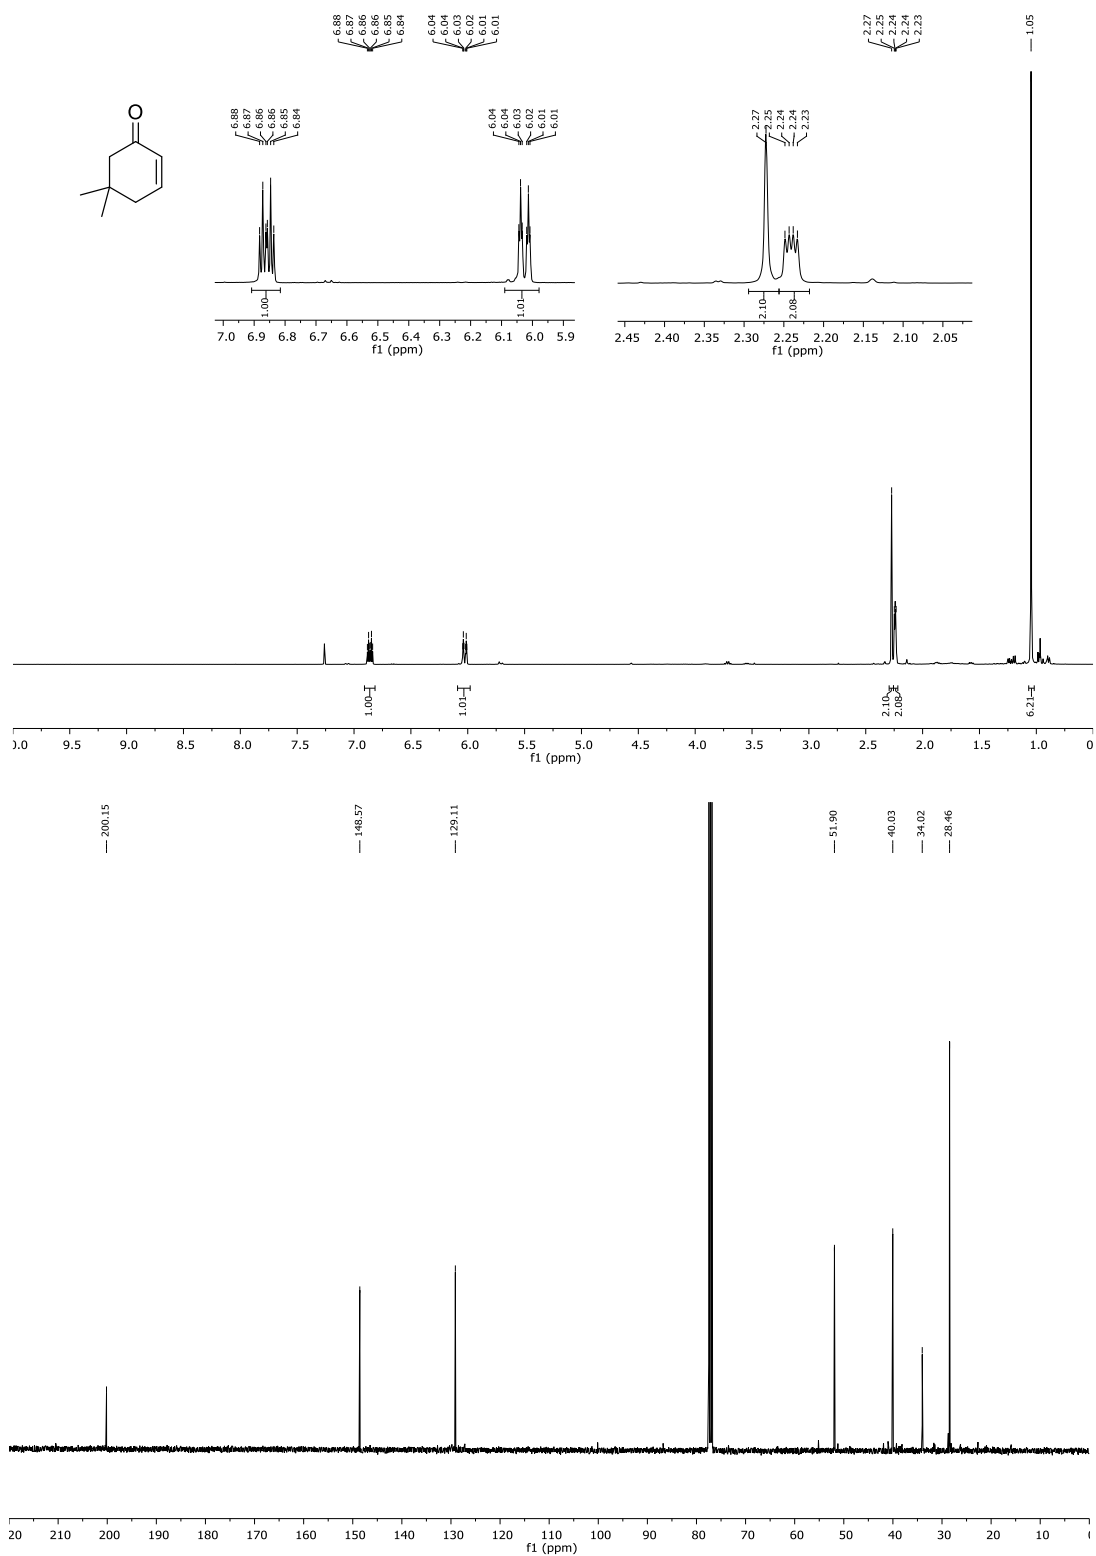

$^1\text{H}$  (400 MHz) and  $^{13}\text{C}\{^1\text{H}\}$  NMR (101 MHz) spectra of compound **4c** ( $\text{CDCl}_3$ )

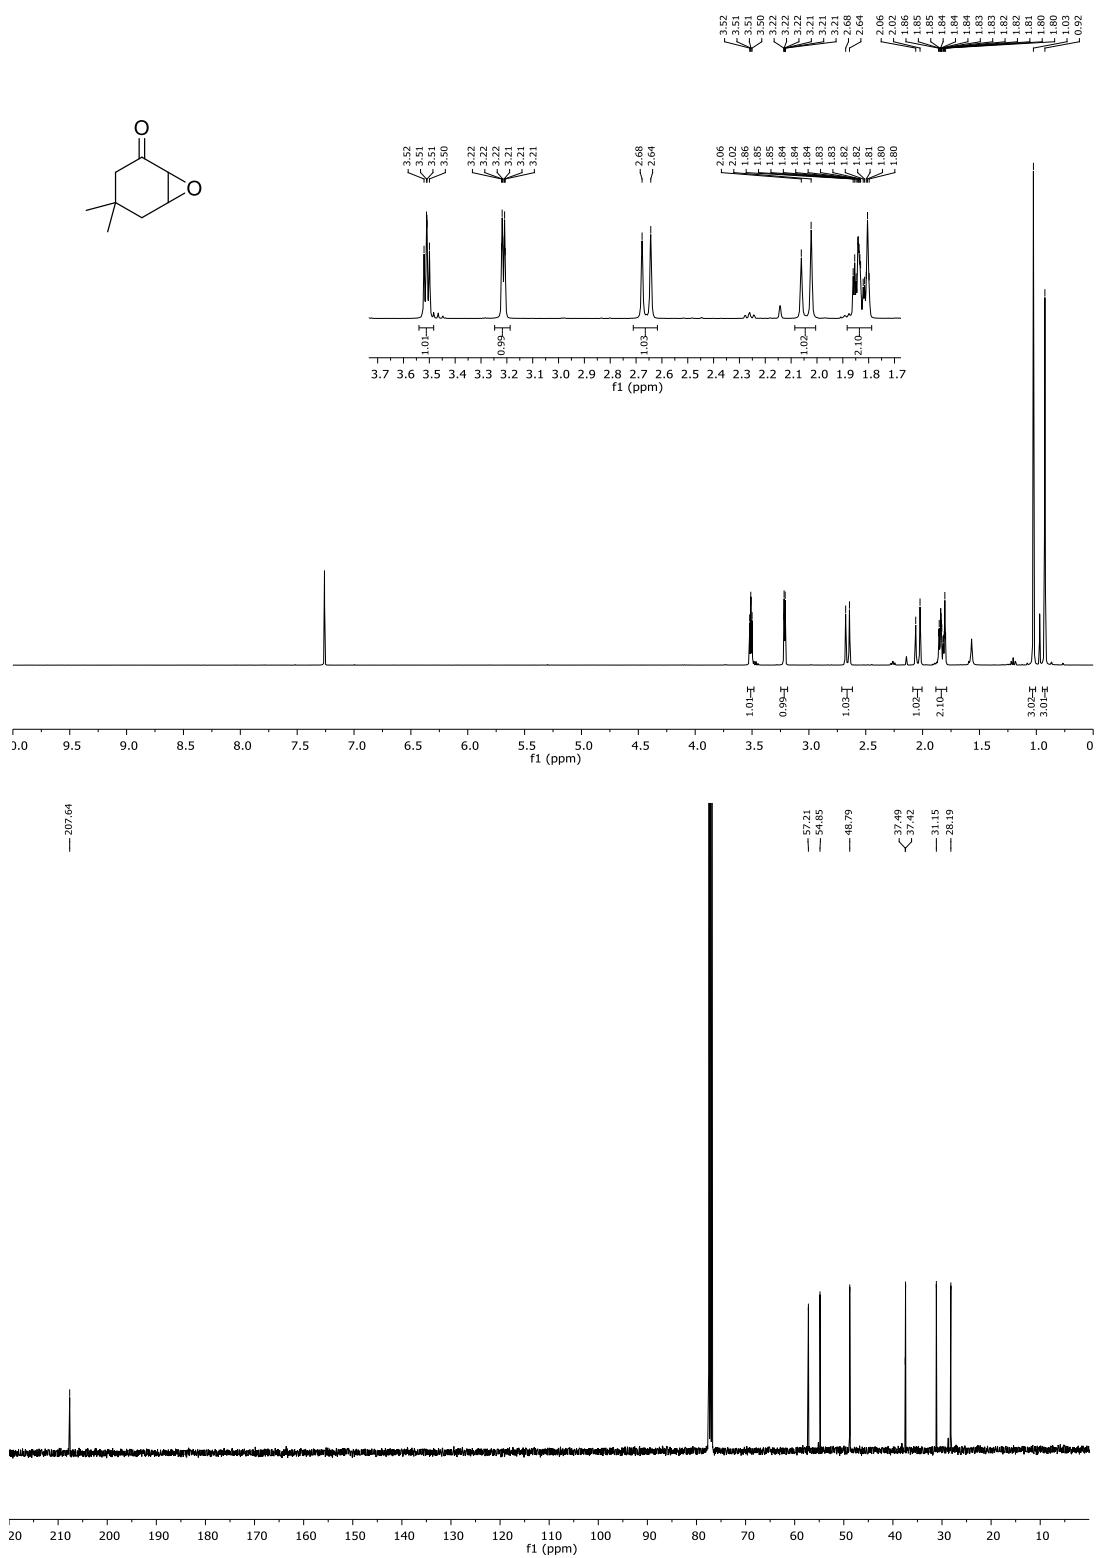

$^1\text{H}$  (500 MHz) and  $^{13}\text{C}\{^1\text{H}\}$  NMR (126 MHz) spectra of compound **4d** ( $\text{CDCl}_3$ )

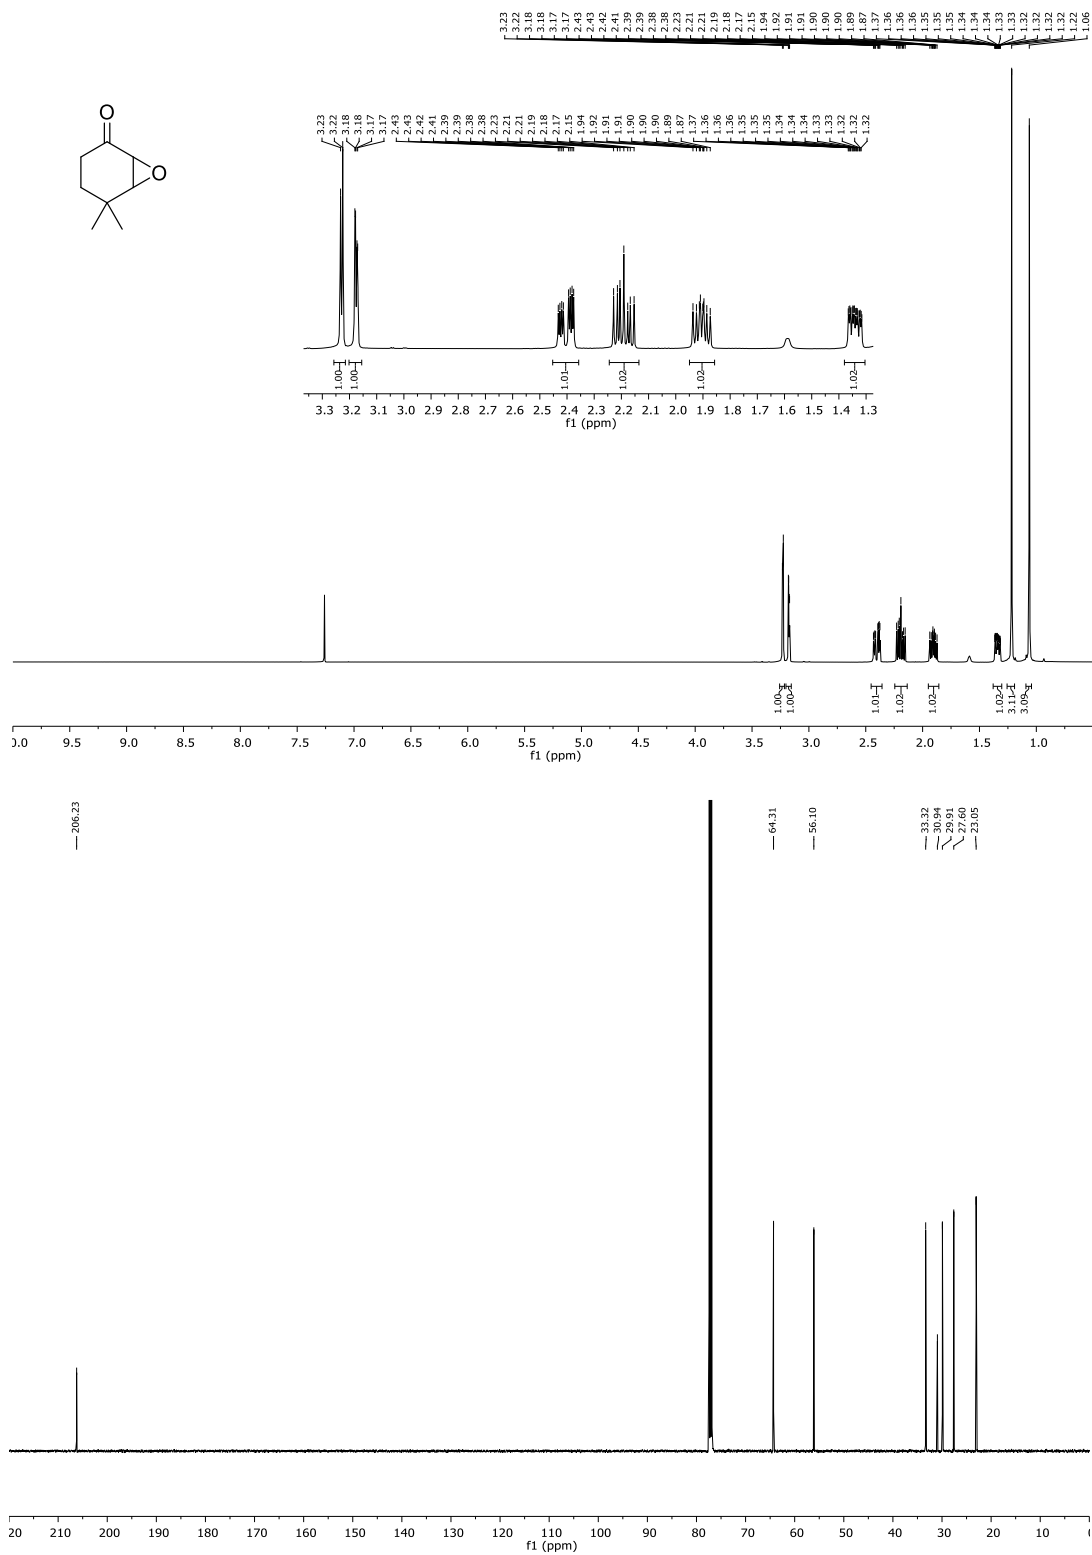

$^1\text{H}$  (500 MHz) and  $^{13}\text{C}\{^1\text{H}\}$  NMR (101 MHz) spectra of compound **8a** ( $\text{CDCl}_3$ )

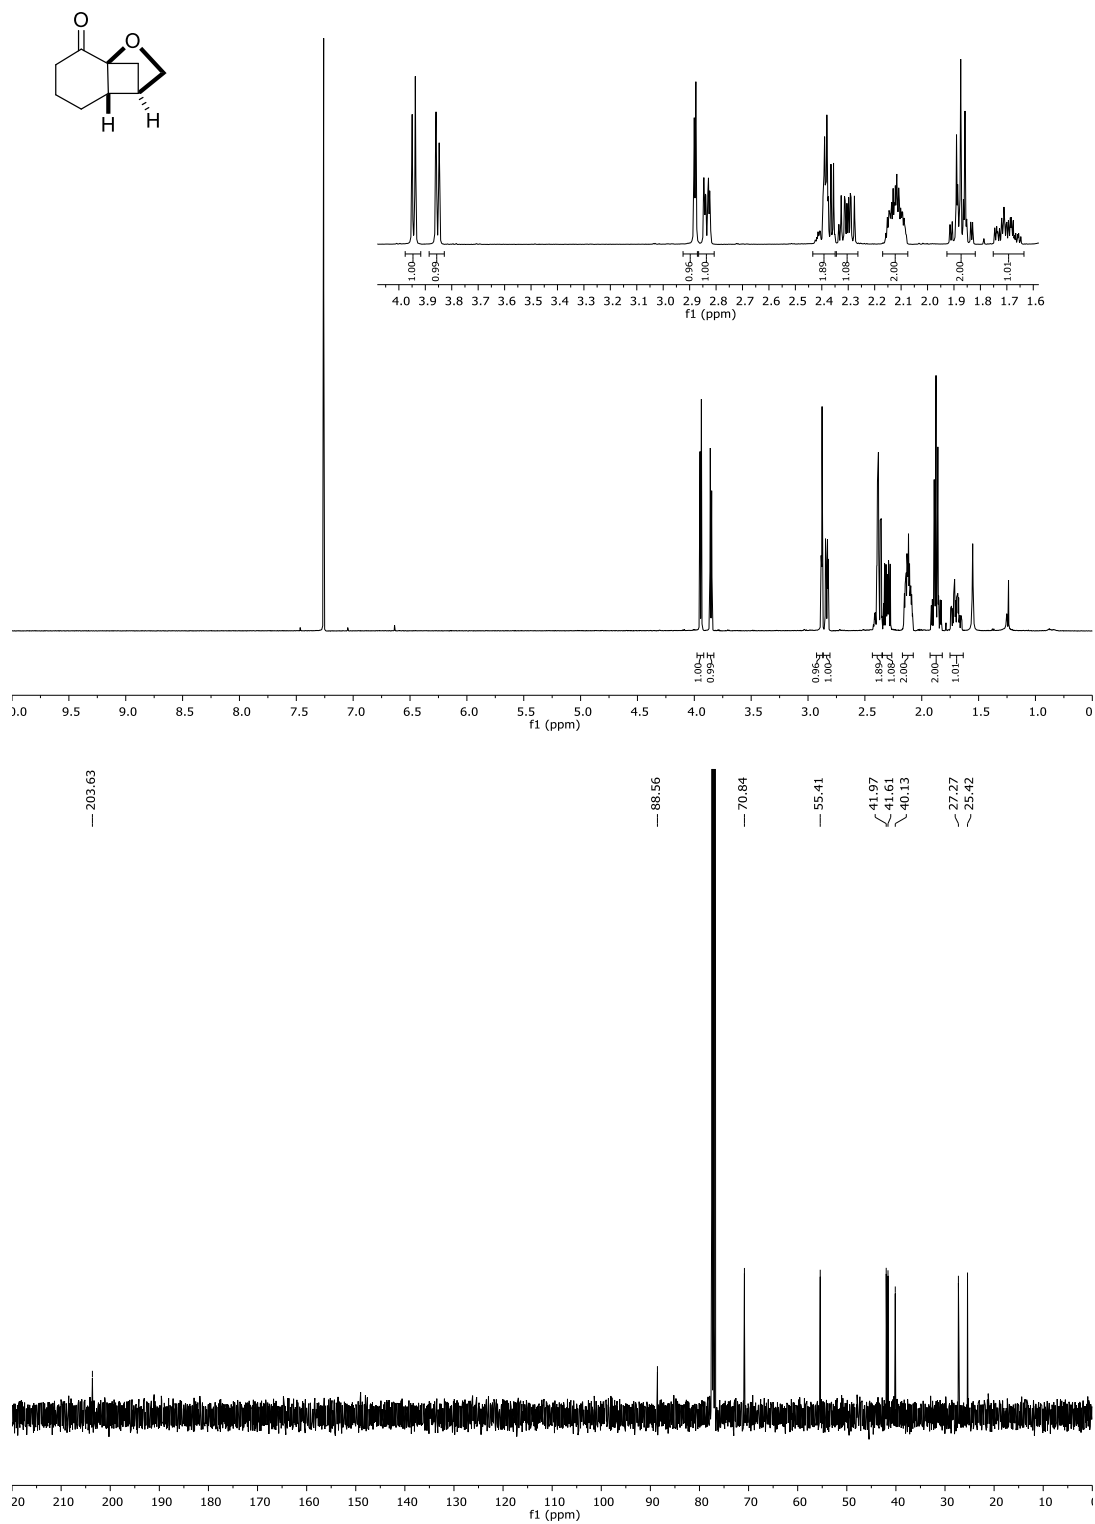

$^1\text{H}$  (400 MHz) and  $^{13}\text{C}\{^1\text{H}\}$  NMR (126 MHz) spectra of compound **8b** ( $\text{CDCl}_3$ )

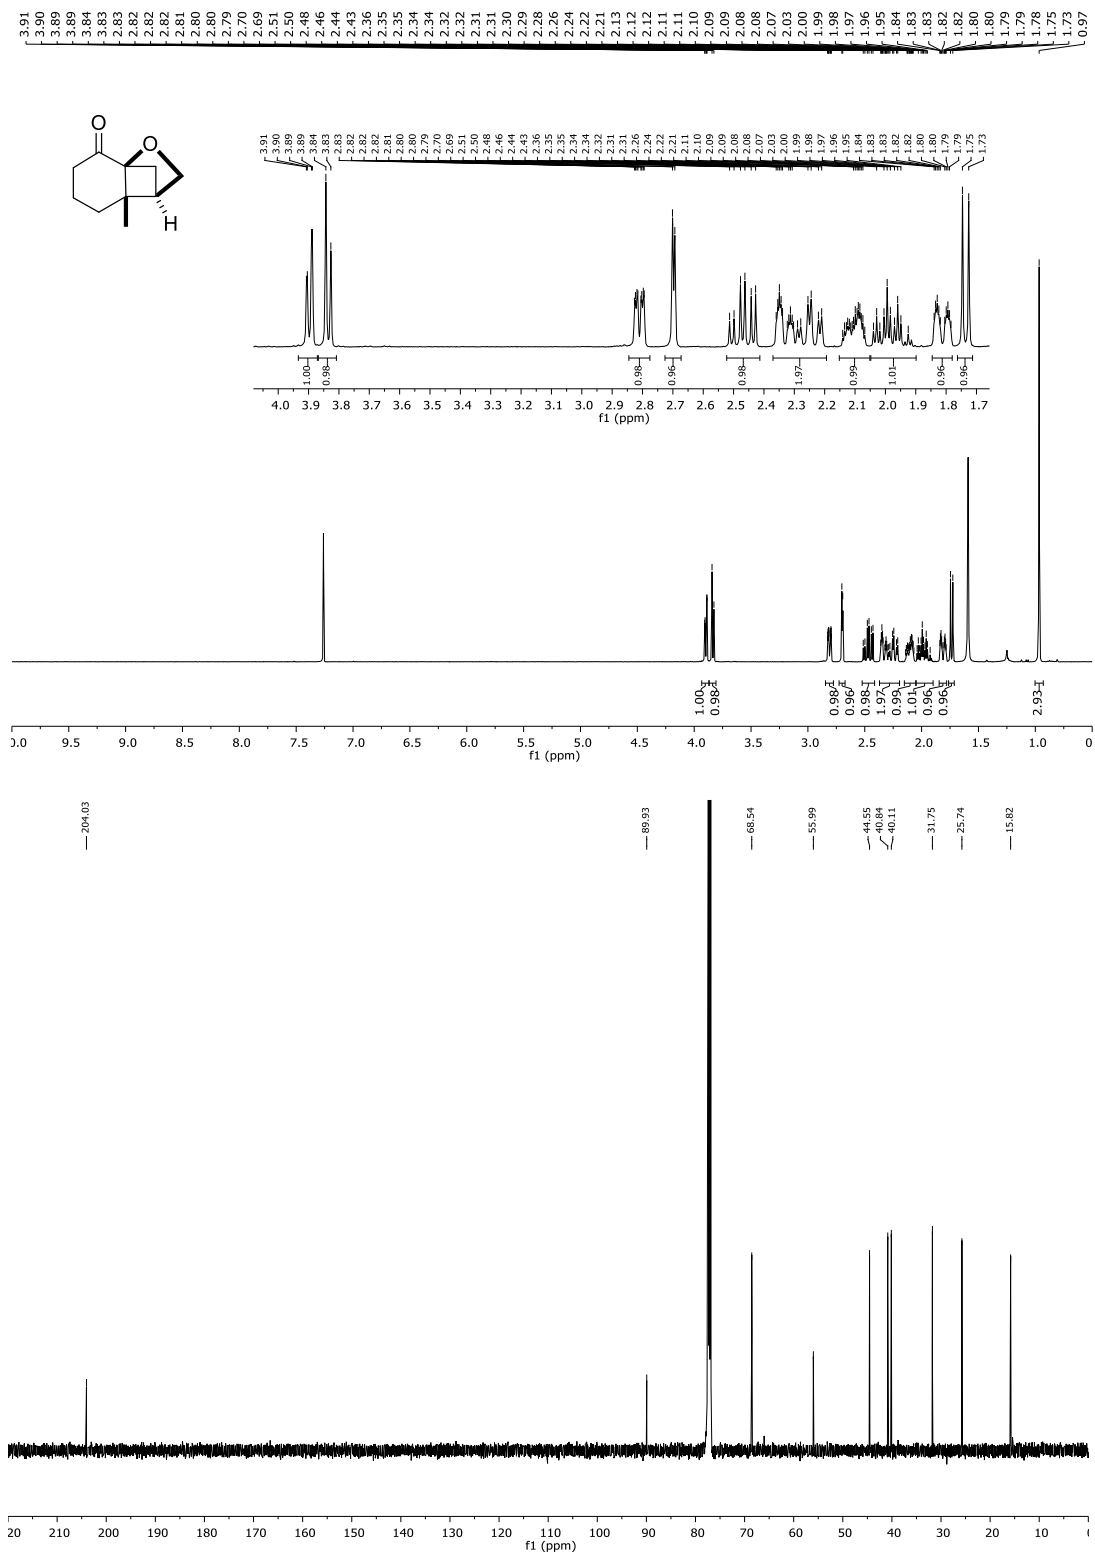

$^1\text{H}$  (500 MHz) and  $^{13}\text{C}\{^1\text{H}\}$  NMR (126 MHz) spectra of compound **8c** ( $\text{CDCl}_3$ )

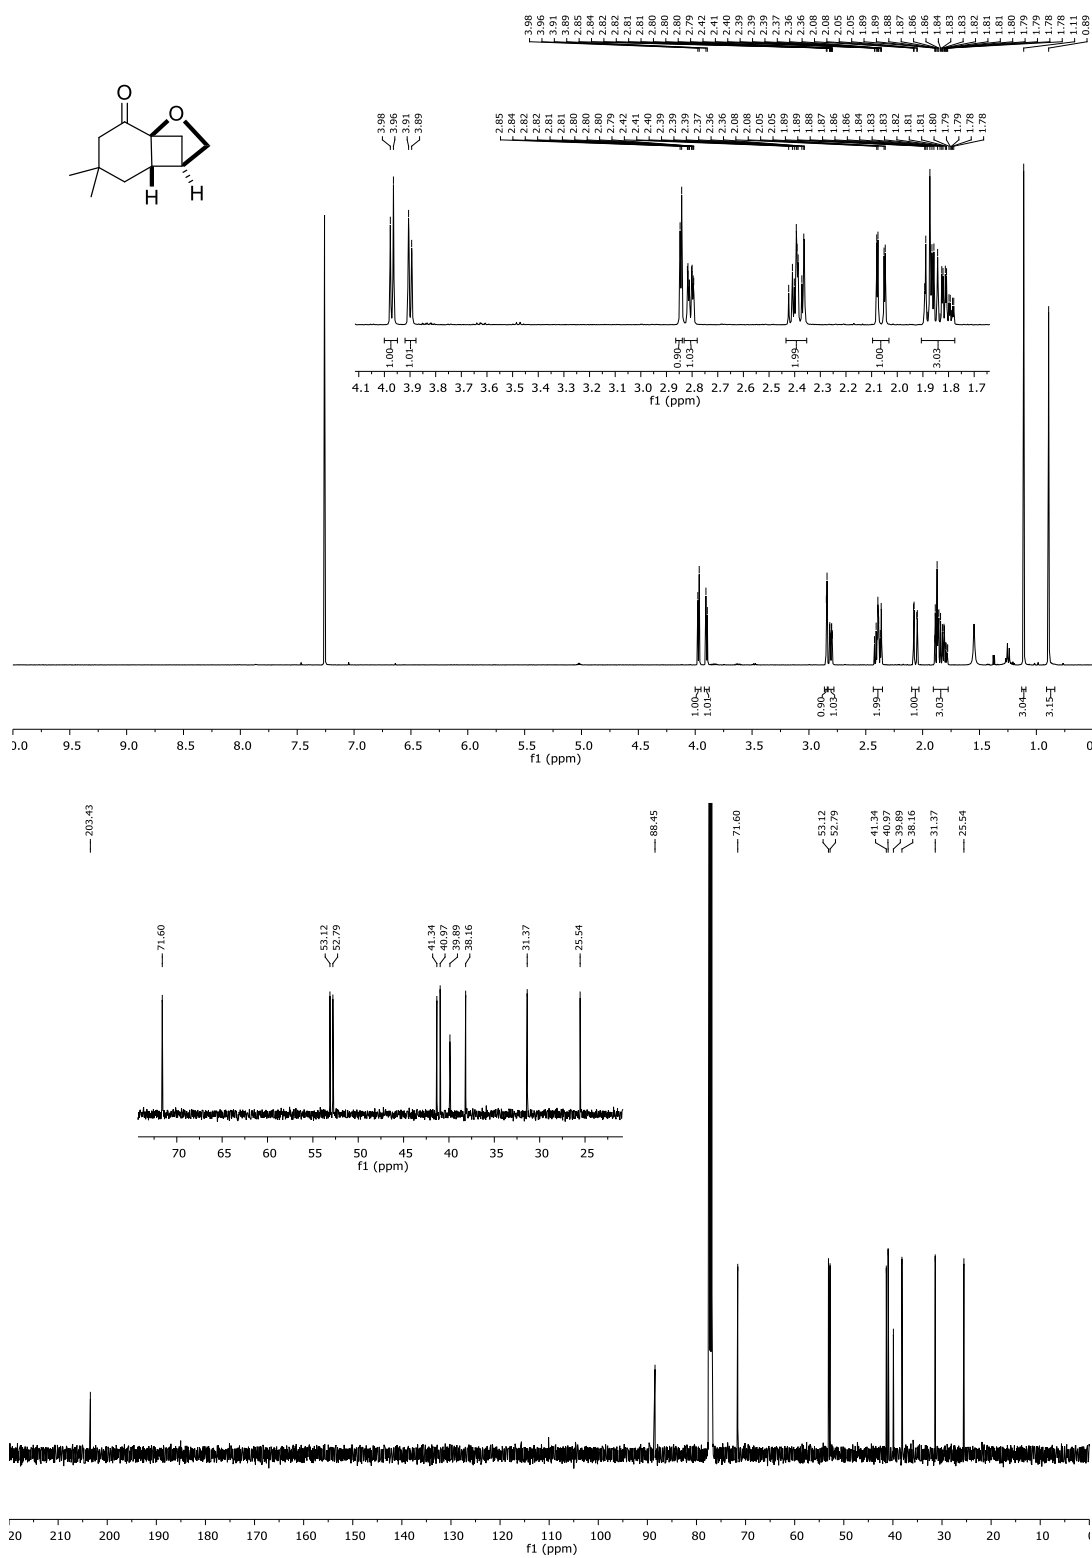



$^1\text{H}$  (500 MHz) and  $^{13}\text{C}\{^1\text{H}\}$  NMR (101 MHz) spectra of compound **9a** ( $\text{CDCl}_3$ )

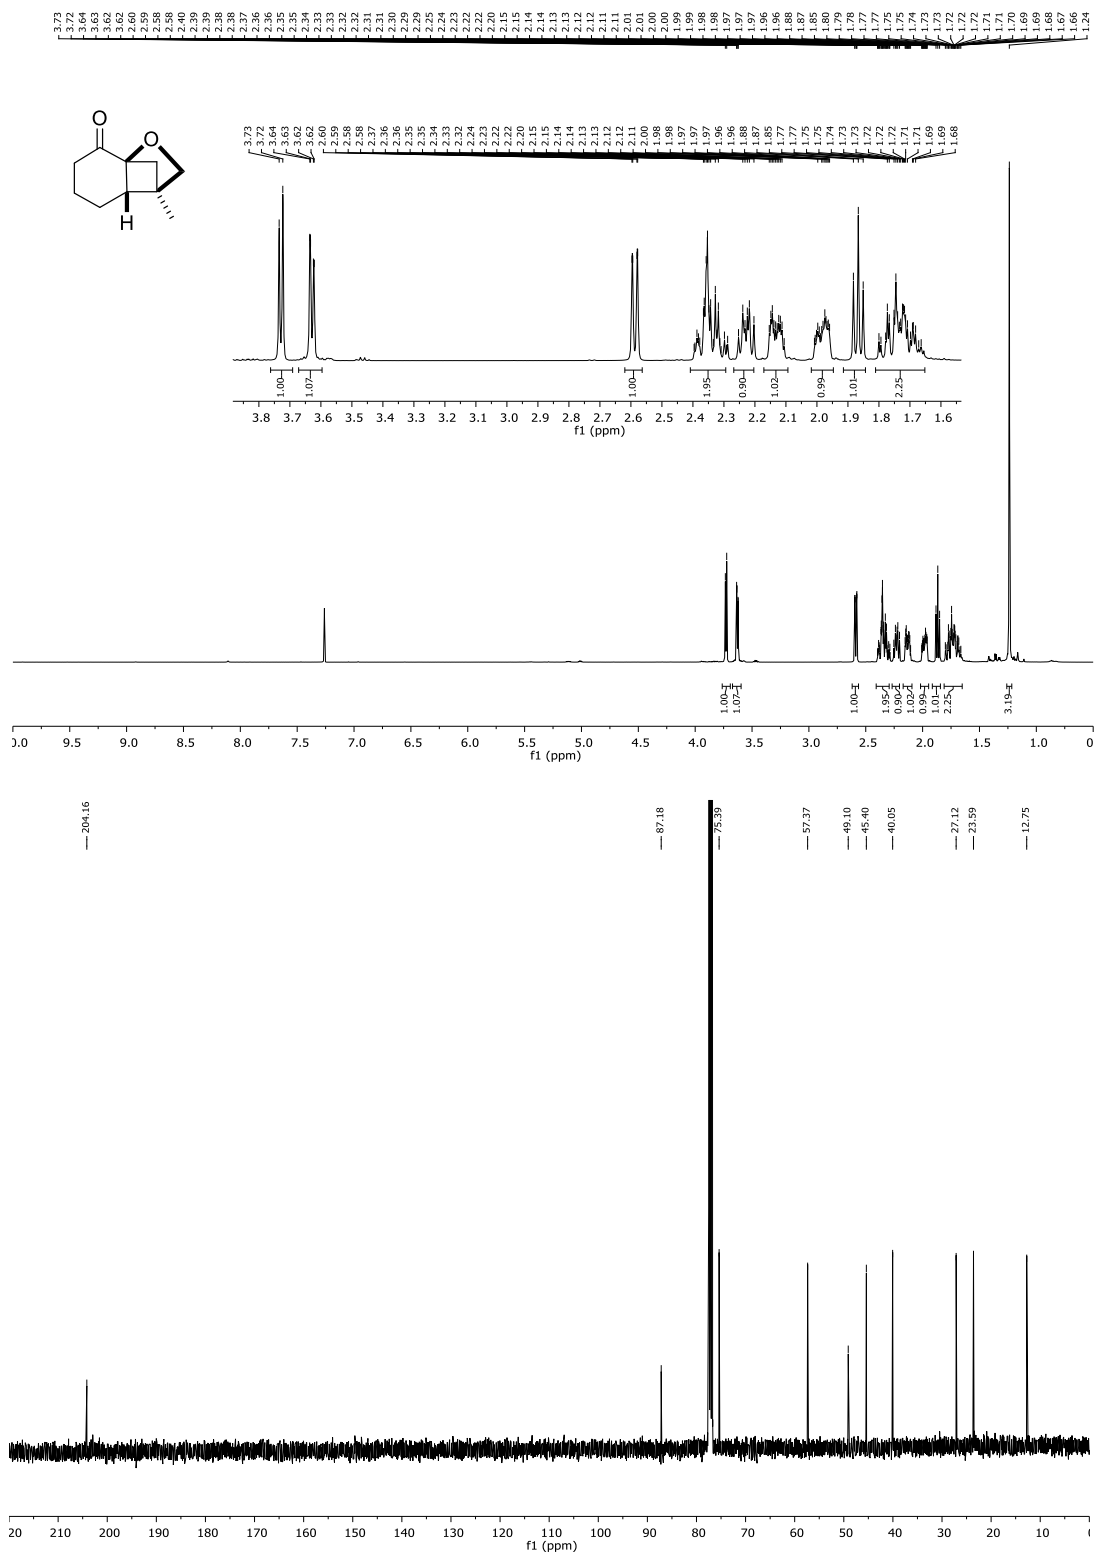



$^1\text{H}$  (500 MHz) and  $^{13}\text{C}\{^1\text{H}\}$  NMR (126 MHz) spectra of compound **9c** ( $\text{CDCl}_3$ )

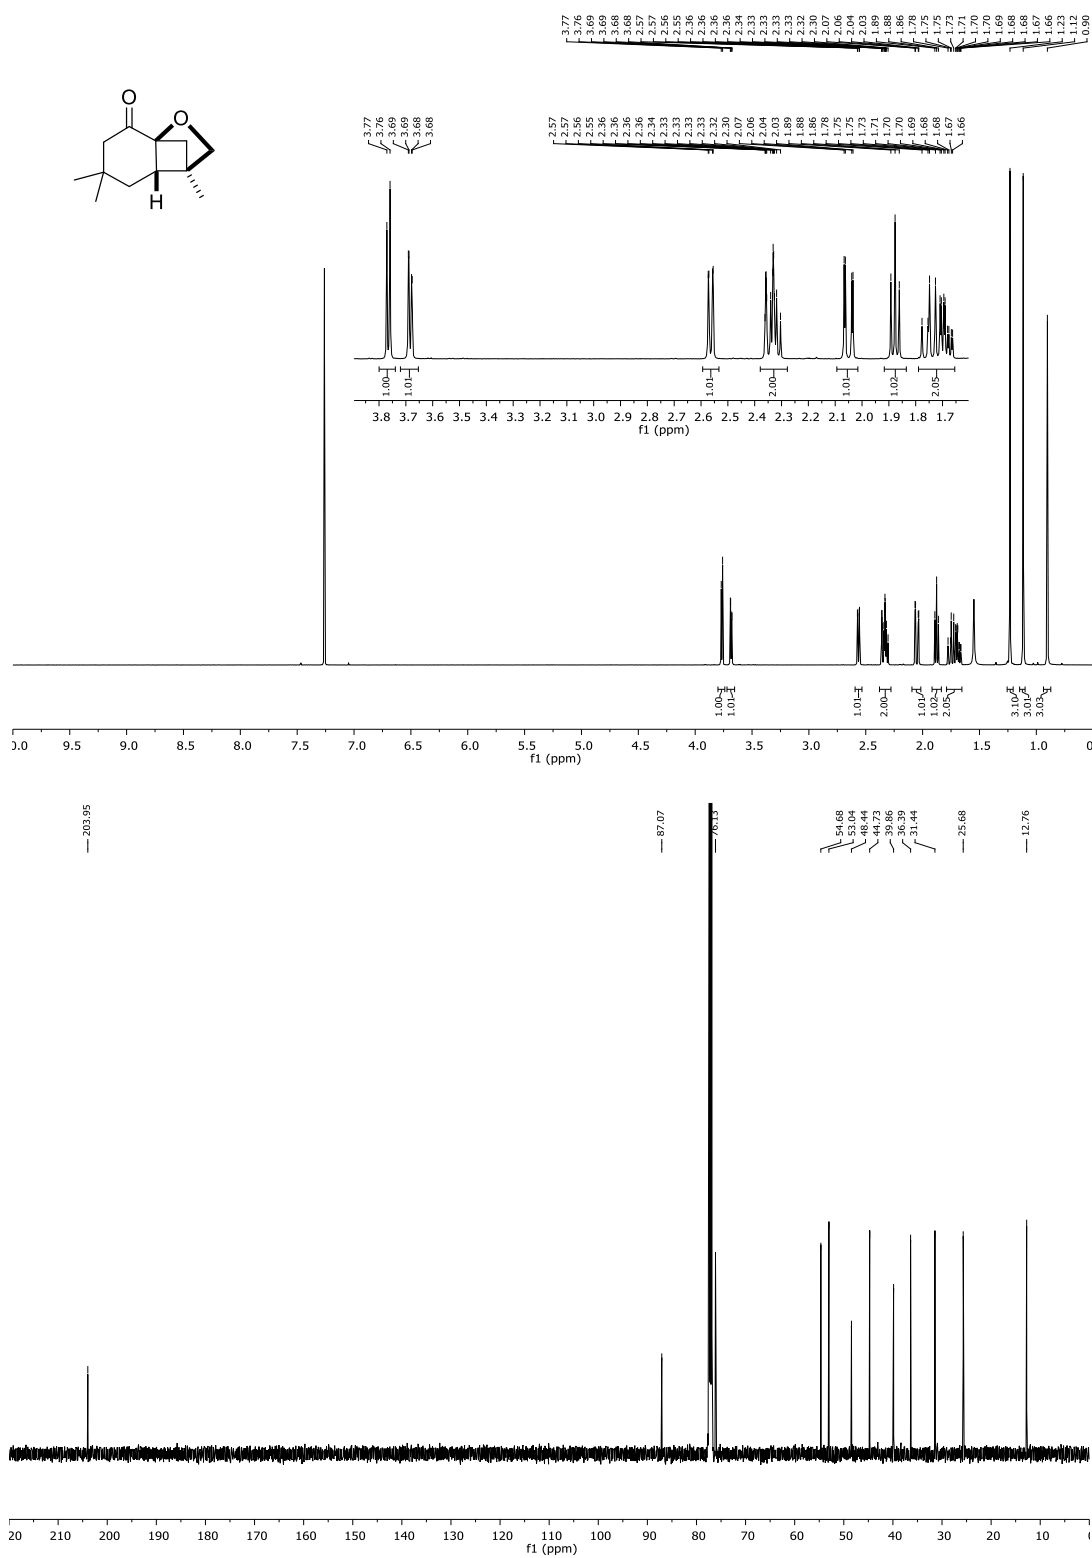



$^1\text{H}$  (500 MHz) and  $^{13}\text{C}\{^1\text{H}\}$  NMR (126 MHz) spectra of compound **9e** ( $\text{CDCl}_3$ )

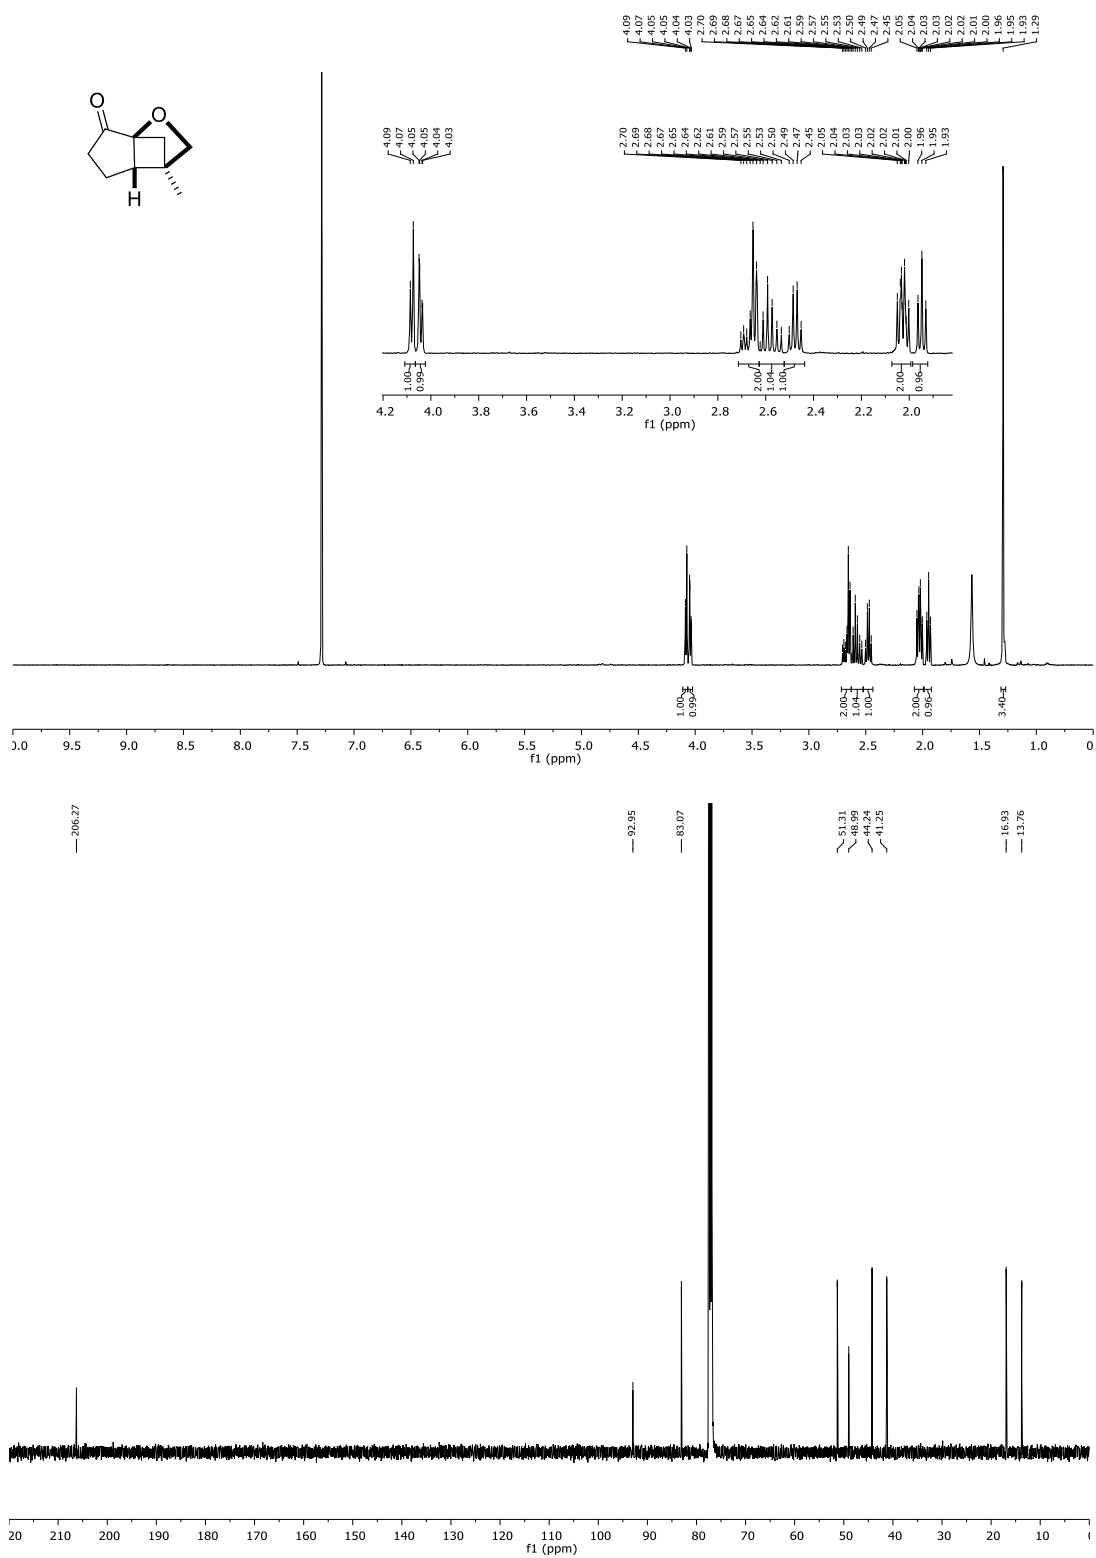

$^1\text{H}$  (400 MHz) and  $^{13}\text{C}$ { $^1\text{H}$ } NMR (101 MHz) spectra of compound *E*-10/*Z*-10 ( $\text{CDCl}_3$ )

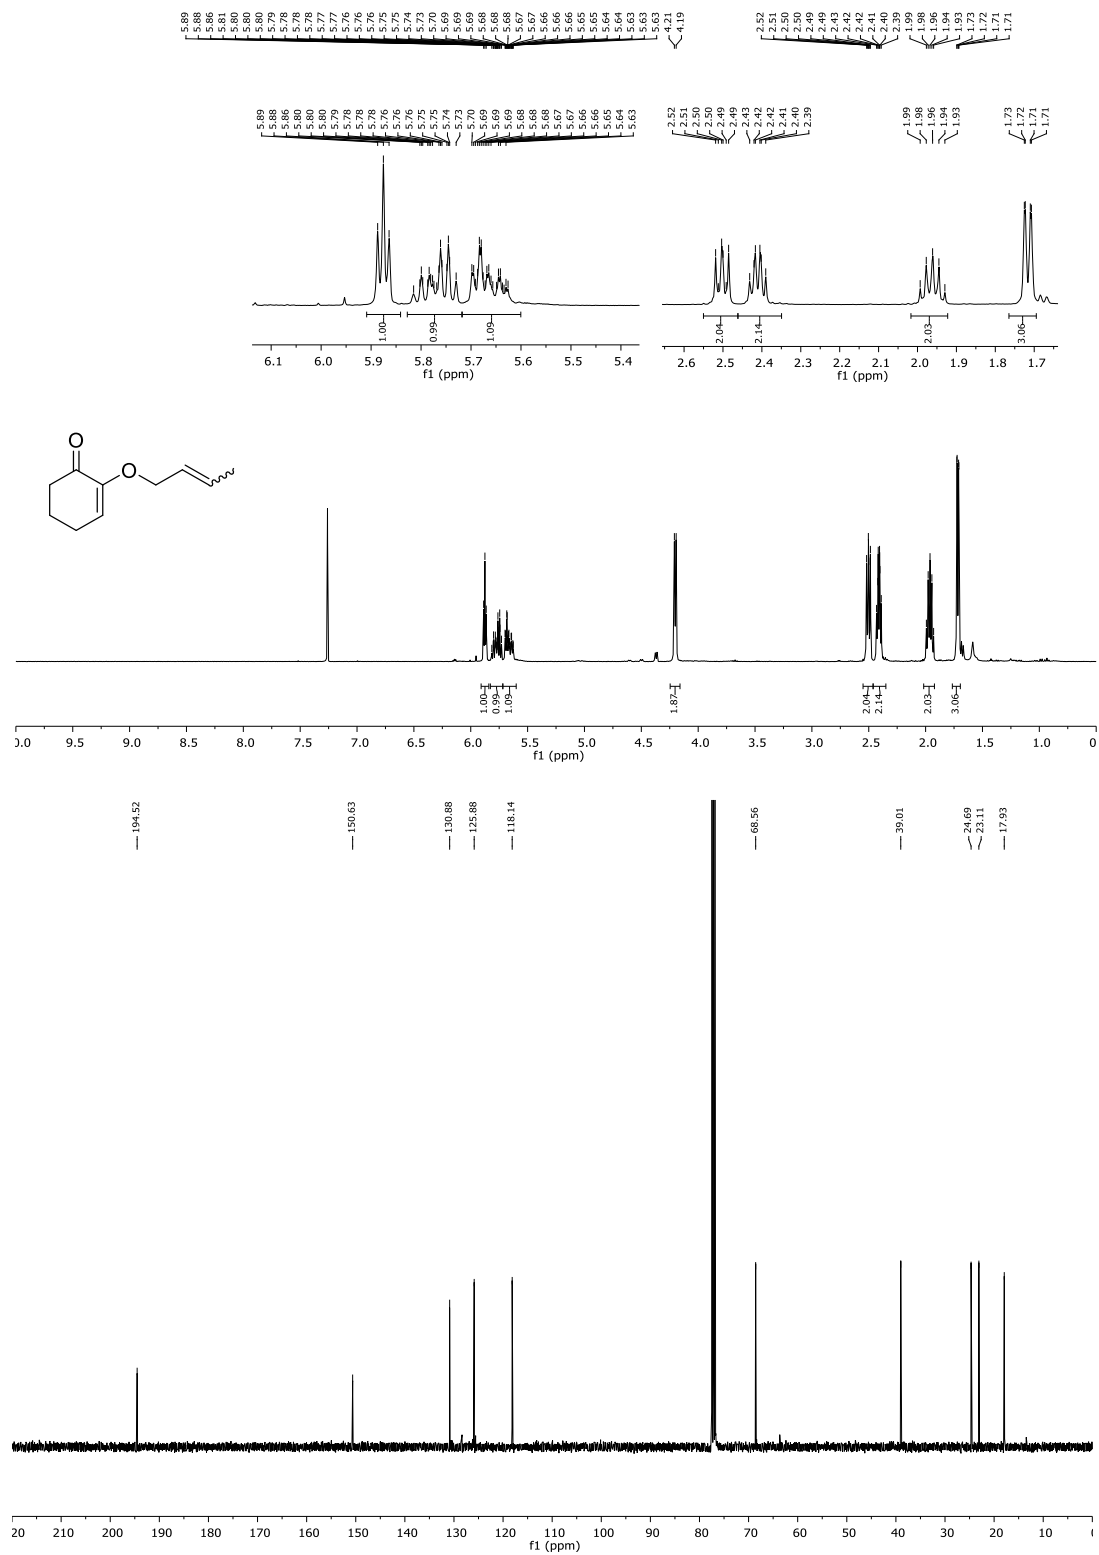

$^1\text{H}$  (500 MHz) and  $^{13}\text{C}\{^1\text{H}\}$  NMR (126 MHz) spectra of compound **11** ( $\text{CDCl}_3$ )

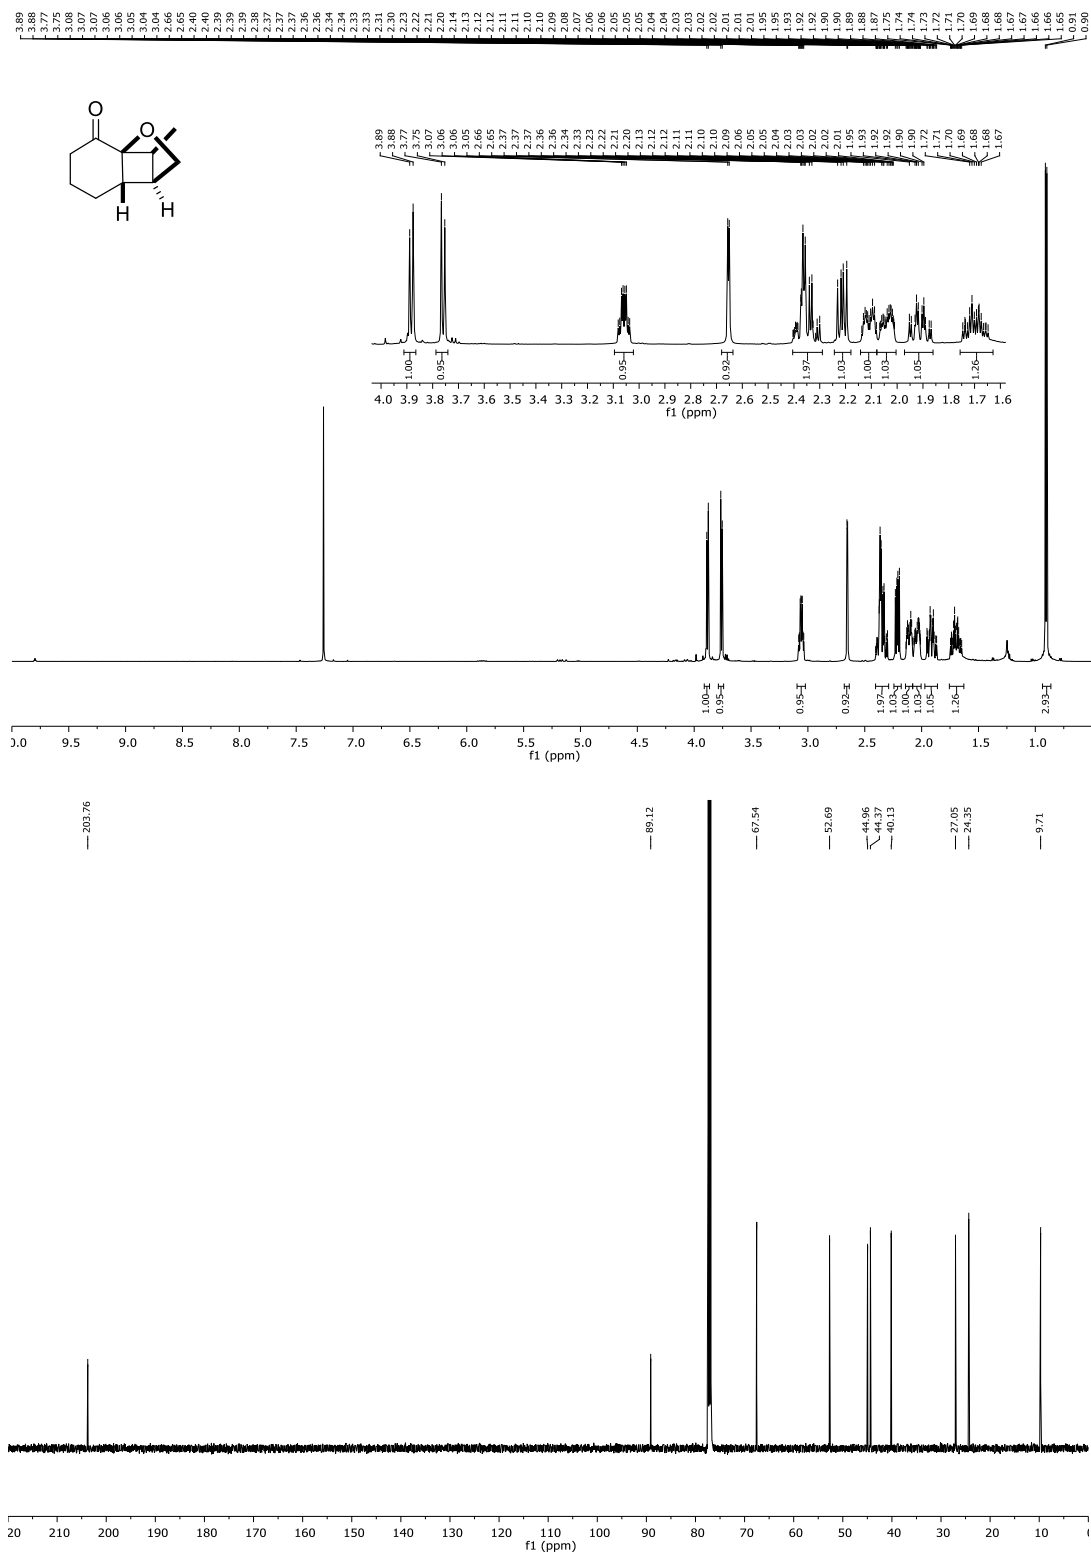





$^1\text{H}$  (500 MHz) and  $^{13}\text{C}\{^1\text{H}\}$  NMR (75 MHz) spectra of (*Z*)-1-Bromopent-2-ene ( $\text{CDCl}_3$ )

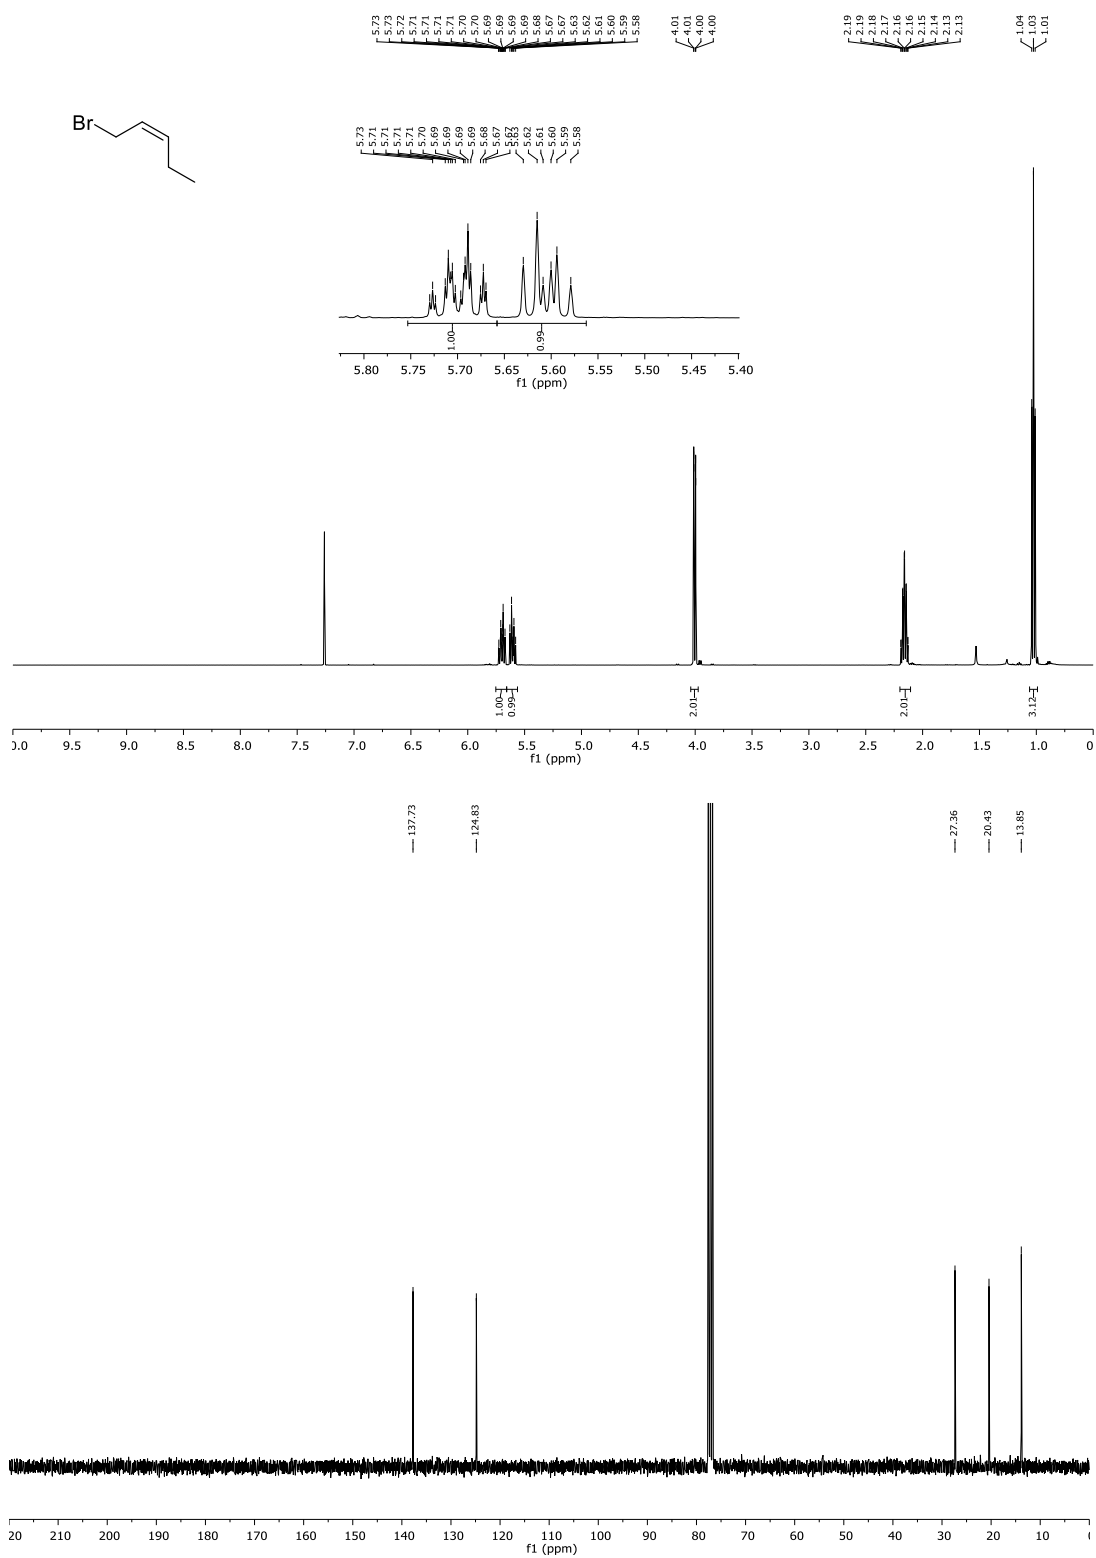

$^1\text{H}$  (500 MHz) and  $^{13}\text{C}\{^1\text{H}\}$  NMR (126 MHz) spectra of compound Z-12 ( $\text{CDCl}_3$ )

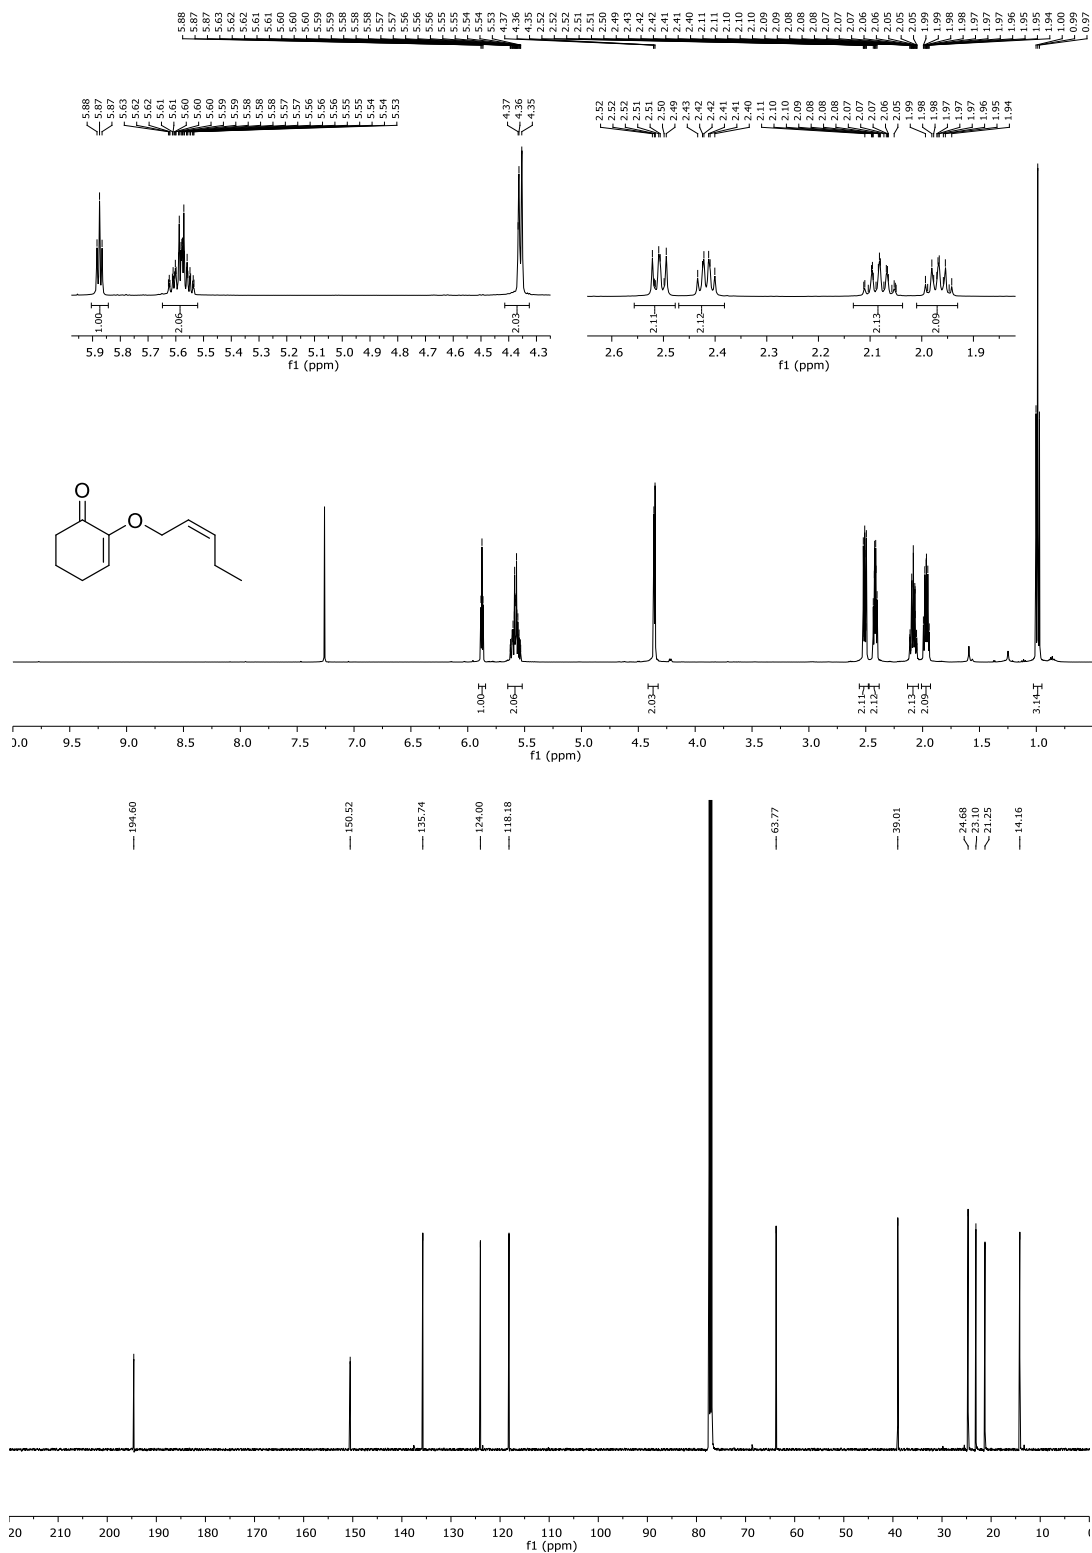



$^1\text{H}$  (500 MHz) and  $^{13}\text{C}\{^1\text{H}\}$  NMR (75 MHz) spectra of compound **16a** ( $\text{CDCl}_3$ )

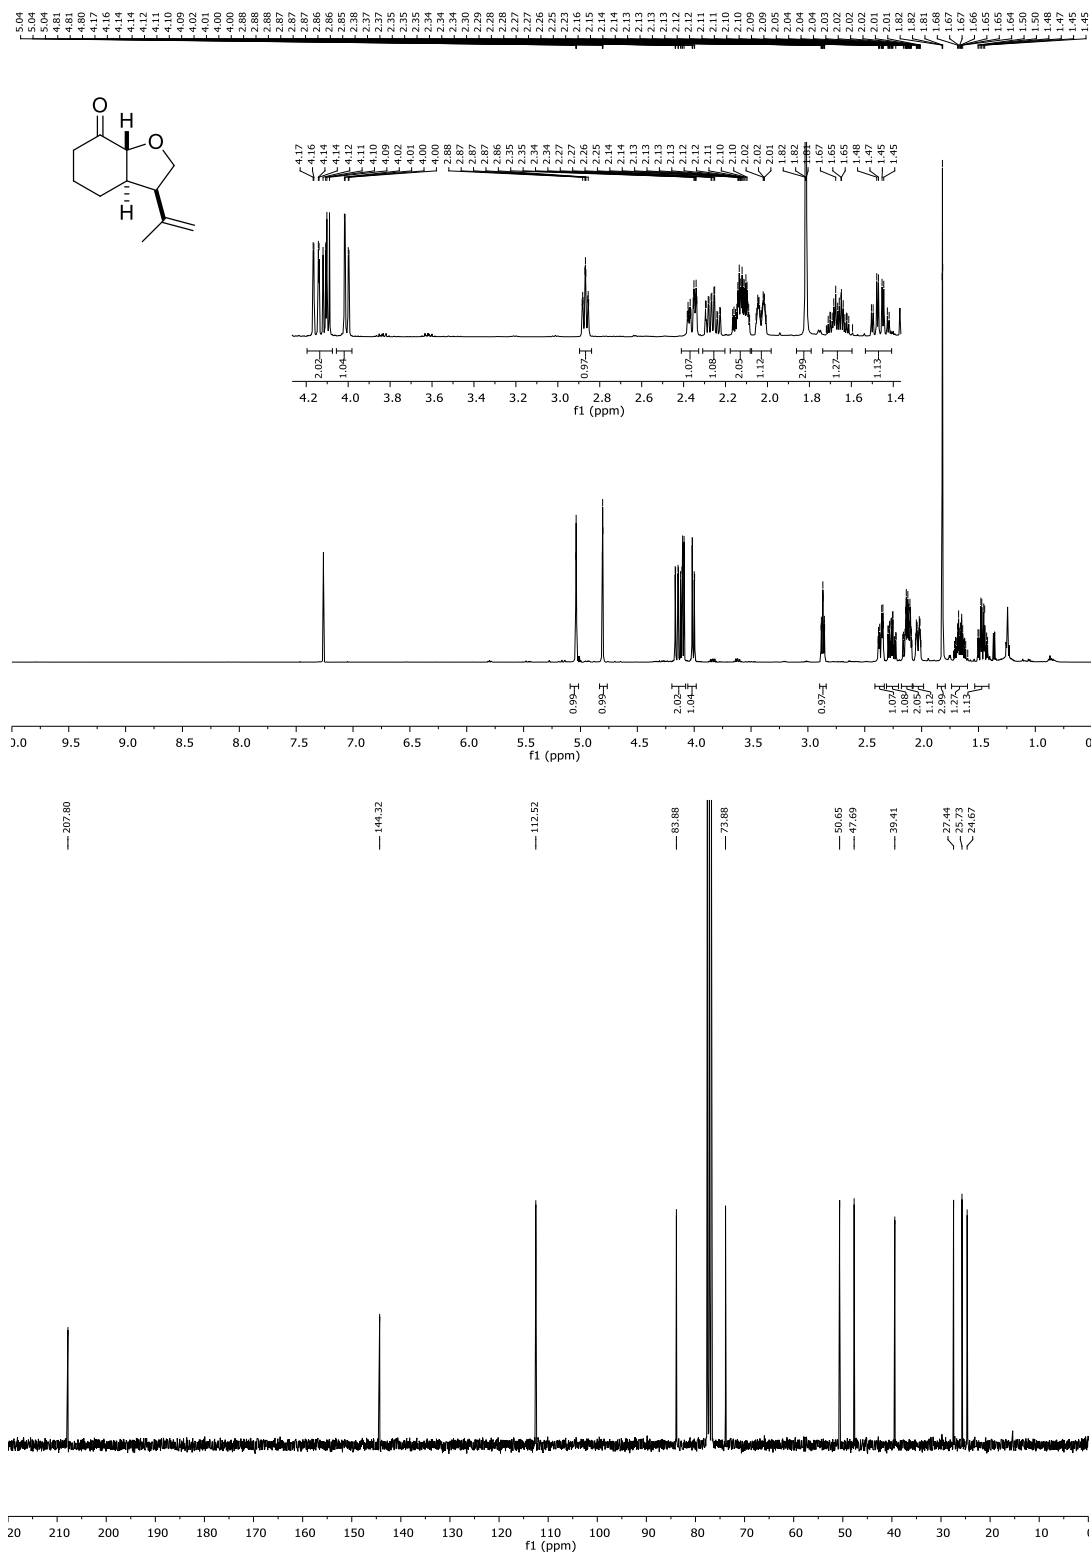

$^1\text{H}$  (400 MHz) and  $^{13}\text{C}\{^1\text{H}\}$  NMR (126 MHz) spectra of compound **16b** ( $\text{CDCl}_3$ )

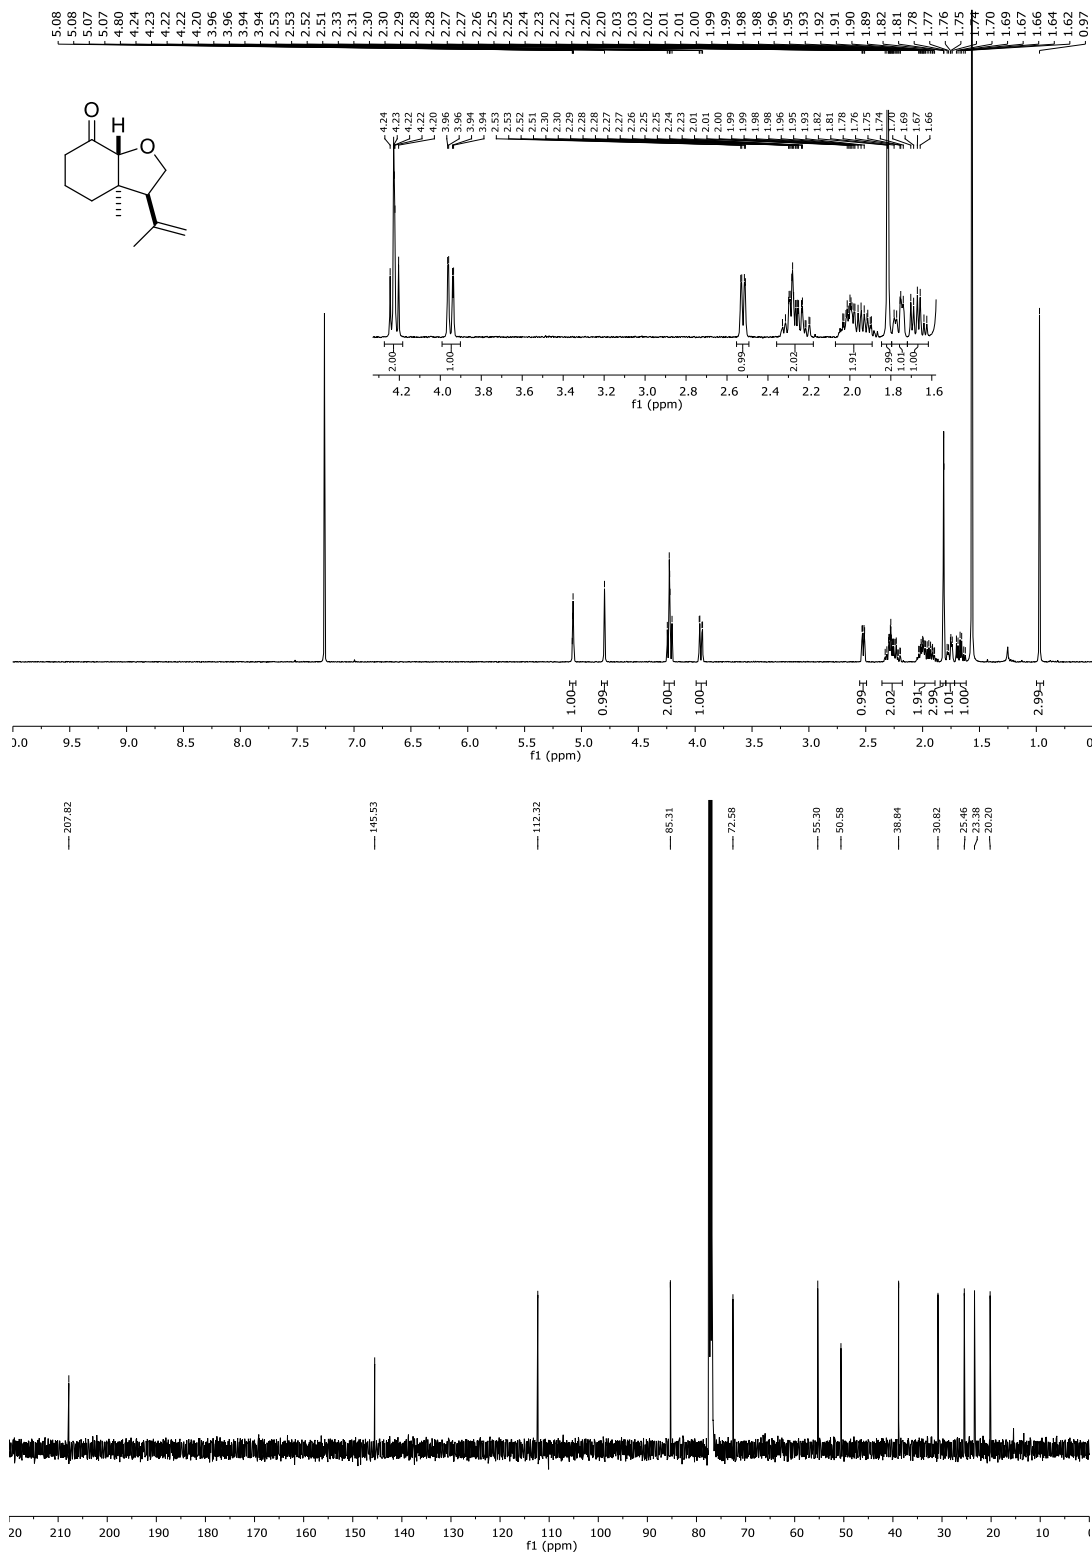

$^1\text{H}$  (500 MHz) and  $^{13}\text{C}\{^1\text{H}\}$  NMR (126 MHz) spectra of compound **16c** ( $\text{CDCl}_3$ )

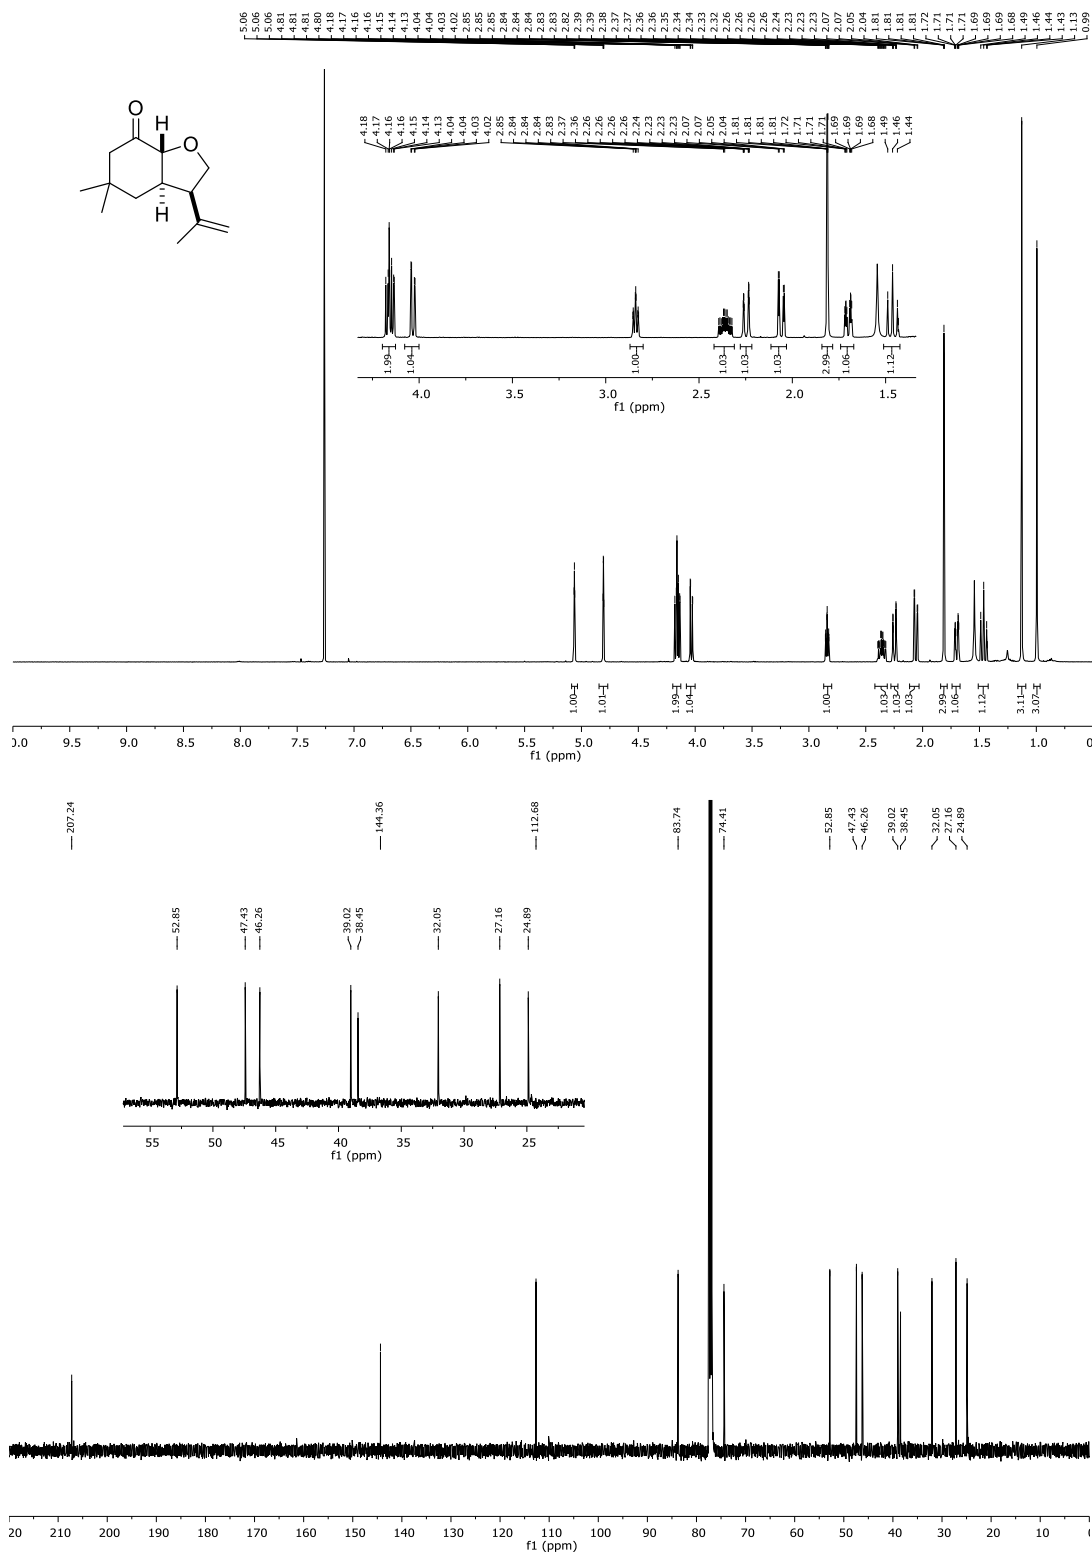

$^1\text{H}$  (400 MHz) and  $^{13}\text{C}\{^1\text{H}\}$  NMR (101 MHz) spectra of compound **17** ( $\text{CDCl}_3$ )

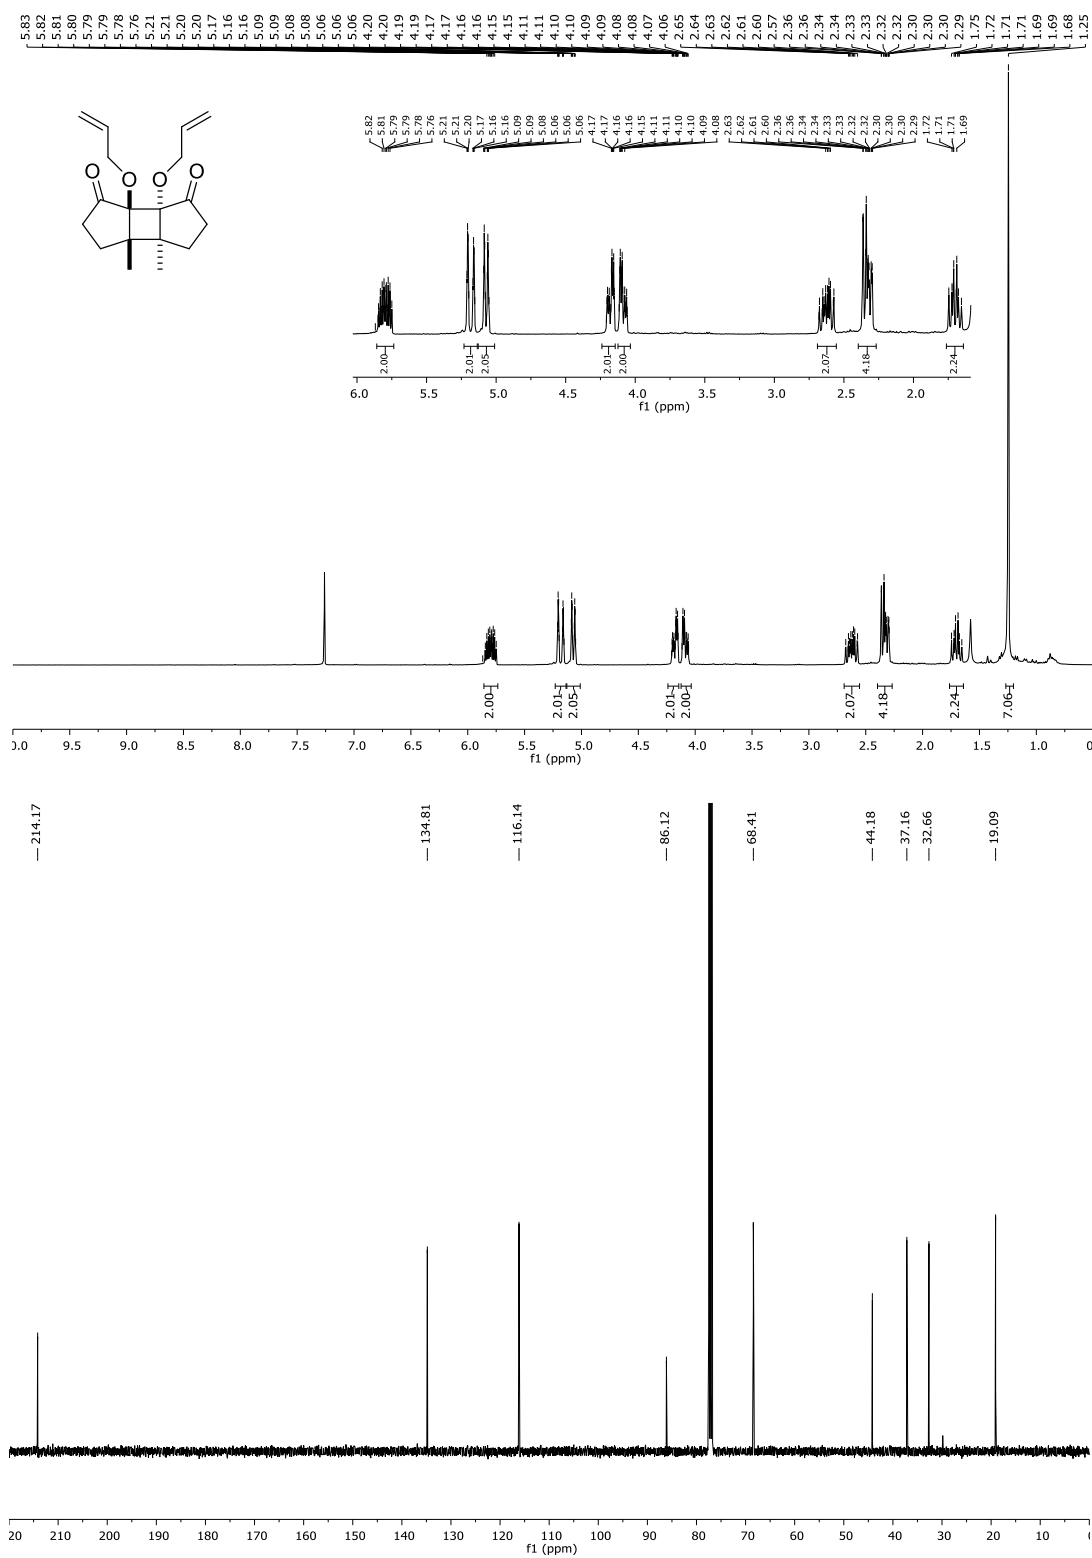

$^1\text{H}$  (400 MHz) and  $^{13}\text{C}\{^1\text{H}\}$  NMR (126 MHz) spectra of compound **18** ( $\text{CDCl}_3$ )

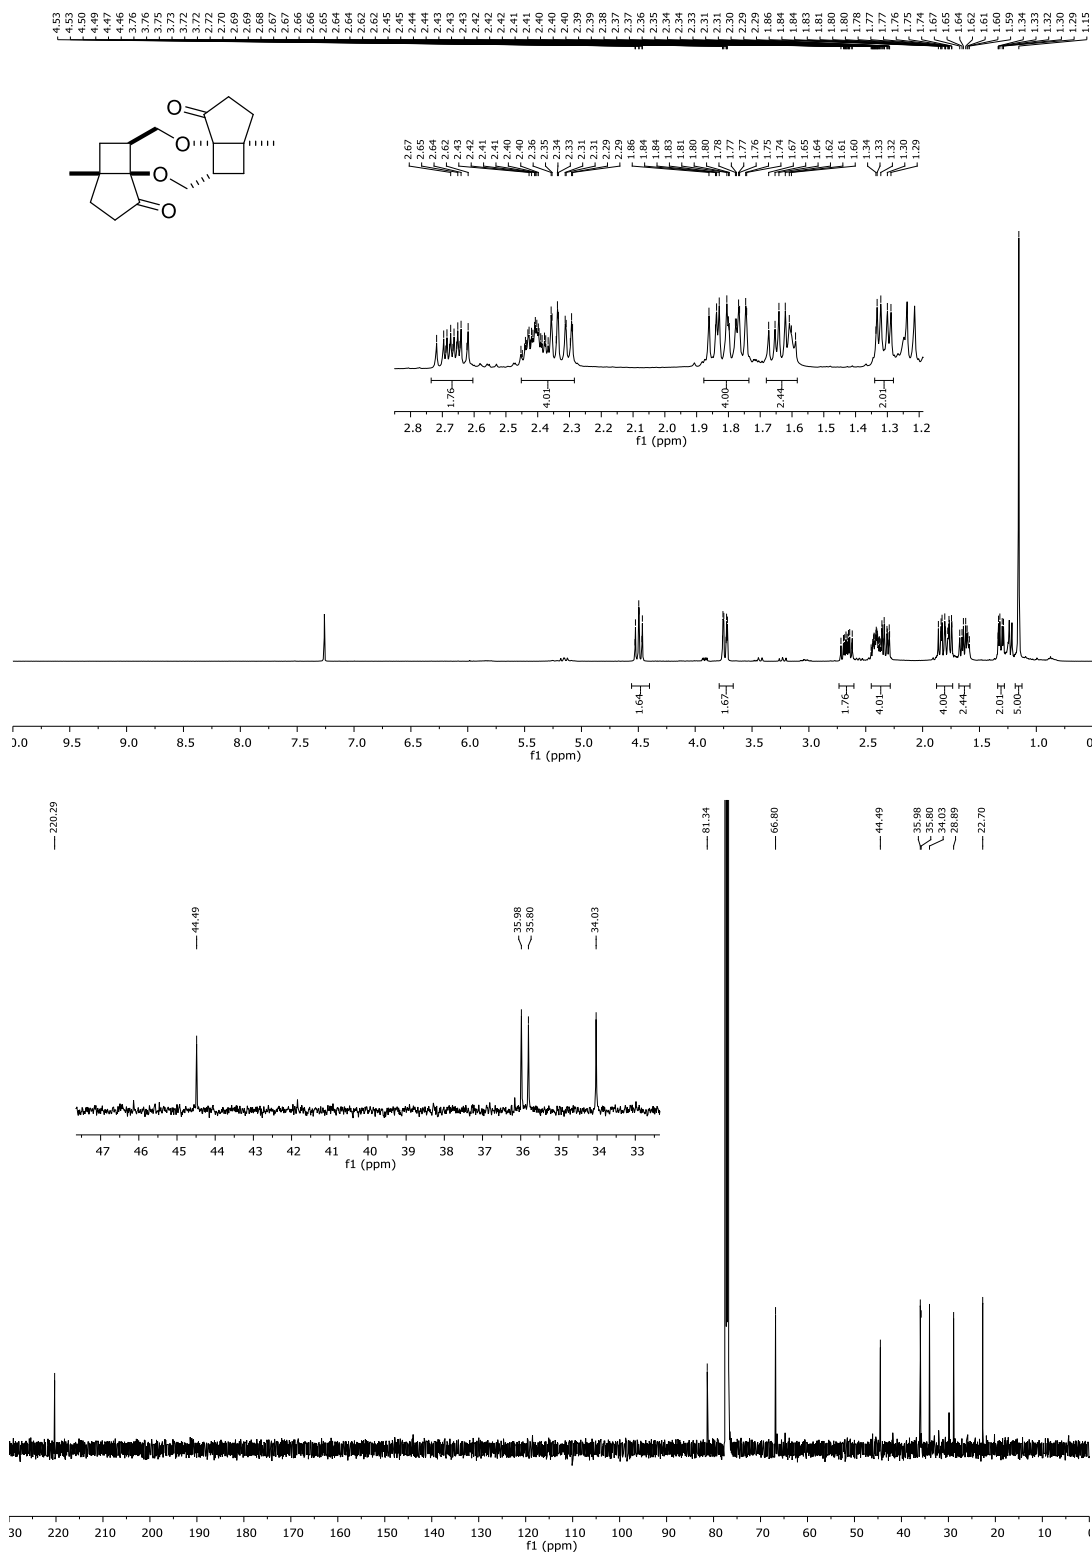



$^1\text{H}$  (500 MHz) and  $^{13}\text{C}\{^1\text{H}\}$  NMR (126 MHz) spectra of compound **19** ( $\text{CDCl}_3$ )

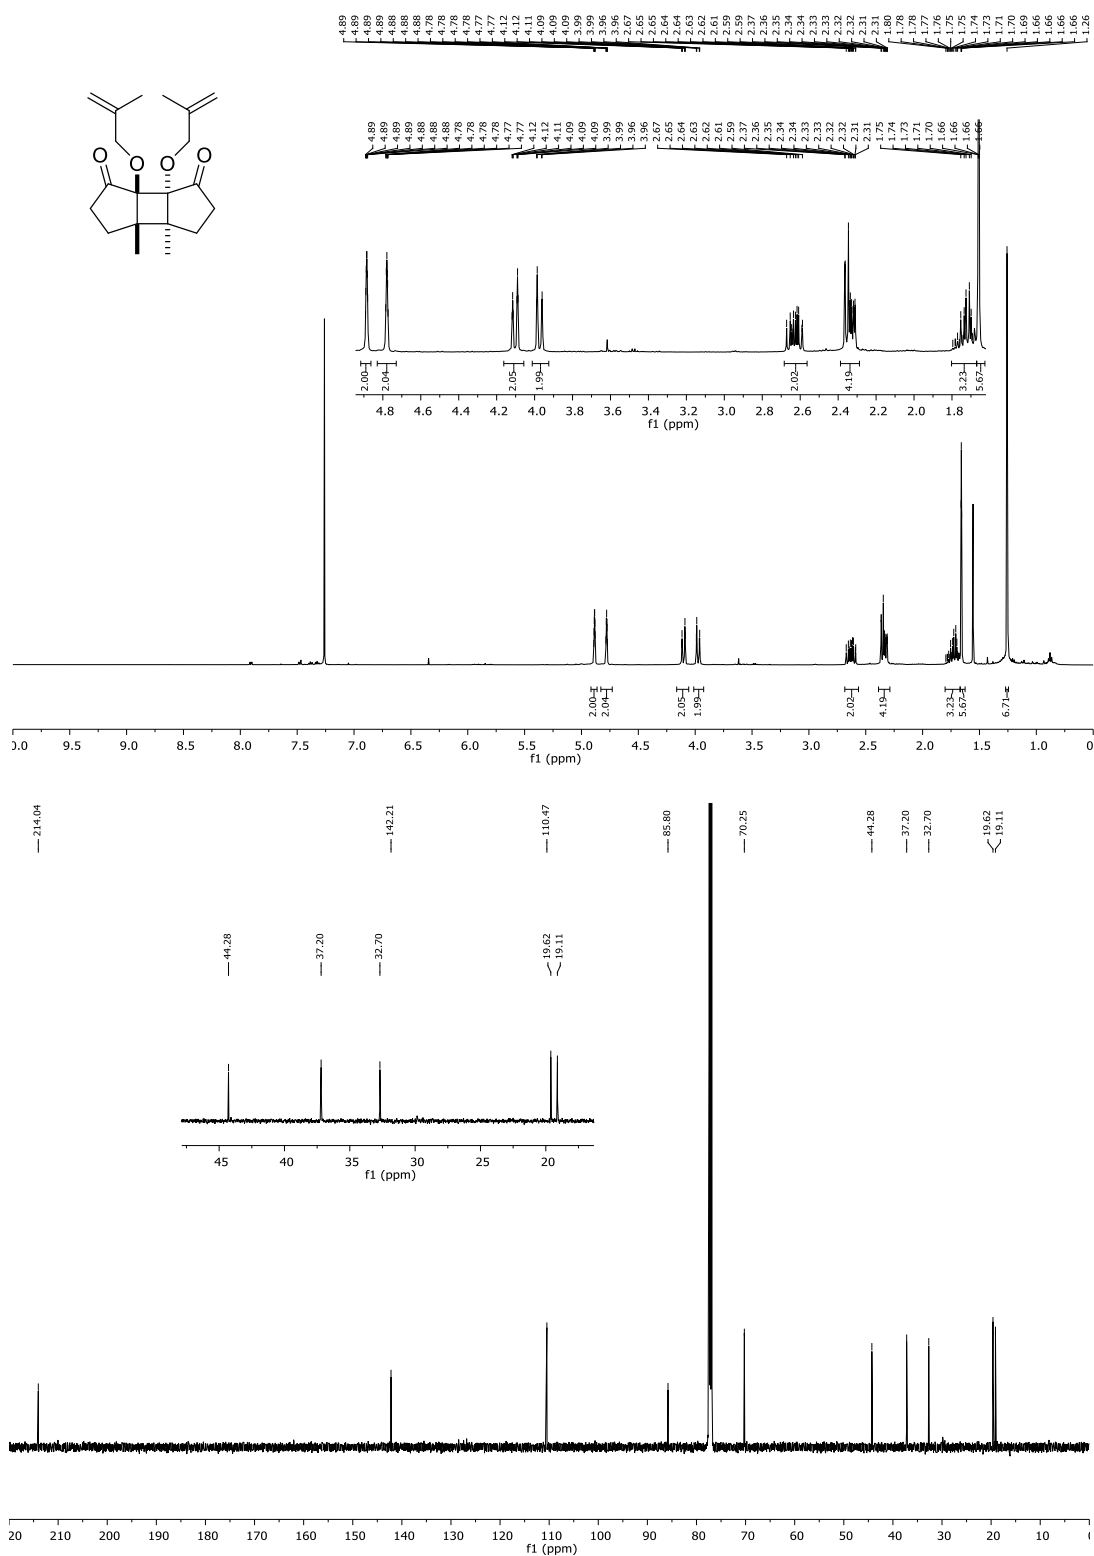



$^1\text{H}$  (500 MHz) and  $^{13}\text{C}\{^1\text{H}\}$  NMR (75 MHz) spectra of compound **21** ( $\text{CDCl}_3$ )

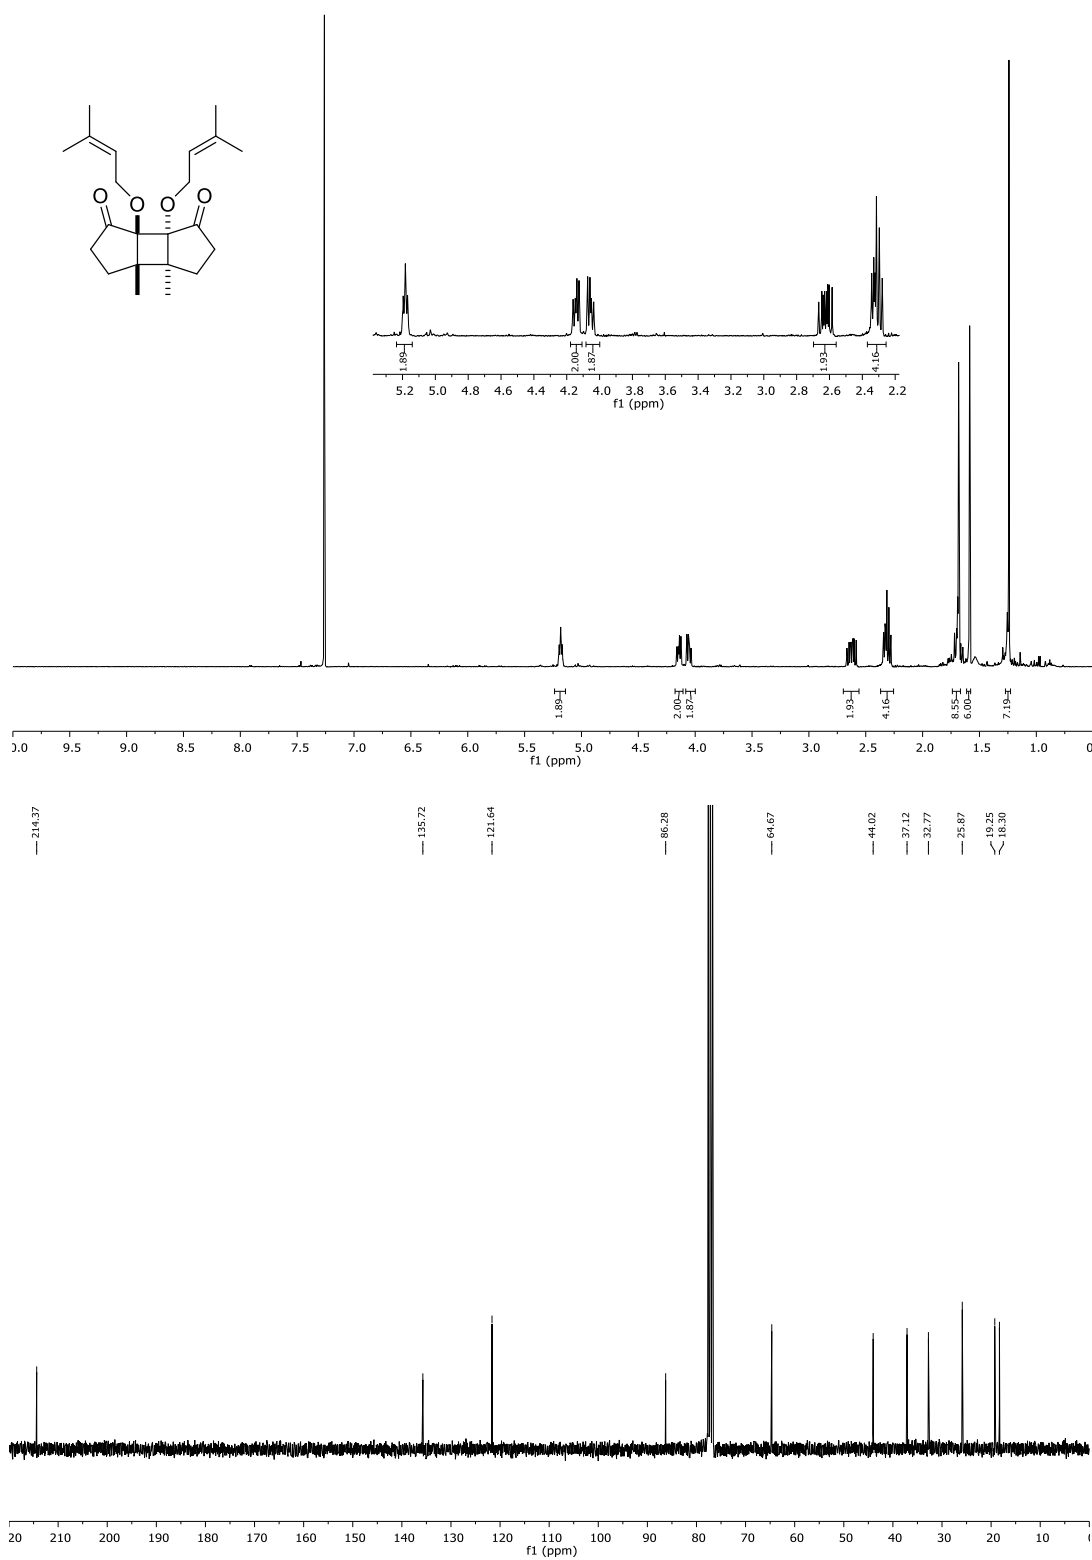

## 7. UV/vis Spectra of All Irradiation Precursors

UV/vis spectrum of compound **1a** (0.5 mM, CH<sub>2</sub>Cl<sub>2</sub>; 50mM, CH<sub>2</sub>Cl<sub>2</sub>)

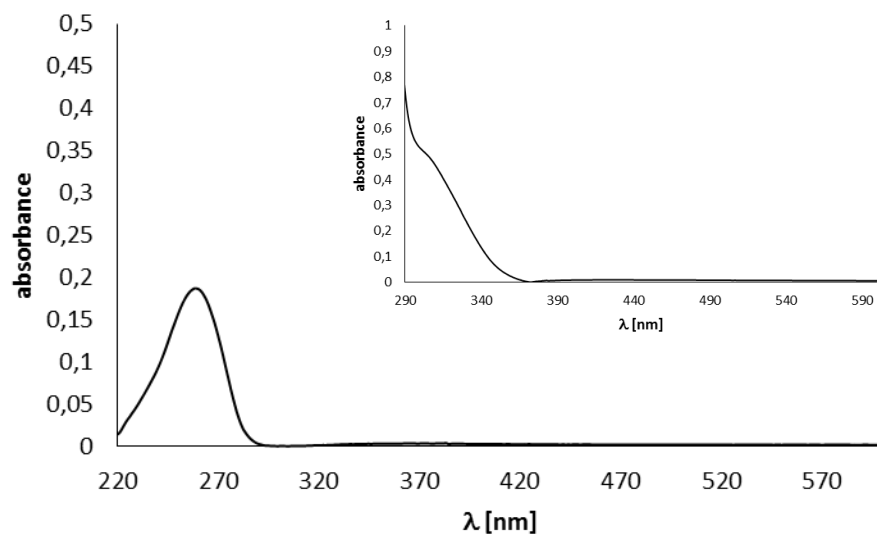

UV/vis spectrum of compound **1b** (0.5 mM, CH<sub>2</sub>Cl<sub>2</sub>; 20mM, CH<sub>2</sub>Cl<sub>2</sub>)

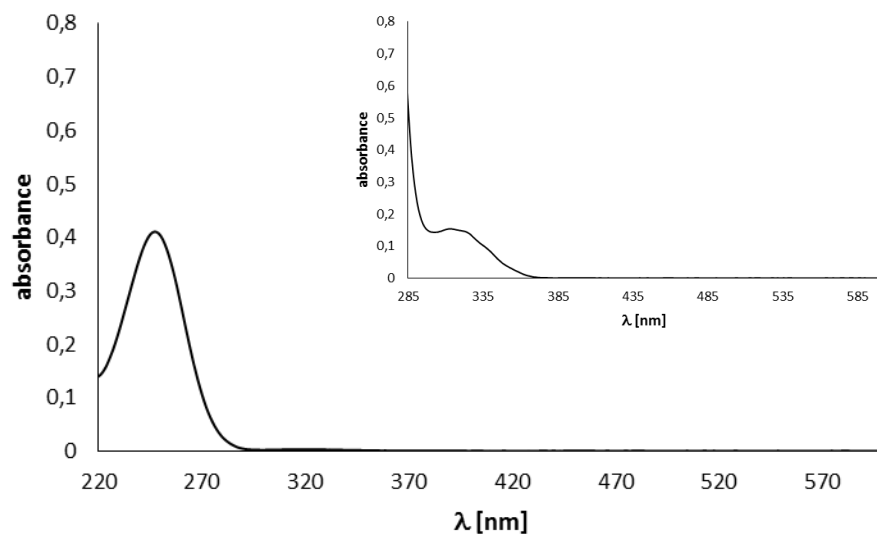

UV/vis spectrum of compound **1c** (0.5 mM, CH<sub>2</sub>Cl<sub>2</sub>; 20mM, CH<sub>2</sub>Cl<sub>2</sub>)

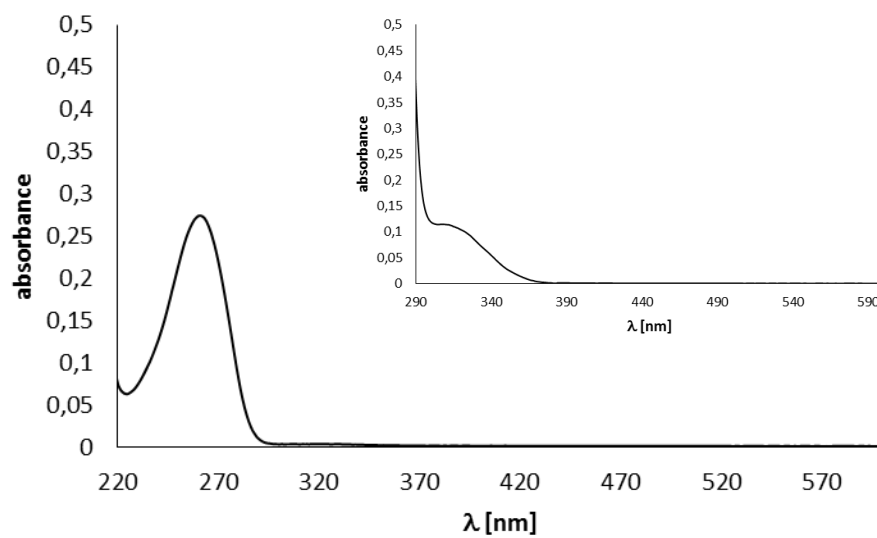

UV/vis spectrum of compound **1d** (0.5 mM, CH<sub>2</sub>Cl<sub>2</sub>; 20mM, CH<sub>2</sub>Cl<sub>2</sub>)

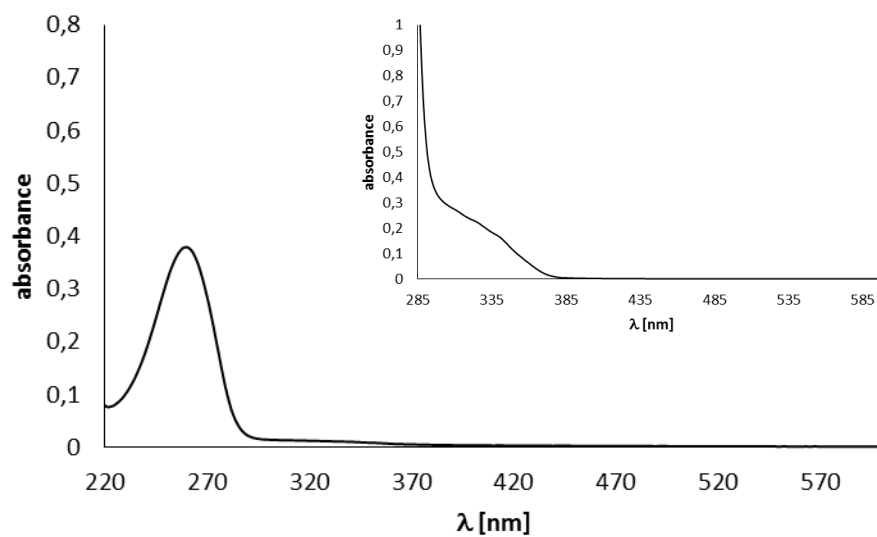

UV/vis spectrum of compound **1e** (0.5 mM, CH<sub>2</sub>Cl<sub>2</sub>; 20mM, CH<sub>2</sub>Cl<sub>2</sub>)

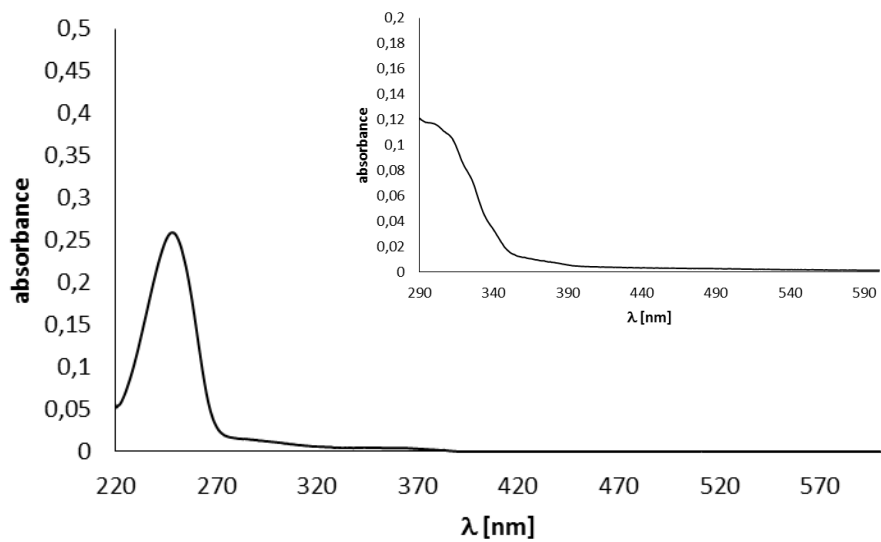

UV/vis spectrum of compound **1f** (0.5 mM, CH<sub>2</sub>Cl<sub>2</sub>; 20mM, CH<sub>2</sub>Cl<sub>2</sub>)

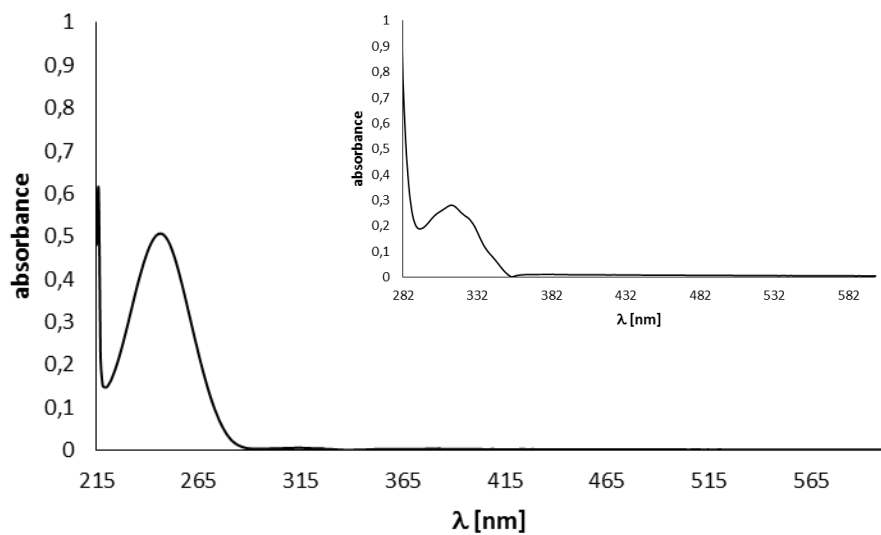

UV/vis spectrum of compound **2a** (left) and **2b** (right) (0.5 mM, CH<sub>2</sub>Cl<sub>2</sub>)

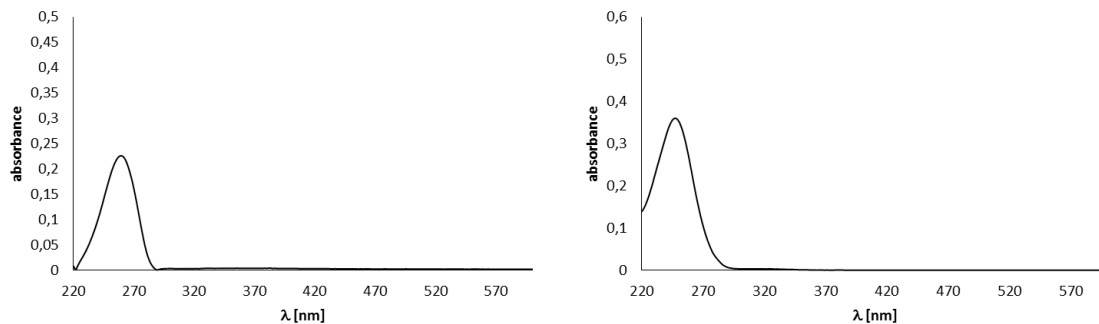

UV/vis spectrum of compound **2c** (left) and **2d** (right) (0.5 mM, CH<sub>2</sub>Cl<sub>2</sub>)

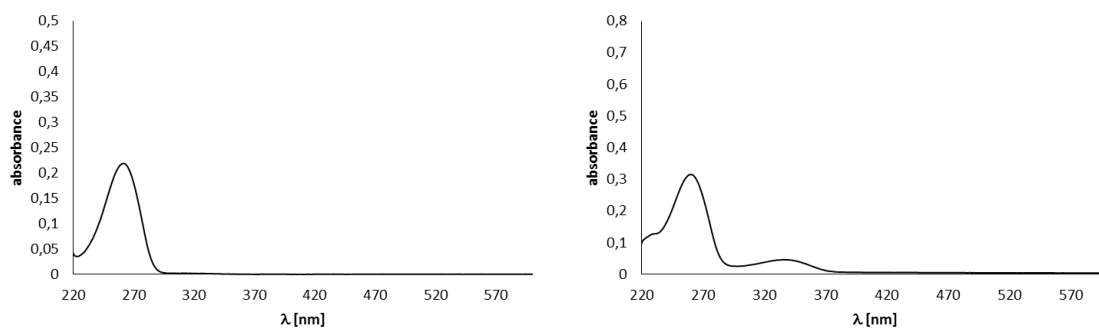

UV/vis spectrum of compound **2e** (left) and **2f** (right) (0.5 mM, CH<sub>2</sub>Cl<sub>2</sub>)

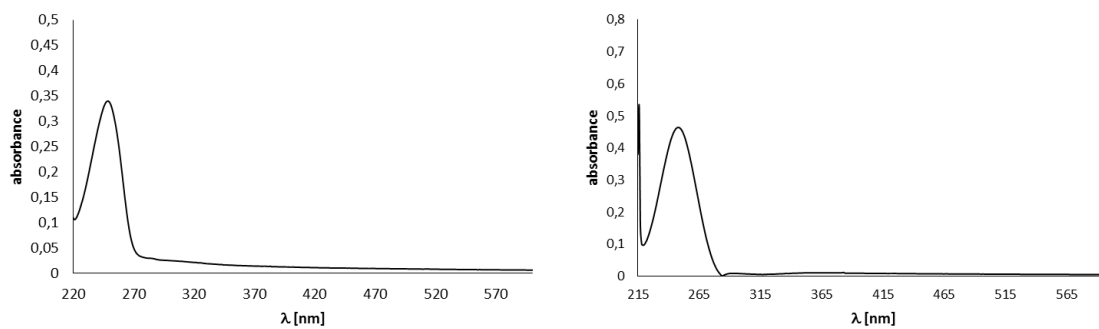

UV/vis spectrum of compound **3a** (left) and **3b** (right) (0.5 mM, CH<sub>2</sub>Cl<sub>2</sub>)

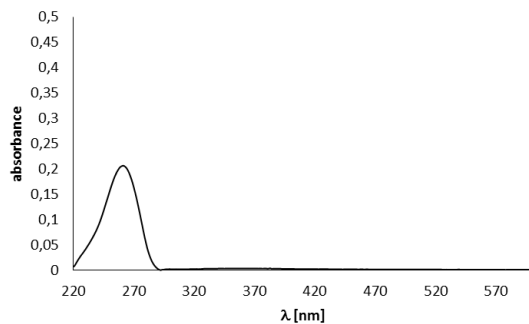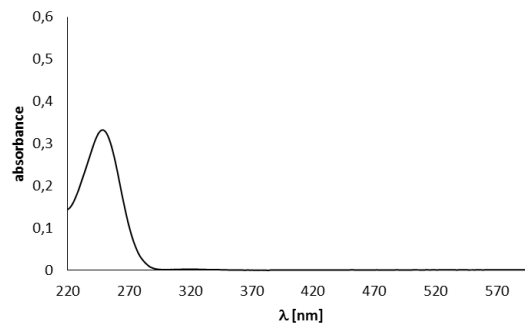

UV/vis spectrum of compound **3c** (left) and **3e** (right) (0.5 mM, CH<sub>2</sub>Cl<sub>2</sub>)

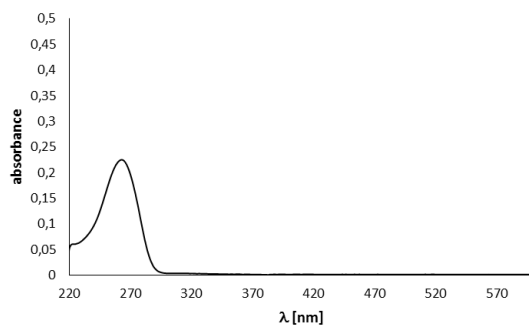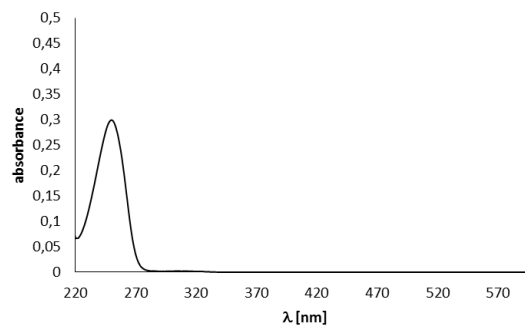

UV/vis spectrum of compound **3f** (left) and *E*-**10**/*Z*-**10** (right) (0.5 mM, CH<sub>2</sub>Cl<sub>2</sub>)

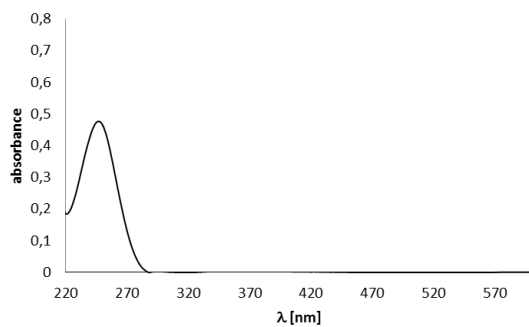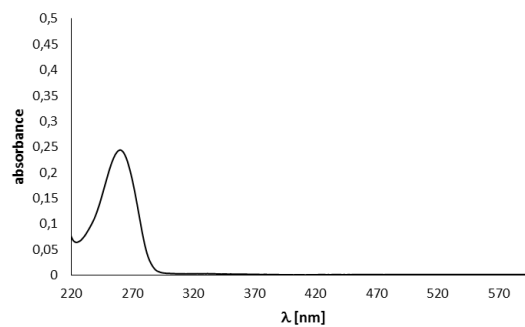



UV/vis spectrum of compound *E*-12 (left) and *Z*-12 (right) (0.5 mM, CH<sub>2</sub>Cl<sub>2</sub>)

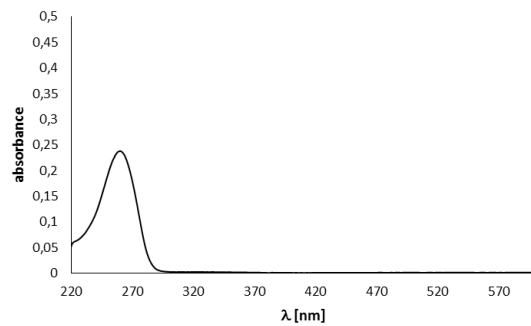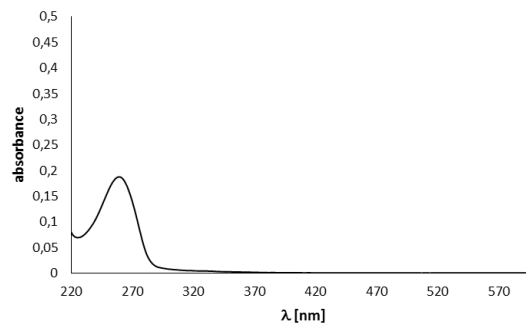

## 8. X-ray Crystallographic Details

Data were collected on Bruker D8 Venture single crystal x-ray diffractometer equipped with a CPAD detector (Bruker Photon II) (compounds **18**, **S1**) or a CMOS detector (Bruker Photon-100) (compound **21**), an IMS micro source (compounds **18**, **S1**) or a TXS rotating anode (compound **21**) with MoK $\alpha$  radiation ( $\lambda = 0.71073 \text{ \AA}$ ) and a Helios optic using the APEX3 software package.<sup>6</sup> Measurements were performed on single crystals coated with perfluorinated ether. The crystals were fixed on top of a kapton micro sampler and frozen under a stream of cold nitrogen. A matrix scan was used to determine the initial lattice parameters. Reflections were corrected for Lorentz and polarisation effects, scan speed, and background using SAINT.<sup>7</sup> Absorption correction, including odd and even ordered spherical harmonics was performed using SADABS.<sup>7</sup> Space group assignments were based upon systematic absences, E statistics, and successful refinement of the structures. The structures were solved using SHELXT with the aid of successive difference Fourier maps, and were refined against all data using SHELXL in conjunction with SHELXLE.<sup>8,9,10</sup> Hydrogen atoms were calculated in ideal positions as follows: Methyl hydrogen atoms were refined as part of rigid rotating groups, with a C–H distance of 0.98  $\text{\AA}$  and  $U_{\text{iso(H)}} = 1.5 \cdot U_{\text{eq(C)}}$ . Other H atoms were placed in calculated positions and refined using a riding model, with methylene and aromatic C–H distances of 0.99  $\text{\AA}$  and 0.95  $\text{\AA}$ , respectively, other C–H distances of 1.00  $\text{\AA}$ , all with  $U_{\text{iso(H)}} = 1.2 \cdot U_{\text{eq(C)}}$ . Non-hydrogen atoms were refined with anisotropic displacement parameters. Full-matrix least-squares refinements were carried out by minimizing  $\sum w(F_o^2 - F_c^2)^2$  with the SHELXL weighting scheme.<sup>8</sup> Neutral atom scattering factors for all atoms and anomalous dispersion corrections for the non-hydrogen atoms were taken from *International Tables for Crystallography*.<sup>11</sup> Images of the crystal structures were generated with Mercury (main article) and PLATON (SI).<sup>12,13</sup> CCDC 2010591-2010593 contains the supplementary crystallographic data for this paper. These data are provided free of charge by The Cambridge Crystallographic Data Centre.

## Compound 18 (CCDC 2010593)

Single crystals were obtained by solvent evaporation from a saturated solution of **18** in Et<sub>2</sub>O.

Ellipsoids in the ORTEP structure are displayed at the 50% probability level.

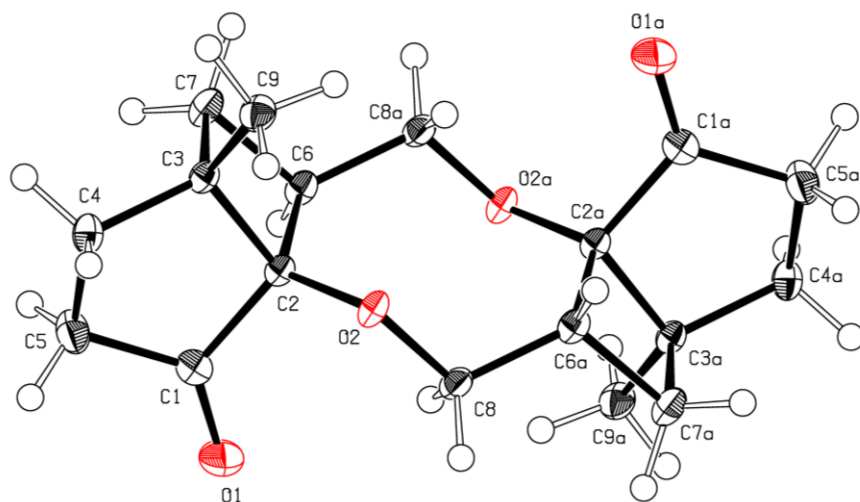

Diffractometer operator C. Jandl  
scanspeed 1-10 s per frame  
dx 37 mm  
3415 frames measured in 13 data sets  
phi-scans with delta\_phi = 0.5  
omega-scans with delta\_omega = 0.5  
shutterless mode

### *Crystal data*

C<sub>18</sub>H<sub>24</sub>O<sub>4</sub>

$M_r = 304.37$

Monoclinic, C<sub>2</sub>/c

Hall symbol: -C 2yc

$a = 18.1075 (17) \text{ \AA}$

$b = 11.052 (1) \text{ \AA}$

$c = 8.2387 (8) \text{ \AA}$

$\beta = 111.686 (3)^\circ$

$D_x = 1.320 \text{ Mg m}^{-3}$

Melting point: > 493 K

Mo K $\alpha$  radiation,  $\lambda = 0.71073 \text{ \AA}$

Cell parameters from 9504 reflections

$\theta = 2.2\text{--}28.3^\circ$

$\mu = 0.09 \text{ mm}^{-1}$

$T = 100 \text{ K}$

$$V = \underline{1532.1 (3)} \text{ \AA}^3$$

Fragment, colourless

$$Z = 4$$

$$\underline{0.26} \times \underline{0.16} \times \underline{0.13} \text{ mm}$$

$$F(000) = \underline{656}$$

### *Data collection*

Bruker D8 Venture  
diffractometer

1827 independent reflections

Radiation source: IMS microsource 1720 reflections with  $I > 2\sigma(I)$

Helios optic monochromator  $R_{\text{int}} = \underline{0.029}$

Detector resolution: 7.5 pixels  $\text{mm}^{-1}$   $\theta_{\text{max}} = \underline{27.9}^\circ$ ,  $\theta_{\text{min}} = \underline{2.2}^\circ$

phi- and  $\omega$ -rotation scans  $h = \underline{-23}$  23

Absorption correction: multi-scan  $k = \underline{-14}$  14  
SADABS 2016/2, Bruker

$T_{\text{min}} = \underline{0.725}$ ,  $T_{\text{max}} = \underline{0.746}$   $l = \underline{-10}$  10

49708 measured reflections

### *Refinement*

Refinement on  $F^2$

Secondary atom site location: difference  
Fourier map

Least-squares matrix: full

Hydrogen site location: inferred from  
neighbouring sites

$$R[F^2 > 2\sigma(F^2)] = \underline{0.034}$$

H-atom parameters constrained

$$wR(F^2) = \underline{0.093}$$

$$\underline{W = 1/[\Sigma^2(FO^2) + (0.0421P)^2 + 1.3923P]}$$
$$\underline{\text{WHERE } P = (FO^2 + 2FC^2)/3}$$

$$S = \underline{1.09}$$

$$(\Delta/\sigma)_{\text{max}} \leq \underline{0.001}$$

1827 reflections

$$\Delta\rho_{\text{max}} = \underline{0.39} \text{ e \AA}^{-3}$$

101 parameters

$$\Delta\rho_{\text{min}} = \underline{-0.21} \text{ e \AA}^{-3}$$

0 restraints

Extinction correction: none

0 constraints

Extinction coefficient: -

Primary atom site location: intrinsic phasing

## Compound 21 (CCDC 2010591)

Single crystals were obtained by diffusion of pentane into a saturated solution of **21** in CH<sub>2</sub>Cl<sub>2</sub>.

Ellipsoids in the ORTEP structure are displayed at the 50% probability level.

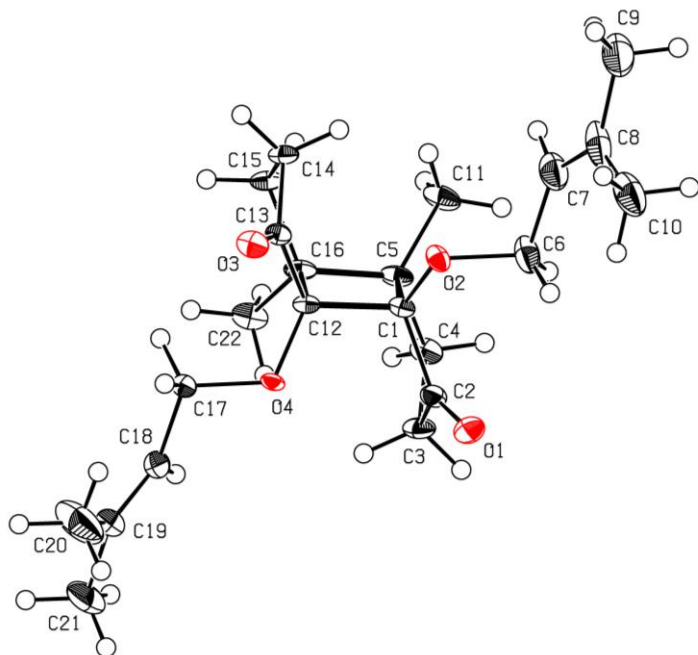

Diffraction operator C. Jandl  
scanspeed 10-60 s per frame  
dx 50 mm  
1488 frames measured in 6 data sets  
phi-scans with delta\_phi = 0.5  
omega-scans with delta\_omega = 0.5  
shutterless mode

### *Crystal data*

C<sub>22</sub>H<sub>32</sub>O<sub>4</sub>

M<sub>r</sub> = 360.47

Monoclinic, P2<sub>1</sub>/n

Hall symbol: -P 2yn

a = 11.8018 (14) Å

b = 6.7440 (8) Å

c = 25.405 (3) Å

β = 100.493 (4)°

V = 1988.2 (4) Å<sup>3</sup>

D<sub>x</sub> = 1.204 Mg m<sup>-3</sup>

Melting point: 358–371 K

Mo Kα radiation, λ = 0.71073 Å

Cell parameters from 8914 reflections

θ = 3.1–25.5°

μ = 0.08 mm<sup>-1</sup>

T = 100 K

Fragment, colourless

$Z = 4$   $0.15 \times 0.12 \times 0.04$  mm

$F(000) = 784$

### Data collection

Bruker D8 Venture  
diffractometer

3647 independent reflections

Radiation source: TXS rotating anode 2817 reflections with  $I > 2\sigma(I)$

Helios optic monochromator  $R_{\text{int}} = 0.066$

Detector resolution: 7.5 pixels  $\text{mm}^{-1}$   $\theta_{\text{max}} = 25.4^\circ$ ,  $\theta_{\text{min}} = 2.7^\circ$

phi- and omega-rotation scans  $h = -14 \ 14$

Absorption correction: multi-scan  $k = -8 \ 7$   
SADABS 2016/2, Bruker

$T_{\text{min}} = 0.647$ ,  $T_{\text{max}} = 0.745$   $l = -28 \ 30$

28402 measured reflections

### Refinement

Refinement on  $F^2$

Secondary atom site location: difference  
Fourier map

Least-squares matrix: full

Hydrogen site location: inferred from  
neighbouring sites

$R[F^2 > 2\sigma(F^2)] = 0.065$

H-atom parameters constrained

$wR(F^2) = 0.188$

$W = 1/[\Sigma^2(FO^2) + (0.0982P)^2 + 1.8965P]$   
WHERE  $P = (FO^2 + 2FC^2)/3$

$S = 1.10$

$(\Delta/\sigma)_{\text{max}} \leq 0.001$

3647 reflections

$\Delta\rho_{\text{max}} = 0.47 \text{ e } \text{\AA}^{-3}$

489 parameters

$\Delta\rho_{\text{min}} = -0.46 \text{ e } \text{\AA}^{-3}$

602 restraints

Extinction correction: none

0 constraints

Extinction coefficient: -

Primary atom site location: intrinsic phasing

## Compound S1 (CCDC 2010592)

Single crystals were obtained by solvent evaporation from a saturated solution of **S1** in CH<sub>2</sub>Cl<sub>2</sub>.

Ellipsoids in the ORTEP structure are displayed at the 50% probability level.

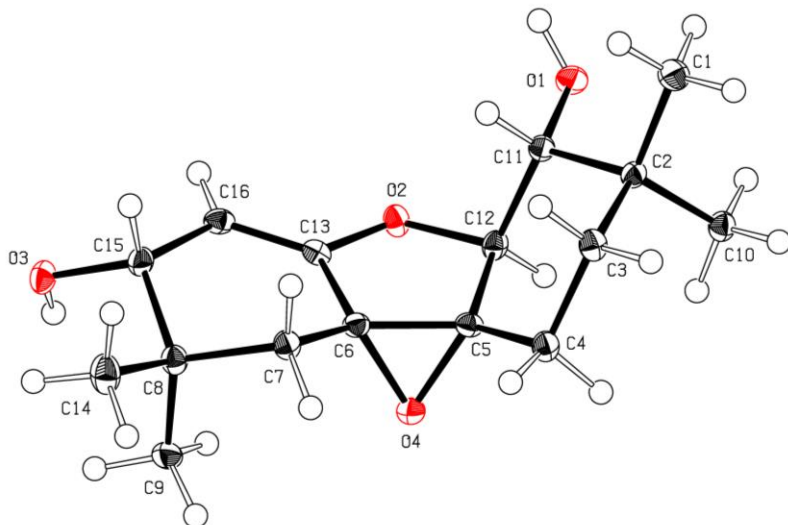

Diffraction operator T. Pickl & A. Poethig  
phi-scans with  $\Delta\phi = 0.5$   
omega-scans with  $\Delta\omega = 0.5$   
shutterless mode

### *Crystal data*

C<sub>16</sub>H<sub>24</sub>O<sub>4</sub>

$M_r = 280.35$

$D_x = 1.291 \text{ Mg m}^{-3}$

Monoclinic,  $P2_1/n$

Hall symbol: -P 2yn

Mo  $K\alpha$  radiation,  $\lambda = 0.71073 \text{ \AA}$

$a = 6.1182 (3) \text{ \AA}$

Cell parameters from 6447 reflections

$b = 10.6025 (5) \text{ \AA}$

$\theta = 2.7\text{--}26.4^\circ$

$c = 22.3764 (12) \text{ \AA}$

$\mu = 0.09 \text{ mm}^{-1}$

$\beta = 96.280 (3)^\circ$

$T = 100 \text{ K}$

$V = 1442.81 (13) \text{ \AA}^3$

Needle, clear colourless

$Z = 4$

$0.74 \times 0.09 \times 0.06 \text{ mm}$

$$F(000) = \underline{608}$$

### Data collection

Bruker D8 Venture  
diffractometer 2960 independent reflections

Radiation source: IMS microsource 2598 reflections with  $I > 2\sigma(I)$

HELIOS optic monochromator  $R_{\text{int}} = \underline{0.065}$

Detector resolution: 7.5 pixels  $\text{mm}^{-1}$   $\theta_{\text{max}} = \underline{26.4}^\circ$ ,  $\theta_{\text{min}} = \underline{2.1}^\circ$

phi- and omega-rotation scans  $h = \underline{-7}$  7

Absorption correction: multi-scan  $k = \underline{-13}$  13  
SADABS 2016/2, Bruker

$T_{\text{min}} = \underline{0.655}$ ,  $T_{\text{max}} = \underline{0.745}$   $l = \underline{-27}$  27

28565 measured reflections

### Refinement

Refinement on  $F^2$  Secondary atom site location: difference  
Fourier map

Least-squares matrix: full Hydrogen site location: mixed

$R[F^2 > 2\sigma(F^2)] = \underline{0.053}$  H atoms treated by a mixture of independent  
and constrained refinement

$wR(F^2) = \underline{0.128}$   $W = 1/[\Sigma^2(FO^2) + (0.0351P)^2 + 1.9676P]$   
WHERE  $P = (FO^2 + 2FC^2)/3$

$S = \underline{1.14}$   $(\Delta/\sigma)_{\text{max}} \leq \underline{0.001}$

2960 reflections  $\Delta\rho_{\text{max}} = \underline{0.30}$  e  $\text{\AA}^{-3}$

193 parameters  $\Delta\rho_{\text{min}} = \underline{-0.24}$  e  $\text{\AA}^{-3}$

0 restraints Extinction correction: none

0 constraints Extinction coefficient: -

Primary atom site location: intrinsic phasing



## 9. References

- <sup>1</sup> Clark, W. D. K.; Litt, A. D.; Steel, C. Triplet lifetimes of benzophenone, acetophenone, and triphenylene in hydrocarbons. *J. Am. Chem. Soc.* **1969**, *91*, 5413-5415.
- <sup>2</sup> Iyer, A.; Clay, A.; Jockusch, S.; Sivaguru, J. Evaluating brominated thioxanthenes as organophotocatalysts. *J. Phys. Org. Chem.* **2017**, *30*, e3738.
- <sup>3</sup> (a) Baranoff, E.; Curchod, B. F. E.; Monti, F.; Steimer, F.; Accorsi, G.; Tavernelli, I.; Rothlisberger, U.; Scopelliti, R.; Grätzel, M.; Nazeeruddin, M. K. Influence of Halogen Atoms on a Homologous Series of Bis-Cyclometalated Iridium(III) Complexes. *Inorg. Chem.* **2012**, *51*, 799-811. (b) Yi, S.; Kim, J.-H.; Cho, Y.-J.; Lee, J.; Choi, T.-S.; Cho, D. W.; Pac, C.; Han, W.-S.; Son, H.-J.; Kang, S. O. Stable Blue Phosphorescence Iridium(III) Cyclometalated Complexes Prompted by Intramolecular Hydrogen Bond in Ancillary Ligand. *Inorg. Chem.* **2016**, *55*, 3324-3331.
- <sup>4</sup> Singh, A.; Teegardin, K.; Kelly, M.; Prasad, K. S.; Krishnan, S.; Weaver, J. D. Facile synthesis and complete characterization of homoleptic and heteroleptic cyclometalated Iridium(III) complexes for photocatalysis. *J. Organomet. Chem.* **2015**, *776*, 51-59.
- <sup>5</sup> (a) Juris, A.; Balzani, V.; Belser, P.; von Zelewsky, A. Characterization of the Excited State Properties of Some New Photosensitizers of the Ruthenium (Polypyridine) Family. *Helv. Chim. Acta* **1981**, *64*, 2175-2182. (b) Kalyanasundaram, K. Photophysics, photochemistry and solar energy conversion with tris(bipyridyl)ruthenium(II) and its analogues. *Coord. Chem. Rev.* **1982**, *46*, 159-244.
- <sup>6</sup> *APEX suite of crystallographic software*, APEX 3, Version 2016-9.0, Bruker AXS Inc., Madison, Wisconsin, USA, 2016.
- <sup>7</sup> *SAINT*, Versions 8.37A and 8.38A and *SADABS*, Version 2016/2, Bruker AXS Inc., Madison, Wisconsin, USA, 2016/2017.
- <sup>8</sup> Sheldrick, G.M. SHELXT – Integrated space-group and crystal-structure determination. *Acta Crystallogr. Sect. A* **2015**, *71*, 3–8.
- <sup>9</sup> Sheldrick, G.M. Crystal structure refinement with SHELXL. *Acta Crystallogr. Sect. C* **2015**, *71*, 3–8.

<sup>10</sup> Hübschle, C.B.; Sheldrick, G. M.; Dittrich, B. ShelXle: a Qt graphical user interface for SHELXL *J. Appl. Cryst.* **2011**, *44*, 1281–1284.

<sup>11</sup> *International Tables for Crystallography, Vol. C* (Ed.: A. J. Wilson), Kluwer Academic Publishers, Dordrecht, The Netherlands, **1992**, Tables 6.1.1.4 (pp. 500–502), 4.2.6.8 (pp. 219–222), and 4.2.4.2 (pp. 193–199).

<sup>12</sup> Macrae, C. F.; Bruno, I. J.; Chisholm, J. A.; Edgington, P. R.; McCabe, P.; Pidcock, E.; Rodriguez-Monge, L.; Taylor, R.; van de Streek, J.; Wood, P. A. Mercury CSD 2.0 - new features for the visualization and investigation of crystal structures. *J. Appl. Cryst.* **2008**, *41*, 466–470.

<sup>13</sup> Spek, A. L. Structure validation in chemical crystallography. *Acta Crystallogr. Sect. D* **2009**, *65*, 148–155.
